# Supplementary material
Source: PubMed Central journal article supplement (PMC6906942)
Supplement: ao9b03144_si_001.pdf [file ao9b03144_si_001.pdf]

## Supporting Information

### Herbicidal Activity of Flavokawains and Related *trans*-Chalcones Against *Amaranthus tricolor* L. and *Echinochloa crus-galli* (L.) Beauv.

Nawasit Chotsaeng,<sup>\*,†,‡</sup> Chamroon Laosinwattana,<sup>§</sup> Patchanee Charoenying,<sup>†</sup>

<sup>†</sup>Department of Chemistry, Faculty of Science, King Mongkut's Institute of Technology Ladkrabang, Bangkok 10520, Thailand

<sup>‡</sup>Integrated Applied Chemistry Research Unit, Faculty of Science, King Mongkut's Institute of Technology Ladkrabang, Bangkok 10520, Thailand

<sup>§</sup>Department of Plant Production Technology, Faculty of Agricultural Technology, King Mongkut's Institute of Technology Ladkrabang, Bangkok 10520, Thailand

\*Corresponding Author

E-mail: [nawasit.ch@kmitl.ac.th](mailto:nawasit.ch@kmitl.ac.th) or [chotsaeng\\_n@yahoo.com](mailto:chotsaeng_n@yahoo.com)

Tel.: +66-2329-8400 (ext. 6228); Fax: +662-3298428

### **Table of Contents**

|                                                                              |     |
|------------------------------------------------------------------------------|-----|
| 1. Spectroscopic data for compounds in Table 1.....                          | S2  |
| 2. Spectroscopic data for compounds in Table 2.....                          | S13 |
| 3. <sup>1</sup> H NMR and <sup>13</sup> C NMR spectra for new compounds..... | S26 |
| References.....                                                              | S59 |

## 1. Spectroscopic data for compounds in Table 1

### (*E*)-1-(2-Hydroxy-4,6-dimethoxyphenyl)-3-phenylprop-2-en-1-one (Flavokawain B)

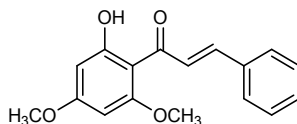

The title compound was prepared according to General Procedure A from xanthoxyline and benzaldehyde for a reaction time of 12 h and purified by recrystallization (MeOH) to afford a yellow solid (154 mg, 54%).

m.p. 84-85 °C (MeOH);

$R_f$  = 0.21 (10% EtOAc/hexane);

IR (film) 3057, 2972, 1616 (C=O), 1578, 1562, 1449, 1416, 1213 (C-O), 1157, 744  $\text{cm}^{-1}$ ;

$^1\text{H}$  NMR (500 MHz,  $\text{CDCl}_3$ )  $\delta$  14.30 (1H, s, OH), 7.92 (1H, d,  $J$  = 15.6 Hz, CH=CH), 7.79 (1H, d,  $J$  = 15.6 Hz, CH=CH), 7.66-7.57 (2H, m, ArH), 7.47-7.35 (3H, m, ArH), 6.12 (1H, d,  $J$  = 2.4 Hz, ArH), 5.98 (1H, d,  $J$  = 2.4 Hz, ArH), 3.93 (3H, s, OCH<sub>3</sub>), 3.85 (3H, s, OCH<sub>3</sub>);

$^{13}\text{C}$  NMR (125.8 MHz,  $\text{CDCl}_3$ )  $\delta$  192.63 (C=O), 168.39 (C), 166.23 (C), 162.50 (C), 142.31 (CH), 135.55 (C), 130.04 (CH), 128.86 (2  $\times$  CH), 128.34 (2  $\times$  CH), 127.52 (CH), 106.33 (C), 93.78 (CH), 91.26 (CH), 55.84 (CH<sub>3</sub>), 55.57 (CH<sub>3</sub>).

The NMR data were in agreement with the literature.<sup>1-6</sup>

### (*E*)-1-(2-Hydroxy-4,6-dimethoxyphenyl)-3-*o*-tolylprop-2-en-1-one (1)

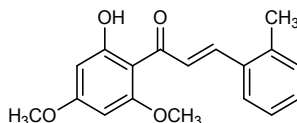

The title compound was prepared according to General Procedure A from xanthoxyline and 2-methylbenzaldehyde for a reaction time of 12 h and purified by recrystallization (MeOH) to afford a yellow solid (197.5 mg, 66.2%).

m.p. 117-118 °C (MeOH);

$R_f$  = 0.48 (20% EtOAc/hexane);

IR (film) 2941, 1622 (C=O), 1580, 1562, 1417, 1339, 1265, 1217 (C-O), 1157, 737  $\text{cm}^{-1}$ ;

$^1\text{H}$  NMR (500 MHz,  $\text{CDCl}_3$ )  $\delta$  14.32 (1H, s, OH), 8.08 (1H, d,  $J$  = 15.5 Hz, CH=CH), 7.82 (1H, d,  $J$  = 15.5 Hz, CH=CH), 7.65 (1H, dd,  $J$  = 7.8, 1.2 Hz, ArH), 7.31-7.27 (1H, m, ArH), 7.27-7.22 (2H, m, ArH), 6.12 (1H, d,  $J$  = 2.4 Hz, ArH), 5.97 (1H, d,  $J$  = 2.4 Hz, ArH), 3.91 (3H, s, OCH<sub>3</sub>), 3.84 (3H, s, OCH<sub>3</sub>), 2.50 (3H, s, CH<sub>3</sub>);

$^{13}\text{C}$  NMR (125.8 MHz,  $\text{CDCl}_3$ )  $\delta$  192.68 (C=O), 168.36 (C), 166.20 (C), 162.49 (C), 139.91 (CH), 138.11 (C), 134.48 (C), 130.82 (CH), 129.74 (CH), 128.58 (CH), 126.58 (CH), 126.22 (CH), 106.32 (C), 93.78 (CH), 91.20 (CH), 55.79 (CH<sub>3</sub>), 55.52 (CH<sub>3</sub>), 19.89 (CH<sub>3</sub>).

The NMR data were in agreement with the literature.<sup>6</sup>

**(E)-1-(2-Hydroxy-4,6-dimethoxyphenyl)-3-(4-isopropylphenyl)prop-2-en-1-one (2)**

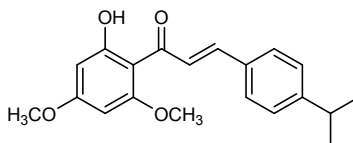

The title compound was prepared according to General Procedure A from xanthoxyline and 4-isopropylbenzaldehyde for a reaction time of 12 h and purified by recrystallization (MeOH) to afford a yellow solid (244.8 mg, 75%).

m.p. 116-117 °C (MeOH);

$R_f$  = 0.48 (20% EtOAc/hexane);

IR (film) 2963, 1620 (C=O), 1558, 1454, 1416, 1339, 1213(C-O), 1157, 1113, 735  $\text{cm}^{-1}$ ;

$^1\text{H}$  NMR (500 MHz,  $\text{CDCl}_3$ )  $\delta$  14.35 (1H, s, OH), 7.87 (1H, d,  $J$  = 15.6 Hz, CH=CH), 7.78 (1H, d,  $J$  = 15.6 Hz, CH=CH), 7.54 (2H, d,  $J$  = 8.2 Hz, ArH), 7.27 (2H, d,  $J$  = 8.4 Hz, ArH), 6.10 (1H, d,  $J$  = 2.4 Hz, ArH), 5.96 (1H, d,  $J$  = 2.4 Hz, ArH), 3.91 (3H, s, OCH<sub>3</sub>), 3.83 (3H, s, OCH<sub>3</sub>), 2.99-2.89 (1H, m, CH), 1.27 (6H, d,  $J$  = 6.9 Hz, CH<sub>3</sub>);

$^{13}\text{C}$  NMR (125.8 MHz,  $\text{CDCl}_3$ )  $\delta$  192.67 (C=O), 168.35 (C), 166.10 (C), 162.48 (C), 151.38 (C), 142.47 (CH), 133.20 (C), 128.47 (2  $\times$  CH), 126.97 (2  $\times$  CH), 126.58 (CH), 106.34 (C), 93.78 (CH), 91.20 (CH), 55.77 (CH<sub>3</sub>), 55.51 (CH<sub>3</sub>), 34.07 (CH), 23.75 (2  $\times$  CH<sub>3</sub>) (Figure S1).

HRMS (ESI) Exact mass calcd for  $\text{C}_{20}\text{H}_{21}\text{O}_4$  [M-H]<sup>+</sup>: 325.1445, found 325.1460.

**(E)-1-(2-Hydroxy-4,6-dimethoxyphenyl)-3-(3-methoxyphenyl)prop-2-en-1-one (3)**

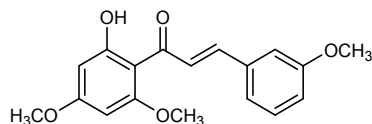

The title compound was prepared according to General Procedure A from xanthoxyline and 3-methoxybenzaldehyde for a reaction time of 24 h and purified by recrystallization (MeOH) to afford a yellow solid (209.7 mg, 66.7%).

m.p. 95-96 °C (MeOH);

$R_f$  = 0.35 (20% EtOAc/hexane);

IR (film) 2941, 1616 (C=O), 1578, 1562, 1454, 1416, 1339, 1211 (C-O), 1157, 735  $\text{cm}^{-1}$ ;

$^1\text{H}$  NMR (500 MHz,  $\text{CDCl}_3$ )  $\delta$  14.28 (1H, s, OH), 7.88 (1H, d,  $J$  = 15.6 Hz, CH=CH), 7.74 (1H, d,  $J$  = 15.6 Hz, CH=CH), 7.33 (1H, t,  $J$  = 7.9 Hz, ArH), 7.21 (1H, d,  $J$  = 7.7 Hz, ArH), 7.14-7.10 (1H, m, ArH), 6.96-6.92 (1H, m, ArH), 6.11 (1H, d,  $J$  = 2.4 Hz, ArH), 5.96 (1H, d,  $J$  = 2.4 Hz, ArH), 3.92 (3H, s, OCH<sub>3</sub>), 3.86 (3H, s, OCH<sub>3</sub>), 3.84 (3H, s, OCH<sub>3</sub>);

$^{13}\text{C}$  NMR (125.8 MHz,  $\text{CDCl}_3$ )  $\delta$  192.56 (C=O), 168.37 (C), 166.24 (C), 162.48 (C), 159.85 (C), 142.11 (CH), 136.96 (C), 129.80 (CH), 127.87 (CH), 120.87 (CH), 115.56 (CH), 113.62 (CH), 106.31 (C), 93.79 (CH), 91.24 (CH), 55.81 ( $\text{CH}_3$ ), 55.54 ( $\text{CH}_3$ ), 55.24 ( $\text{CH}_3$ ) (Figure S2).  
HRMS (ESI) Exact mass calcd for  $\text{C}_{18}\text{H}_{17}\text{O}_5$   $[\text{M}-\text{H}]^+$ : 313.1081, found 313.1084.

**(E)-1-(2-Hydroxy-4,6-dimethoxyphenyl)-3-(4-methoxyphenyl)prop-2-en-1-one  
(Flavokawain A)**

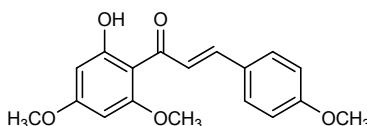

The title compound was prepared according to General Procedure A from xanthoxyline and 4-methoxybenzaldehyde for a reaction time of 24 h and purified by recrystallization (MeOH) to afford a yellow solid (234.5 mg, 74.6%).

m.p. 104-105 °C (MeOH);

$R_f$  = 0.35 (20% EtOAc/hexane);

IR (film) 3051, 2970, 1616 (C=O), 1582, 1510, 1436, 1421, 1215 (C-O), 1157, 827  $\text{cm}^{-1}$ ;

$^1\text{H}$  NMR (500 MHz,  $\text{CDCl}_3$ )  $\delta$  14.44 (1H, s, OH), 7.83-7.75 (2H, m, CH=CH), 7.58-7.54 (2H, m, ArH), 6.94-6.90 (2H, m, ArH), 6.10 (1H, d,  $J$  = 2.4 Hz, ArH), 5.95 (1H, d,  $J$  = 2.4 Hz, ArH), 3.91 (3H, s,  $\text{OCH}_3$ ), 3.85 (3H, s,  $\text{OCH}_3$ ), 3.82 (3H, s,  $\text{OCH}_3$ );

$^{13}\text{C}$  NMR (125.8 MHz,  $\text{CDCl}_3$ )  $\delta$  192.51 (C=O), 168.31 (C), 165.96 (C), 162.40 (C), 161.30 (C), 142.37 (CH), 130.03 (2  $\times$  CH), 128.24 (C), 125.05 (CH), 114.29 (2  $\times$  CH), 106.27 (C), 93.77 (CH), 91.13 (CH), 55.74 ( $\text{CH}_3$ ), 55.47 ( $\text{CH}_3$ ), 55.31 ( $\text{CH}_3$ ).

The NMR data were in agreement with the literature.<sup>1-8</sup>

**(E)-1-(2-Hydroxy-4,6-dimethoxyphenyl)-3-(4-isopropoxyphenyl)prop-2-en-1-one (4)**

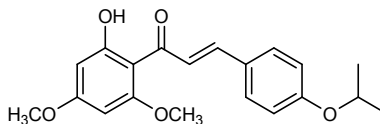

The title compound was prepared according to General Procedure A from xanthoxyline and 4-isopropoxybenzaldehyde for a reaction time of 24 h and purified by recrystallization (MeOH) to afford a yellow solid (193.8 mg, 56.6%).

m.p. 111-112 °C (MeOH);

$R_f$  = 0.45 (20% EtOAc/hexane);

IR (film) 2978, 1620 (C=O), 1603, 1557, 1506, 1342, 1213 (C-O), 1157, 1114, 735  $\text{cm}^{-1}$ ;

$^1\text{H}$  NMR (500 MHz,  $\text{CDCl}_3$ )  $\delta$  14.44 (1H, s, OH), 7.83-7.75 (2H, m, CH=CH), 7.57-7.52 (2H, m, ArH), 6.92-6.87 (2H, m, ArH), 6.11 (1H, d,  $J$  = 2.4 Hz, ArH), 5.96 (1H, d,  $J$  = 2.4 Hz, ArH),

4.61 (1H, hept,  $J = 6.0$  Hz, OCH), 3.92 (3H, s, OCH<sub>3</sub>), 3.83 (3H, s, OCH<sub>3</sub>), 1.37 (6H, d,  $J = 6.0$  Hz, CH<sub>3</sub>);

<sup>13</sup>C NMR (125.8 MHz, CDCl<sub>3</sub>)  $\delta$  192.56 (C=O), 168.32 (C), 165.95 (C), 162.43 (C), 159.80 (C), 142.55 (CH), 130.11 (2  $\times$  CH), 127.91 (C), 124.87 (CH), 115.89 (2  $\times$  CH), 106.33 (C), 93.79 (CH), 91.16 (CH), 69.98 (CH), 55.78 (CH<sub>3</sub>), 55.50 (CH<sub>3</sub>), 21.95 (2  $\times$  CH<sub>3</sub>).

The NMR data were in agreement with the literature.<sup>9</sup>

**(E)-1-(2-Hydroxy-4,6-dimethoxyphenyl)-3-(4-isopropoxy-3-methoxyphenyl)prop-2-en-1-one (5)**

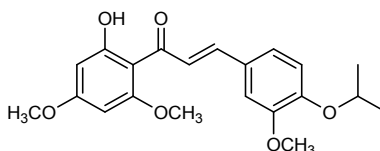

The title compound was prepared according to General Procedure A from xanthoxyline and 4-isopropoxy-3-methoxybenzaldehyde for a reaction time of 48 h and purified by recrystallization (MeOH) to afford a yellow solid (205.1 mg, 55.1%).

m.p. 119-120 °C (MeOH);

R<sub>f</sub> = 0.42 (20% EtOAc/hexane);

IR (film) 2978, 1620 (C=O), 1580, 1557, 1506, 1464, 1256, 1209 (C-O), 1111, 733 cm<sup>-1</sup>;

<sup>1</sup>H NMR (500 MHz, CDCl<sub>3</sub>)  $\delta$  14.43 (1H, s, OH), 7.80 (1H, d,  $J = 15.5$  Hz, CH=CH), 7.75 (1H, d,  $J = 15.5$  Hz, CH=CH), 7.19 (1H, dd,  $J = 8.3, 2.0$  Hz, ArH), 7.13 (1H, d,  $J = 1.9$  Hz, ArH), 6.90 (1H, d,  $J = 8.4$  Hz, ArH), 6.11 (1H, d,  $J = 2.4$  Hz, ArH), 5.96 (1H, d,  $J = 2.4$  Hz, ArH), 4.61 (1H, hept,  $J = 6.1$  Hz, OCH), 3.91 (6H, s, OCH<sub>3</sub>), 3.83 (3H, s, OCH<sub>3</sub>), 1.41 (6H, d,  $J = 6.1$  Hz, CH<sub>3</sub>);

<sup>13</sup>C NMR (125.8 MHz, CDCl<sub>3</sub>)  $\delta$  192.42 (C=O), 168.34 (C), 165.98 (C), 162.38 (C), 150.19 (C), 149.57 (C), 142.68 (CH), 128.53 (C), 125.27 (CH), 122.42 (CH), 114.69 (CH), 111.39 (CH), 106.30 (C), 93.81 (CH), 91.20 (CH), 71.29 (CH), 55.94 (CH<sub>3</sub>), 55.74 (CH<sub>3</sub>), 55.50 (CH<sub>3</sub>), 21.98 (2  $\times$  CH<sub>3</sub>) (Figure S3).

HRMS (ESI) Exact mass calcd for C<sub>21</sub>H<sub>23</sub>O<sub>6</sub> [M-H]<sup>+</sup>: 371.1500, found 371.1502.

**(E)-1-(2-Hydroxy-4,6-dimethoxyphenyl)-3-(2,4,6-trimethoxyphenyl)prop-2-en-1-one (6)**

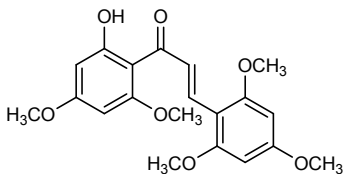

The title compound was prepared according to General Procedure A from xanthoxyline and 2,4,6-trimethoxybenzaldehyde for a reaction time of 96 h and purified by recrystallization (MeOH) to afford an orange solid (102.3 mg, 27.3%).

m.p. 151-152 °C (MeOH);

$R_f$  = 0.37 (50% EtOAc/hexane);

IR (film) 2938, 1611, 1582 (C=O), 1539, 1448, 1319, 1120 (C-O), 1155 (C-O), 1118 (C-O), 817  $\text{cm}^{-1}$ ;

$^1\text{H}$  NMR (500 MHz,  $\text{CDCl}_3$ )  $\delta$  14.76 (1H, s, OH), 8.32 (1H, d,  $J$  = 15.8 Hz, CH=CH), 8.25 (1H, d,  $J$  = 15.8 Hz, CH=CH), 6.13 (2H, s, ArH), 6.10 (1H, d,  $J$  = 2.4 Hz, ArH), 5.94 (1H, d,  $J$  = 2.4 Hz, ArH), 3.90 (6H, s,  $\text{OCH}_3$ ), 3.90 (3H, s,  $\text{OCH}_3$ ), 3.85 (3H, s,  $\text{OCH}_3$ ), 3.82 (3H, s,  $\text{OCH}_3$ );

$^{13}\text{C}$  NMR (125.8 MHz,  $\text{CDCl}_3$ )  $\delta$  194.04 (C=O), 168.23 (C), 165.46 (C), 162.92 (C), 162.44 (C), 161.60 (2  $\times$  C), 134.28 (CH), 126.75 (CH), 107.04 (C), 106.67 (C), 93.74 (CH), 90.97 (CH), 90.53 (2  $\times$  CH), 55.68 (2  $\times$   $\text{CH}_3$ ), 55.50 ( $\text{CH}_3$ ), 55.42 ( $\text{CH}_3$ ), 55.33 ( $\text{CH}_3$ ).

The NMR data were in agreement with the literature.<sup>10</sup>

**(E)-1-(2-Hydroxy-4,6-dimethoxyphenyl)-3-(4-hydroxyphenyl)prop-2-en-1-one  
(Flavokawain C)**

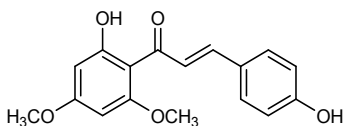

The title compound was prepared according to General Procedure B from xanthoxyline and 4-hydroxybenzaldehyde and purified by recrystallization (MeOH) to afford an orange solid (134 mg, 30%).

m.p. 186-187 °C (MeOH);

$R_f$  = 0.41 (20% EtOAc/hexane);

IR (film) 3600-3100 (br), 2941, 1620 (C=O), 1604, 1582, 1512, 1344, 1213, 1159, 829  $\text{cm}^{-1}$ ;

$^1\text{H}$  NMR (500 MHz,  $\text{CDCl}_3$ )  $\delta$  14.40 (1H, s, OH), 7.81 (1H, d,  $J$  = 15.5 Hz, CH=CH), 7.77 (1H, d,  $J$  = 15.5 Hz, CH=CH), 7.55-7.51 (2H, m, ArH), 6.90-6.84 (2H, m, ArH), 6.12 (1H, d,  $J$  = 2.3 Hz, ArH), 5.98 (1H, d,  $J$  = 2.3 Hz, ArH), 5.28 (1H, s, OH), 3.93 (3H, s,  $\text{OCH}_3$ ), 3.85 (3H, s,  $\text{OCH}_3$ );

$^{13}\text{C}$  NMR (125.8 MHz,  $\text{CDCl}_3$ )  $\delta$  192.62 (C=O), 168.35 (C), 166.06 (C), 162.47 (C), 157.49 (C), 142.33 (CH), 130.31 (2  $\times$  CH), 128.54 (C), 125.23 (CH), 115.88 (2  $\times$  CH), 106.37 (C), 93.83 (CH) 91.27 (CH), 55.58 ( $\text{CH}_3$ ), 55.57 ( $\text{CH}_3$ ).

The NMR data were in agreement with the literature.<sup>4-5, 8</sup>

**(E)-3-(4-Hydroxy-3-methoxyphenyl)-1-(2-hydroxy-4,6-dimethoxyphenyl)prop-2-en-1-one (7)**

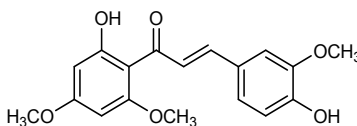

The title compound was prepared according to General Procedure B from xanthoxyline and 4-hydroxy-3-methoxybenzaldehyde and purified by recrystallization (MeOH) to afford a yellow solid (167.4 mg, 35%).

m.p. 113-114 °C (MeOH);

$R_f$  = 0.48 (20% EtOAc/hexane);

IR (film) 2976, 1616 (C=O), 1577, 1557, 1504, 1253, 1207 (C-O), 1107, 1030, 732  $\text{cm}^{-1}$ ;

$^1\text{H}$  NMR (500 MHz,  $\text{CDCl}_3$ )  $\delta$  14.41 (1H, s, OH), 7.79 (1H, d,  $J$  = 15.5 Hz, CH=CH), 7.75 (1H, d,  $J$  = 15.5 Hz, CH=CH), 7.21 (1H, dd,  $J$  = 8.2, 1.9 Hz, ArH), 7.09 (1H, d,  $J$  = 1.9 Hz, ArH), 6.96 (1H, d,  $J$  = 8.2 Hz, ArH), 6.12 (1H, d,  $J$  = 2.4 Hz, ArH), 5.97 (1H, d,  $J$  = 2.4 Hz, ArH), 5.90 (1H, s, OH), 3.96 (3H, s, OCH<sub>3</sub>), 3.92 (3H, s, OCH<sub>3</sub>), 3.84 (3H, s, OCH<sub>3</sub>);

$^{13}\text{C}$  NMR (125.8 MHz,  $\text{CDCl}_3$ )  $\delta$  192.47 (C=O), 168.35 (C), 166.02 (C), 162.41 (C), 147.86 (C), 146.68 (C), 142.82 (CH), 128.22 (C), 125.17 (CH), 122.63 (CH), 114.86 (CH), 110.54 (CH), 106.34 (C), 93.84 (CH), 91.27 (CH), 55.90 (CH<sub>3</sub>), 55.81 (CH<sub>3</sub>), 55.56 (CH<sub>3</sub>) (Figure S4).

HRMS (ESI) Exact mass calcd for  $\text{C}_{18}\text{H}_{17}\text{O}_6$  [M-H]<sup>+</sup>: 329.1031, found 329.1021.

**(E)-3-(2-Fluorophenyl)-1-(2-hydroxy-4,6-dimethoxyphenyl)prop-2-en-1-one (8)**

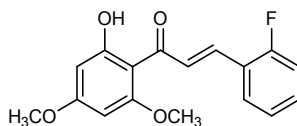

The title compound was prepared according to General Procedure A from xanthoxyline and 2-fluorobenzaldehyde for a reaction time of 12 h and purified by recrystallization (MeOH) to afford a yellow solid (228.3 mg, 75.5%).

m.p. 88-89 °C (MeOH);

$R_f$  = 0.40 (20% EtOAc/hexane);

IR (film) 3009, 2941, 1618 (C=O), 1562, 1487, 1456, 1340, 1213 (C-O), 1157, 734  $\text{cm}^{-1}$ ;

$^1\text{H}$  NMR (500 MHz,  $\text{CDCl}_3$ )  $\delta$  14.25 (1H, s, OH), 8.01 (1H, d,  $J$  = 15.8 Hz, CH=CH), 7.85 (1H, d,  $J$  = 15.8 Hz, CH=CH), 7.60 (1H, td,  $J$  = 7.6, 1.6 Hz, ArH), 7.37-7.31 (1H, m, ArH), 7.18 (1H, td,  $J$  = 7.6, 0.9 Hz, ArH), 7.12 (1H, dd,  $J$  = 10.8, 8.3, 0.9 Hz, ArH), 6.11 (1H, d,  $J$  = 2.4 Hz, ArH), 5.95 (1H, d,  $J$  = 2.4 Hz, ArH), 3.90 (3H, s, OCH<sub>3</sub>), 3.84 (3H, s, OCH<sub>3</sub>);

$^{13}\text{C}$  NMR (125.8 MHz,  $\text{CDCl}_3$ )  $\delta$  192.57 (C=O), 168.41 (C), 166.35 (C), 162.54 (C), 161.64 (d,  $J$  = 254 Hz, C), 134.80 (CH), 131.23 (d,  $J$  = 8.7 Hz, CH), 130.18 (d,  $J$  = 7.5 Hz, CH), 129.66 (d,  $J$

= 2.2 Hz, CH), 124.37 (d,  $J = 3.0$  Hz, CH), 123.65 (d,  $J = 11.5$  Hz, C), 116.18 (d,  $J = 22.1$  Hz, CH), 106.33 (C), 93.78 (CH), 91.23 (CH), 55.73 (CH<sub>3</sub>), 55.55 (CH<sub>3</sub>) (Figure S5).  
HRMS (ESI) Exact mass calcd for C<sub>17</sub>H<sub>14</sub>FO<sub>4</sub> [M-H]<sup>+</sup>: 329.0882, found 329.0897.

**(E)-3-(2,4-Dichlorophenyl)-1-(2-hydroxy-4,6-dimethoxyphenyl)prop-2-en-1-one (9)**

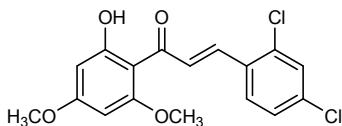

The title compound was prepared according to General Procedure A from xanthoxyline and 2,4-dichlorobenzaldehyde for a reaction time of 12 h and purified by recrystallization (MeOH) to afford an orange solid (251.1 mg, 71.1%).

m.p. 165-166 °C (MeOH);

R<sub>f</sub> = 0.40 (20% EtOAc/hexane);

IR (film) 2926, 2854, 1630 (C=O), 1584, 1560, 1468, 1439, 1344, 1213 (C-O), 1111, 814 cm<sup>-1</sup>;

<sup>1</sup>H NMR (500 MHz, CDCl<sub>3</sub>) δ 14.16 (1H, s, OH), 8.05 (1H, d,  $J = 15.6$  Hz, CH=CH), 7.84 (1H, d,  $J = 15.6$  Hz, CH=CH), 7.61 (1H, d,  $J = 8.5$  Hz, ArH), 7.45 (1H, d,  $J = 2.1$  Hz, ArH), 7.29-7.25 (1H, m, ArH), 6.10 (1H, d,  $J = 2.4$  Hz, ArH), 5.95 (1H, d,  $J = 2.4$  Hz, ArH), 3.90 (3H, s, OCH<sub>3</sub>), 3.84 (3H, s, OCH<sub>3</sub>);

<sup>13</sup>C NMR (125.8 MHz, CDCl<sub>3</sub>) δ 191.96 (C=O), 168.48 (C), 166.50 (C), 162.42 (C), 136.49 (CH), 135.84 (C), 135.82 (C), 132.44 (C), 130.38 (CH), 130.00 (CH), 128.47 (CH), 127.44 (CH), 106.23 (C), 93.83 (CH), 91.31 (CH), 55.86 (CH<sub>3</sub>), 55.59 (CH<sub>3</sub>) (Figure S6).

HRMS (ESI) Exact mass calcd for C<sub>17</sub>H<sub>14</sub>Cl<sub>2</sub>NaO<sub>4</sub> [M+Na]<sup>+</sup>: 375.0161, found 375.0171.

**(E)-3-(3-Bromophenyl)-1-(2-hydroxy-4,6-dimethoxyphenyl)prop-2-en-1-one (10)**

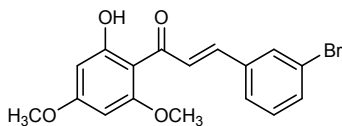

The title compound was prepared according to General Procedure A from xanthoxyline and 3-bromobenzaldehyde for a reaction time of 12 h and purified by recrystallization (MeOH) to afford a yellow solid (302.8 mg, 83.4%).

m.p. 112-113 °C (MeOH);

R<sub>f</sub> = 0.41 (20% EtOAc/hexane);

IR (film) 2941, 1618 (C=O), 1578, 1416, 1339, 1263, 1215 (C-O), 1157, 1113, 737 cm<sup>-1</sup>;

<sup>1</sup>H NMR (500 MHz, CDCl<sub>3</sub>) δ 14.19 (1H, s, OH), 7.85 (1H, d,  $J = 15.6$  Hz, CH=CH), 7.72 (1H, t,  $J = 1.7$  Hz, ArH), 7.66 (1H, d,  $J = 15.6$  Hz, CH=CH), 7.51 (1H, d,  $J = 1.8$  Hz, ArH), 7.49 (1H, d,  $J = 1.8$  Hz, ArH), 7.27 (1H, dd,  $J = 8.7, 7.0$  Hz, ArH), 6.11 (1H, d,  $J = 2.4$  Hz, ArH), 5.96 (1H, d,  $J = 2.4$  Hz, ArH), 3.92 (3H, s, OCH<sub>3</sub>), 3.84 (3H, s, OCH<sub>3</sub>);



$^{13}\text{C}$  NMR (125.8 MHz,  $\text{CDCl}_3$ )  $\delta$  192.17 (C=O), 168.42 (C), 166.42 (C), 162.47 (C), 140.25 (CH), 137.75 (C), 132.67 (CH), 130.83 (CH), 130.32 (CH), 128.89 (CH), 126.93 (CH), 122.95 (C), 106.26 (C), 93.81 (CH), 91.30 (CH), 55.90 ( $\text{CH}_3$ ), 55.58 ( $\text{CH}_3$ ).

The NMR data were in agreement with the literature.<sup>6, 11</sup>

**(E)-1-(2-Hydroxy-4,6-dimethoxyphenyl)-3-(2-(trifluoromethyl)phenyl)prop-2-en-1-one (11)**

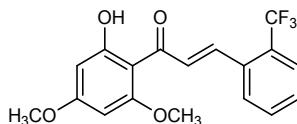

The title compound was prepared according to General Procedure A from xanthoxyline and 3-bromobenzaldehyde for a reaction time of 12 h and purified by recrystallization (MeOH) to afford a yellow solid (294.2 mg, 83.5%).

m.p. 143-144 °C (MeOH);

$R_f$  = 0.30 (20% EtOAc/hexane);

IR (film) 2949, 1633 (C=O), 1622, 1576, 1439, 1344, 1312, 1215 (C-O), 1112, 816  $\text{cm}^{-1}$ ;

$^1\text{H}$  NMR (500 MHz,  $\text{CDCl}_3$ )  $\delta$  14.15 (1H, s, OH), 8.10 (1H, dd,  $J$  = 15.4, 2.1 Hz, CH=CH), 7.82 (1H, t,  $J$  = 15.4 Hz, CH=CH), 7.78 (1H, d,  $J$  = 7.8 Hz, ArH), 7.71 (1H, d,  $J$  = 7.8 Hz, ArH), 7.59 (1H, t,  $J$  = 7.6 Hz, ArH), 7.47 (1H, t,  $J$  = 7.6 Hz, ArH), 6.10 (1H, d,  $J$  = 2.3 Hz, ArH), 5.95 (1H, d,  $J$  = 2.3 Hz, ArH), 3.90 (3H, s, OCH<sub>3</sub>), 3.84 (3H, s, OCH<sub>3</sub>);

$^{13}\text{C}$  NMR (125.8 MHz,  $\text{CDCl}_3$ )  $\delta$  192.01 (C=O), 168.47 (C), 166.51 (C), 162.49 (C), 137.12 (CH), 134.63 (C), 131.96 (CH), 131.51 (CH), 129.17 (CH), 129.05 (m, C), 127.90 (CH), 126.14 (d,  $J$  = 5.5 Hz, CH), 124.03 (q,  $J$  = 273.9 Hz, C), 106.21 (C), 93.83 (CH), 91.27 (CH), 55.83 ( $\text{CH}_3$ ), 55.56 ( $\text{CH}_3$ ) (Figure S7).

HRMS (ESI) Exact mass calcd for  $\text{C}_{18}\text{H}_{14}\text{F}_3\text{O}_4$  [M-H]<sup>+</sup>: 351.0850, found 351.0857.

**(E)-1-(2-Hydroxy-4,6-dimethoxyphenyl)-3-(3-nitrophenyl)prop-2-en-1-one (12)**

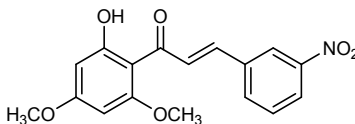

The title compound was prepared according to General Procedure A from xanthoxyline and 3-nitrobenzaldehyde for a reaction time of 12 h and purified by recrystallization (MeOH) to afford a yellow solid (261.8 mg, 79.5%).

m.p. 162-163 °C (MeOH);

$R_f$  = 0.33 (20% EtOAc/hexane);

IR (film) 2940, 1636, 1607 (C=O), 1574 (N-O), 1508, 1418, 1342 (N-O), 1263, 1217 (C-O), 1109  $\text{cm}^{-1}$ ;

$^1\text{H}$  NMR (500 MHz,  $\text{CDCl}_3$ )  $\delta$  14.09 (1H, s, OH), 8.46 (1H, t,  $J = 1.9$  Hz, ArH), 8.22 (1H, ddd,  $J = 8.2, 2.2, 0.9$  Hz, ArH), 7.98 (1H, d,  $J = 15.6$  Hz, CH=CH), 7.89-7.84 (1H, m, ArH), 7.75 (1H, d,  $J = 15.6$  Hz, CH=CH), 7.59 (1H, t,  $J = 8.0$  Hz, ArH), 6.12 (1H, d,  $J = 2.4$  Hz, ArH), 5.99 (1H, d,  $J = 2.4$  Hz, ArH), 3.95 (3H, s,  $\text{OCH}_3$ ), 3.85 (3H, s,  $\text{OCH}_3$ );

$^{13}\text{C}$  NMR (125.8 MHz,  $\text{CDCl}_3$ )  $\delta$  191.85 (C=O), 168.52 (C), 166.71 (C), 162.51 (C), 148.72 (C), 138.80 (CH), 137.45 (C), 134.11 (CH), 130.52 (CH), 129.87 (CH), 124.09 (CH), 122.18 (CH), 106.23 (C), 93.87 (CH), 91.42 (CH), 55.98 ( $\text{CH}_3$ ), 55.65 ( $\text{CH}_3$ ).

The NMR data were in agreement with the literature.<sup>2-3, 12-13</sup>

**(E)-4-(3-(2-Hydroxy-4,6-dimethoxyphenyl)-3-oxoprop-1-enyl)benzoic acid (13)**

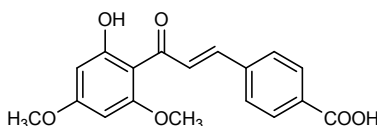

The title compound was prepared according to General Procedure A from xanthoxylene and 4-formylbenzoic acid for a reaction time of 48 h and purified by recrystallization (MeOH) to afford a yellow solid (89.9 mg, 27.4%).

m.p. 237-238 °C (MeOH);

$R_f = 0.23$  (40% EtOAc/hexane);

IR (film) 2943, 1692, 1606 (C=O), 1566, 1425, 1344, 1269, 1217, 1159, 1114  $\text{cm}^{-1}$ ;

$^1\text{H}$  NMR (500 MHz,  $\text{DMSO}_{d-6}$ )  $\delta$  13.33 (1H, s, OH), 13.11 (1H, brs, COOH), 8.02-7.96 (2H, m, ArH), 7.86-7.80 (3H, m, CH=CH and ArH), 7.66 (1H, dd,  $J = 15.7$  Hz, CH=CH), 6.15 (2H, dd,  $J = 12.6, 2.1$  Hz, ArH), 3.89 (3H, s,  $\text{OCH}_3$ ), 3.83 (3H, s,  $\text{OCH}_3$ );

$^{13}\text{C}$  NMR (125.8 MHz,  $\text{DMSO}_{d-6}$ )  $\delta$  192.10 (C=O), 166.80 (C=O), 165.80 (C), 165.53 (C), 161.98 (C), 140.58 (CH), 138.91 (C), 131.93 (C), 129.85 (2  $\times$  CH), 129.67 (CH), 128.43 (2  $\times$  CH), 106.34 (C), 93.91 (CH), 91.17 (CH), 56.28 ( $\text{CH}_3$ ), 55.71 ( $\text{CH}_3$ ) (Figure S8).

HRMS (ESI) Exact mass calcd for  $\text{C}_{18}\text{H}_{15}\text{O}_6$   $[\text{M}-\text{H}]^+$ : 327.0874, found 327.0880.

**(E)-2-(2-(3-(2-Hydroxy-4,6-dimethoxyphenyl)-3-oxoprop-1-enyl)phenoxy)acetic acid (14)**

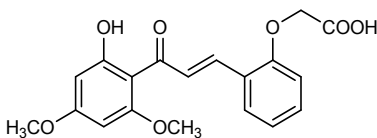

The title compound was prepared according to General Procedure A from xanthoxylene and 2-(2-formylphenoxy)acetic acid for a reaction time of 96 h and purified by recrystallization (MeOH) to afford an orange solid (221.4 mg, 61.8%).

m.p. 147-148 °C (MeOH);

$R_f = 0.18$  (50% EtOAc/hexane);

IR (film) 2914, 1740, 1620 (C=O), 1581, 1570, 1342, 1215, 1157, 1113, 750  $\text{cm}^{-1}$ ;

$^1\text{H}$  NMR (500 MHz, DMSO- $d_6$ )  $\delta$  13.52 (1H, s, OH), 13.13 (1H, brs, COOH), 7.98 (1H, d,  $J$  = 15.9 Hz, CH=CH), 7.86 (1H, d,  $J$  = 15.8 Hz, CH=CH), 7.72 (1H, dd,  $J$  = 7.7, 1.5 Hz, ArH), 7.42-7.37 (1H, m, ArH), 7.04 (1H, t,  $J$  = 7.5 Hz, ArH), 7.00 (1H, d,  $J$  = 8.4 Hz, ArH), 6.14 (2H, dd,  $J$  = 11.9, 2.3 Hz, ArH), 4.83 (2H, s, CH<sub>2</sub>), 3.88 (3H, s, CH<sub>3</sub>), 3.82 (3H, s, CH<sub>3</sub>).

$^{13}\text{C}$  NMR (125.8 MHz, DMSO- $d_6$ )  $\delta$  192.57 (C=O), 169.91 (C=O), 165.69 (C), 165.59 (C), 162.00 (C), 156.68 (C), 137.23 (CH), 131.75 (CH), 128.72 (CH), 127.89 (CH), 123.48 (C), 121.35 (CH), 112.56 (CH), 106.34 (C), 93.88 (CH), 91.09 (CH), 64.80 (CH<sub>2</sub>), 56.14 (CH<sub>3</sub>), 55.67 (CH<sub>3</sub>) (Figure S9).

HRMS (ESI) Exact mass calcd for C<sub>19</sub>H<sub>17</sub>O<sub>7</sub> [M-H]<sup>+</sup>: 357.0980, found 357.0983.

**(E)-3-(4-(Dimethylamino)phenyl)-1-(2-hydroxy-4,6-dimethoxyphenyl)prop-2-en-1-one (15)**

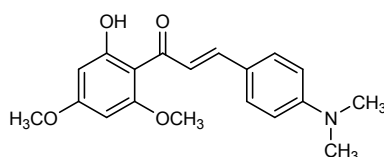

The title compound was prepared according to General Procedure A from xanthoxyline and 4-(*N,N*-dimethylamino)benzaldehyde for a reaction time of 96 h and purified by recrystallization (MeOH) to afford a red solid (133.9 mg, 40.9%).

m.p. 193-194 °C (MeOH);

R<sub>f</sub> = 0.33 (20% EtOAc/hexane);

IR (film) 2940, 1620, 1685 (C=O), 1525, 1433, 1362, 1207, 1153, 1111, 808 cm<sup>-1</sup>;

$^1\text{H}$  NMR (500 MHz, CDCl<sub>3</sub>)  $\delta$  14.67 (1H, s, OH), 7.84 (1H, d,  $J$  = 15.4 Hz, CH=CH), 7.76 (1H, d,  $J$  = 15.4 Hz, CH=CH), 7.55-7.50 (2H, m, ArH), 6.73-6.68 (2H, m, ArH), 6.11 (1H, d,  $J$  = 2.4 Hz, ArH), 5.97 (1H, d,  $J$  = 2.4 Hz, ArH), 3.92 (3H, s, OCH<sub>3</sub>), 3.83 (3H, s, OCH<sub>3</sub>), 3.04 (6H, s, 2 × CH<sub>3</sub>);

$^{13}\text{C}$  NMR (125.8 MHz, CDCl<sub>3</sub>)  $\delta$  192.44 (C=O), 168.27 (C=O), 165.59 (C), 162.36 (C), 151.82 (C), 143.95 (CH), 130.33 (2 × CH), 123.37 (C), 122.06 (CH), 111.85 (2 × CH), 106.43 (C), 93.80 (CH), 91.09 (CH), 55.74 (CH<sub>3</sub>), 55.47 (CH<sub>3</sub>), 40.10 (2 × CH<sub>3</sub>).

The NMR data were in agreement with the literature.<sup>7</sup>

**(E)-3-(Furan-2-yl)-1-(2-hydroxy-4,6-dimethoxyphenyl)prop-2-en-1-one (16)**

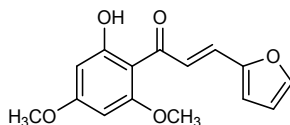

The title compound was prepared according to General Procedure A from xanthoxyline and furan-2-carbaldehyde for a reaction time of 24 h and purified by recrystallization (MeOH) to afford an orange solid (170 mg, 62%).

m.p. 93-94 °C (MeOH);

$R_f$  = 0.59 (30% EtOAc/hexane);

IR (film) 2941, 1616 (C=O), 1578, 1547, 1313, 1335, 1279, 1217 (C-O), 1157, 1113  $\text{cm}^{-1}$ ;

$^1\text{H}$  NMR ( $\text{CDCl}_3$ , 500 MHz)  $\delta$  14.39 (1H, s, OH), 7.79 (1H, d,  $J$  = 15.4 Hz, CH=CH), 7.58 (1H, d,  $J$  = 15.4 Hz, CH=CH), 7.52-7.50 (1H, m, ArH), 6.67 (1H, d,  $J$  = 3.4 Hz, ArH), 6.50 (1H, dd,  $J$  = 3.4, 1.8 Hz, ArH), 6.10 (1H, d,  $J$  = 2.4 Hz, ArH), 5.95 (1H, d,  $J$  = 2.4 Hz, ArH), 3.91 (3H, s, OCH<sub>3</sub>), 3.83 (3H, s, OCH<sub>3</sub>);

$^{13}\text{C}$  NMR ( $\text{CDCl}_3$ , 125.8 MHz)  $\delta$  192.01 (C=O), 168.35 (C), 166.14 (C), 162.49 (C), 152.22 (C), 144.61 (CH), 128.89 (CH), 124.97 (CH), 115.37 (CH), 112.48 (CH), 106.27 (C), 93.71 (CH), 91.14 (CH), 55.71 (CH<sub>3</sub>), 55.50 (CH<sub>3</sub>).

The NMR data were in agreement with the literature.<sup>2-3</sup>

**(E)-1-(2-Hydroxy-4,6-dimethoxyphenyl)-3-(1-methyl-1H-pyrrol-2-yl)prop-2-en-1-one (17)**

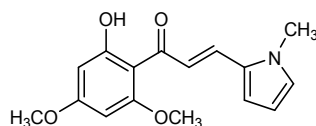

The title compound was prepared according to General Procedure A from xanthoxyline and *N*-methyl-2-pyrrolicarboxaldehyde for a reaction time of 48 h and purified by flash column chromatography (10% ethyl acetate in hexane) to afford an orange solid (50 mg, 17 %).

m.p. 133-134 °C (MeOH);

$R_f$  = 0.45 (10% EtOAc/hexane);

IR (film) 2922, 1613 (C=O), 1549, 1477, 1334, 1269, 1213 (C-O), 1155, 814, 732  $\text{cm}^{-1}$ ;

$^1\text{H}$  NMR (500 MHz,  $\text{CDCl}_3$ )  $\delta$  14.60 (1H, s, OH), 7.82 (1H, d,  $J$  = 15.3 Hz, CH=CH), 7.70 (1H, d,  $J$  = 15.3 Hz, CH=CH), 6.81-6.78 (1H, m, ArH), 6.77 (1H, dd,  $J$  = 3.9, 1.4 Hz, ArH), 6.22 (1H, dd,  $J$  = 3.5, 2.7 Hz, ArH), 6.11 (1H, d,  $J$  = 2.4 Hz, ArH), 5.96 (1H, d,  $J$  = 2.4 Hz, ArH), 3.90 (3H, s, CH<sub>3</sub>), 3.84 (3H, s, CH<sub>3</sub>), 3.77 (3H, s, CH<sub>3</sub>);

$^{13}\text{C}$  NMR (125.8 MHz,  $\text{CDCl}_3$ )  $\delta$  191.98 (C=O), 168.27 (C), 165.73 (C), 162.38 (C), 130.86 (C), 130.73 (CH), 127.59 (CH), 122.26 (CH), 112.56 (CH), 109.61 (CH), 106.31 (C), 93.82 (CH), 91.15 (CH), 55.74 (CH<sub>3</sub>), 55.50 (CH<sub>3</sub>), 34.45 (CH<sub>3</sub>) (Figure S10).

HRMS (ESI) Exact mass calcd for  $\text{C}_{16}\text{H}_{17}\text{NNaO}_4$  [ $\text{M}+\text{Na}$ ]<sup>+</sup>: 310.1050, found 310.1048.

**(E)-1-(2-Hydroxy-4,6-dimethoxyphenyl)-3-(thiophen-2-yl)prop-2-en-1-one (18)**

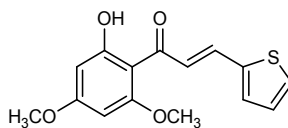

The title compound was prepared according to General Procedure A from xanthoxyline and thiophene-2-carbaldehyde for a reaction time of 24 h and purified by recrystallization (MeOH) to afford an orange solid (143.7 mg, 49.5%).

m.p. 118-119 °C (MeOH);

$R_f$  = 0.69 (30% EtOAc/hexane);

IR (ATR) 3103, 3940, 2349, 1612, 1584, 1549, 1437, 1368, 1209, 1155  $\text{cm}^{-1}$ ;

$^1\text{H}$  NMR ( $\text{CDCl}_3$ , 500 MHz)  $\delta$  14.35 (1H, s, OH), 7.92 (1H, d,  $J$  = 15.3 Hz, CH=CH), 7.74 (1H, d,  $J$  = 15.3 Hz, CH=CH), 7.38 (1H, d,  $J$  = 5.1 Hz, ArH), 7.31 (1H, d,  $J$  = 3.6 Hz, ArH), 7.10-7.04 (1H, m, ArH), 6.10 (1H, d,  $J$  = 2.4 Hz, ArH), 5.95 (1H, d,  $J$  = 2.4 Hz, ArH), 3.91 (3H, s, OCH<sub>3</sub>), 3.83 (3H, s, OCH<sub>3</sub>);

$^{13}\text{C}$  NMR ( $\text{CDCl}_3$ , 125.8 MHz)  $\delta$  191.86 (C=O), 168.37 (C), 166.17 (C), 162.42 (C), 141.21 (C), 134.99 (CH), 131.24 (CH), 128.23 (CH), 128.18 (CH), 126.48 (CH), 106.17 (C), 93.77 (CH), 91.19 (CH), 55.74 (CH<sub>3</sub>), 55.52 (CH<sub>3</sub>) (Figure S11).

HRMS (ESI) Exact mass calcd for  $\text{C}_{15}\text{H}_{14}\text{NaO}_4\text{S}$   $[\text{M}+\text{Na}]^+$ : 313.0505, found 313.0513.

## 2. Spectroscopic data for compounds in Table 2

### (*E*)-2-(2-(3-Oxo-3-(2,4,6-trimethoxyphenyl)prop-1-enyl)phenoxy)acetic acid (14a)

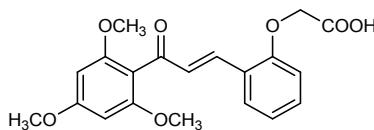

The title compound was prepared according to General Procedure A from 2',4',6'-trimethoxyacetophenone and 2-(2-formylphenoxy)acetic acid for a reaction time of 24 h and purified by recrystallization (MeOH) to afford a pale yellow solid (233 mg, 62.6%).

m.p. 148-149 °C (MeOH);

$R_f$  = 0.24 (EtOAc)

IR (film) 2941, 1754, 1665, 1580 (C=O), 1566, 1414, 1342, 1161, 1132, 754  $\text{cm}^{-1}$ ;

$^1\text{H}$  NMR (500 MHz, DMSO- $d_6$ )  $\delta$  13.08 (1H, brs, COOH), 7.67 (1H, dd,  $J$  = 7.7, 1.4 Hz, ArH), 7.57 (1H, d,  $J$  = 16.3 Hz, CH=CH), 7.39-7.34 (1H, m, ArH), 7.03 (1H, d,  $J$  = 16.3 Hz, CH=CH), 6.99 (1H, t,  $J$  = 7.6 Hz, ArH), 6.95 (1H, d,  $J$  = 8.3 Hz, ArH), 6.30 (2H, s, ArH), 4.76 (2H, s, CH<sub>2</sub>), 3.83 (3H, s, CH<sub>3</sub>), 3.72 (6H, s, 2  $\times$  CH<sub>3</sub>).

$^{13}\text{C}$  NMR (125.8 MHz, DMSO- $d_6$ )  $\delta$  193.44 (C=O), 169.85 (C=O), 161.90 (C), 158.11 (2  $\times$  C), 156.36 (C), 138.35 (CH), 131.76 (CH), 129.51 (CH), 128.76 (CH), 123.04 (C), 121.28 (CH), 112.52 (CH), 111.33 (C), 91.13 (2  $\times$  CH), 64.80 (CH<sub>2</sub>), 55.78 (2  $\times$  CH<sub>3</sub>), 55.44 (CH<sub>3</sub>) (Figure S12).

HRMS (ESI) Exact mass calcd for  $\text{C}_{20}\text{H}_{21}\text{O}_7$   $[\text{M}+\text{H}]^+$ : 373.1287, found 373.1288.

**(E)-2-(2-(3-Oxo-3-(3,4,5-trimethoxyphenyl)prop-1-enyl)phenoxy)acetic acid (14b)**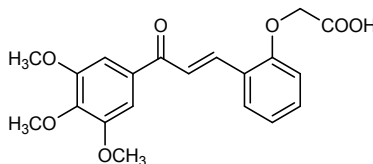

The title compound was prepared according to General Procedure A from 3',4',5'-trimethoxyacetophenone and 2-(2-formylphenoxy)acetic acid for a reaction time of 24 h and purified by recrystallization (MeOH) to afford a pale yellow solid (217.6 mg, 58.4%).

m.p. 179-180 °C (MeOH);

$R_f = 0.29$  (20% MeOH/EtOAc)

IR (film) 2941, 1755, 1649, 1572 (C=O), 1566, 1414, 1342, 1161, 1126, 756  $\text{cm}^{-1}$ ;

$^1\text{H}$  NMR (500 MHz, DMSO- $d_6$ )  $\delta$  13.13 (1H, brs, COOH), 8.14 (1H, d,  $J = 15.7$  Hz, CH=CH), 8.02 (1H, d,  $J = 15.7$  Hz, CH=CH), 7.94-7.89 (1H, m, ArH), 7.46-7.39 (3H, m, ArH), 7.09-7.03 (2H, m, ArH), 4.86 (2H, s, CH<sub>2</sub>), 3.90 (6H, s, 2  $\times$  CH<sub>3</sub>), 3.77 (3H, s, CH<sub>3</sub>).

$^{13}\text{C}$  NMR (125.8 MHz, DMSO- $d_6$ )  $\delta$  188.27 (C=O), 169.91 (C=O), 156.88 (C), 152.94 (2  $\times$  C), 141.91 (C), 139.14 (CH), 133.19 (C), 131.95 (CH), 130.34 (CH), 123.26 (C), 122.62 (CH), 121.21 (CH), 112.60 (CH), 106.06 (2  $\times$  CH), 64.91 (CH<sub>2</sub>), 60.19 (CH<sub>3</sub>), 56.18 (2  $\times$  CH<sub>3</sub>) (Figure S13).

HRMS (ESI) Exact mass calcd for C<sub>20</sub>H<sub>21</sub>O<sub>7</sub> [M+H]<sup>+</sup>: 373.1287, found 373.1280.

**(E)-2-(2-(3-(2-Hydroxy-4-methoxyphenyl)-3-oxoprop-1-enyl)phenoxy)acetic acid (14c)**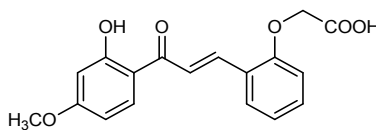

The title compound was prepared according to General Procedure A from 2'-hydroxy-4'-methoxyacetophenone and 2-(2-formylphenoxy)acetic acid for a reaction time of 48 h and purified by recrystallization (MeOH) to afford a yellow solid (156.7 mg, 47.7%).

m.p. 191-192 °C (MeOH);

$R_f = 0.23$  (20% MeOH/EtOAc)

IR (film) 2930, 1744, 1632, 1568 (C=O), 1443, 1364, 1234, 1219, 1132, 758  $\text{cm}^{-1}$ ;

$^1\text{H}$  NMR (500 MHz, DMSO- $d_6$ )  $\delta$  13.55 (1H, s, OH), 13.26 (1H, brs, COOH), 8.30 (1H, d,  $J = 9.1$  Hz, ArH), 8.23 (1H, d,  $J = 15.6$  Hz, CH=CH), 8.09 (1H, d,  $J = 15.6$  Hz, CH=CH), 7.92 (1H, dd,  $J = 8.0, 1.4$  Hz, ArH), 7.46-7.40 (1H, m, ArH), 7.09-7.04 (2H, m, ArH), 6.55 (1H, dd,  $J = 8.9, 2.5$  Hz, ArH), 6.52 (1H, dd,  $J = 2.5$  Hz, ArH), 4.86 (2H, s, CH<sub>2</sub>), 3.85 (3H, s, CH<sub>3</sub>).

$^{13}\text{C}$  NMR (125.8 MHz, DMSO- $d_6$ )  $\delta$  192.28 (C=O), 170.00 (C=O), 165.96 (C), 165.86 (C), 157.02 (C), 139.59 (CH), 132.51 (CH), 132.26 (CH), 130.71 (CH), 123.01 (C), 121.75 (CH),

121.27 (CH), 113.93 (C), 112.67 (CH), 107.39 (CH), 100.98 (CH), 64.99 (CH<sub>2</sub>), 55.75 (CH<sub>3</sub>) (Figure S14).

HRMS (ESI) Exact mass calcd for C<sub>18</sub>H<sub>17</sub>O<sub>6</sub> [M+H]<sup>+</sup>: 329.1025, found 329.1026.

**(E)-2-(2-(3-(4-(Dimethylamino)phenyl)-3-oxoprop-1-enyl)phenoxy)acetic acid (14d)**

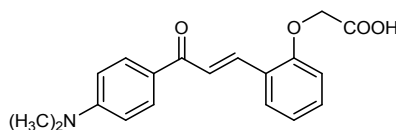

The title compound was prepared according to General Procedure A from 4'-(*N,N*-dimethylamino)acetophenone and 2-(2-formylphenoxy)acetic acid for a reaction time of 48 h and purified by recrystallization (MeOH) to afford a yellow solid (182.2 mg, 56%).

m.p. 163-164 °C (MeOH);

R<sub>f</sub> = 0.18 (20% MeOH/EtOAc)

IR (film) 2914, 1742, 1599 (C=O), 1535, 1485, 1375, 1344, 1285, 1188, 1171 cm<sup>-1</sup>;

<sup>1</sup>H NMR (500 MHz, CD<sub>3</sub>OD) δ 8.14 (1H, d, *J* = 15.7 Hz, CH=CH), 8.11-8.07 (2H, m, ArH), 7.98 (1H, d, *J* = 15.7 Hz, CH=CH), 7.69 (1H, dd, *J* = 7.7, 1.6 Hz, ArH), 7.37 (1H, ddd, *J* = 8.4, 7.5, 1.7 Hz, ArH), 7.05 (1H, td, *J* = 7.5, 0.8 Hz, ArH), 6.99 (1H, d, *J* = 8.0 Hz, ArH), 6.81-6.76 (2H, m, ArH), 4.81 (2H, s, CH<sub>2</sub>), 3.09 (6H, s, N(CH<sub>3</sub>)<sub>2</sub>);

<sup>13</sup>C NMR (125.8 MHz, CD<sub>3</sub>OD) δ 190.86 (C=O), 171.98 (C=O), 158.64 (C), 155.45 (C), 139.83 (CH), 132.39 (CH), 132.34 (2 × CH), 131.78 (CH), 126.85 (C), 125.74 (C), 124.84 (CH), 122.69 (CH), 113.43 (CH), 112.04 (2 × CH), 66.32 (CH<sub>2</sub>), 40.12 (2 × CH<sub>3</sub>) (Figure S15).

HRMS (ESI) Exact mass calcd for C<sub>19</sub>H<sub>20</sub>NO<sub>4</sub> [M+H]<sup>+</sup>: 326.1392, found 326.1390.

**(E)-2-(2-(3-(1-Methyl-1*H*-pyrrol-2-yl)-3-oxoprop-1-enyl)phenoxy)acetic acid (14e)**

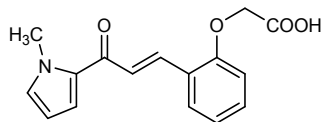

The title compound was prepared according to General Procedure A from 2-acetyl-1-methyl pyrrole and 2-(2-formylphenoxy)acetic acid for a reaction time of 48 h and purified by recrystallization (MeOH) to afford a pale yellow solid (89.1 mg, 31.2%).

m.p. 168-169 °C (MeOH);

R<sub>f</sub> = 0.18 (20% MeOH/EtOAc)

IR (film) 3718, 2924, 2338, 1736, 1641, 1587 (C=O), 1408, 1217, 1111, 746 cm<sup>-1</sup>;

<sup>1</sup>H NMR (500 MHz, CD<sub>3</sub>OD) δ 7.95 (1H, d, *J* = 15.8 Hz, CH=CH), 7.90 (1H, d, *J* = 15.8 Hz, CH=CH), 7.64 (1H, dd, *J* = 7.7, 1.6 Hz, ArH), 7.42 (1H, dd, *J* = 4.2, 1.7 Hz, ArH), 7.33 (1H, ddd, *J* = 8.4, 7.5, 1.8 Hz, ArH), 7.04-7.02 (1H, m, ArH), 7.00 (1H, td, *J* = 7.6, 0.8 Hz, ArH),

6.96 (1H, d,  $J = 8.3$  Hz, ArH), 6.20 (1H, dd,  $J = 4.2, 2.5$  Hz, ArH), 4.65 (2H, s, CH<sub>2</sub>), 3.99 (3H, s, CH<sub>3</sub>);

<sup>13</sup>C NMR (125.8 MHz, CD<sub>3</sub>OD)  $\delta$  182.47 (C=O), 174.04 (C=O), 159.02 (C), 138.60 (CH), 133.71 (CH), 133.42 (C), 132.21 (CH), 131.33 (CH), 126.23 (CH), 125.52 (C), 122.25 (CH), 122.06 (CH), 113.57 (CH), 109.58 (CH), 67.70 (CH<sub>2</sub>), 37.95 (CH<sub>3</sub>) (Figure S16).

HRMS (ESI) Exact mass calcd for C<sub>16</sub>H<sub>15</sub>NNaO<sub>4</sub> [M+Na]<sup>+</sup>: 308.0899, found 308.0897.

**(E)-2-(2-(3-Oxo-3-(thiophen-2-yl)prop-1-enyl)phenoxy)acetic acid (14f)**

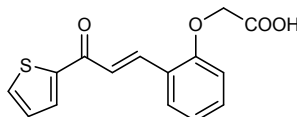

The title compound was prepared according to General Procedure B from 2-acetylthiophene and 2-(2-formylphenoxy)acetic acid and purified by recrystallization (MeOH) to afford a light brown solid (355.2 mg, 61.6%).

m.p. 160-161 °C (MeOH);

R<sub>f</sub> = 0.38 (EtOAc)

IR (film) 3090, 1748, 1641 (C=O), 1589, 1572, 1412, 1354, 1217, 1065, 752 cm<sup>-1</sup>;

<sup>1</sup>H NMR (500 MHz, DMSO-d<sub>6</sub>)  $\delta$  13.25 (1H, brs, COOH), 8.33 (1H, dd,  $J = 3.8, 1.0$  Hz, ArH), 8.13 (1H, d,  $J = 15.7$  Hz, CH=CH), 8.05 (1H, dd,  $J = 4.9, 1.1$  Hz, ArH), 7.98 (1H, d,  $J = 15.7$  Hz, CH=CH), 7.88 (1H, dd,  $J = 8.0, 1.4$  Hz, ArH), 7.45-7.39 (1H, m, ArH), 7.30 (1H, dd,  $J = 4.9, 3.8$  Hz, ArH), 7.08-7.03 (2H, m, ArH), 4.86 (2H, s, CH<sub>2</sub>).

<sup>13</sup>C NMR (125.8 MHz, DMSO-d<sub>6</sub>)  $\delta$  182.02 (C=O), 170.06 (C=O), 156.97 (C), 145.85 (C), 138.57 (CH), 135.42 (CH), 133.28 (CH), 132.05 (CH), 130.59 (CH), 128.87 (CH), 122.98 (C), 122.71 (CH), 121.26 (CH), 112.65 (C), 64.97 (CH<sub>2</sub>) (Figure S17).

HRMS (ESI) Exact mass calcd for C<sub>15</sub>H<sub>12</sub>NaO<sub>4</sub>S [M+Na]<sup>+</sup>: 311.0354, found 311.0351.

**(E)-3-(4-(Dimethylamino)phenyl)-1-(2,4,6-trimethoxyphenyl)prop-2-en-1-one (15a)**

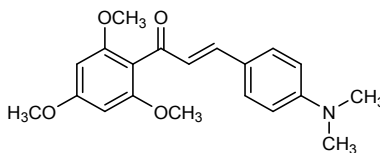

The title compound was prepared according to General Procedure A from 2',4',6'-trimethoxyacetophenone and 4-(*N,N*-dimethylamino)benzaldehyde for a reaction time of 48 h and purified by recrystallization (MeOH) to afford a yellow solid (247.5 mg, 72.5%).

m.p. 143-144 °C (MeOH);

R<sub>f</sub> = 0.26 (30% EtOAc/hexane);

IR (film) 2938, 1637, 1585 (C=O), 1522, 1224, 1153, 1123 (C-O), 1020, 945, 814 cm<sup>-1</sup>;



$^1\text{H}$  NMR (500 MHz,  $\text{CDCl}_3$ )  $\delta$  7.42-7.38 (2H, m, ArH), 7.27 (1H, d,  $J = 15.9$  Hz, CH=CH), 6.79 (1H, d,  $J = 15.9$  Hz, CH=CH), 6.66-6.62 (2H, m, ArH), 6.16 (2H, s, ArH), 3.85 (3H, s,  $\text{OCH}_3$ ), 3.75 (6H, s,  $\text{OCH}_3$ ), 3.01 (6H, s,  $\text{N}(\text{CH}_3)_2$ );

$^{13}\text{C}$  NMR (125.8 MHz,  $\text{CDCl}_3$ )  $\delta$  194.51 (C=O), 161.92 (C), 158.51 ( $2 \times$  C), 151.76 (C), 145.76 (CH), 130.13 ( $2 \times$  CH), 124.38 (CH), 112.57 (C), 112.29 (C), 111.70 ( $2 \times$  CH), 90.70 ( $2 \times$  CH), 55.84 ( $2 \times$   $\text{CH}_3$ ), 55.36 ( $\text{CH}_3$ ), 40.03 ( $2 \times$   $\text{CH}_3$ ).

The NMR data were in agreement with the literature.<sup>1</sup>

**(E)-3-(4-(Dimethylamino)phenyl)-1-(3,4,5-trimethoxyphenyl)prop-2-en-1-one (15b)**

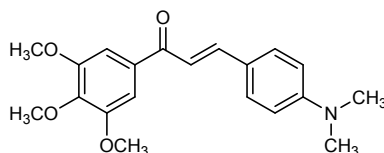

The title compound was prepared according to General Procedure A from 3',4',5'-trimethoxyacetophenone and 4-(*N,N*-dimethylamino)benzaldehyde for a reaction time of 24 h and purified by recrystallization (MeOH) to afford a yellow solid (260.1 mg, 76.2%).

m.p. 142-143 °C (MeOH);

$R_f = 0.32$  (30% EtOAc/hexane);

IR (film) 2938, 1564 (C=O), 1522, 1503, 1412, 1341, 1151, 1123 (C-O), 812, 731  $\text{cm}^{-1}$ ;  $^1\text{H}$  NMR (500 MHz,  $\text{CDCl}_3$ )  $\delta$  7.80 (1H, d,  $J = 15.4$  Hz, CH=CH), 7.57-7.54 (2H, m, ArH), 7.31-7.25 (2H, m, ArH and CH=CH), 6.71-6.67 (2H, m, ArH), 3.94 (6H, s,  $\text{OCH}_3$ ), 3.93 (3H, s,  $\text{OCH}_3$ ), 3.04 (6H, s,  $\text{N}(\text{CH}_3)_2$ );

$^{13}\text{C}$  NMR (125.8 MHz,  $\text{CDCl}_3$ )  $\delta$  189.32 (C=O), 152.99 ( $2 \times$  C), 152.00 (C), 145.69 (CH), 141.88 (C), 134.40 (C), 130.34 ( $2 \times$  CH), 122.57 (C), 116.49 (CH), 111.76 ( $2 \times$  CH), 105.85 ( $2 \times$  CH), 60.87 ( $\text{CH}_3$ ), 56.30 ( $2 \times$   $\text{CH}_3$ ), 40.03 ( $2 \times$   $\text{CH}_3$ ).

The NMR data were in agreement with the literature.<sup>14</sup>

**(E)-3-(4-(Dimethylamino)phenyl)-1-(2-hydroxy-4-methoxyphenyl)prop-2-en-1-one (15c)**

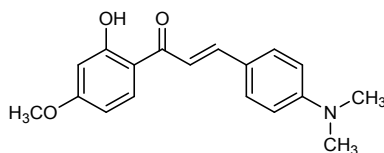

The title compound was prepared according to General Procedure A from 2'-hydroxy-4'-methoxyacetophenone and 4-(*N,N*-dimethylamino)benzaldehyde for a reaction time of 48 h and purified by recrystallization (MeOH) to afford a red solid (121 mg, 40.7%).

m.p. 154-155 °C (MeOH);

$R_f = 0.19$  (10% EtOAc/hexane);

IR (film) 2903, 1624, 1602 (C=O), 1543, 1519, 1435, 1356, 1209, 1123 (C-O), 798  $\text{cm}^{-1}$ ;

$^1\text{H}$  NMR (500 MHz,  $\text{CDCl}_3$ )  $\delta$  13.81 (1H, s, OH), 7.88 (1H, d,  $J = 15.2$  Hz, CH=CH), 7.86-7.82 (1H, m, ArH), 7.58-7.54 (2H, m, ArH), 7.38 (1H, d,  $J = 15.2$  Hz, CH=CH), 6.72-6.68 (2H, m, ArH), 7.50-7.46 (2H, m, ArH), 3.85 (3H, s,  $\text{OCH}_3$ ), 3.05 (6H, s,  $\text{N}(\text{CH}_3)_2$ );

$^{13}\text{C}$  NMR (125.8 MHz,  $\text{CDCl}_3$ )  $\delta$  191.86 (C=O), 166.44 (C), 165.64 (C), 152.13 (C), 145.39 (CH), 130.91 (CH), 130.57 (2  $\times$  CH), 122.50 (C), 114.53 (CH), 114.33 (C), 111.78 (2  $\times$  CH), 107.06 (CH), 101.03 (CH), 55.47 ( $\text{CH}_3$ ), 40.05 (2  $\times$   $\text{CH}_3$ ) (Figure S18).

HRMS (ESI) Exact mass calcd for  $\text{C}_{18}\text{H}_{19}\text{NNaO}_3$   $[\text{M}+\text{Na}]^+$ : 320.1257, found 320.1259.

**(E)-1,3-bis(4-(Dimethylamino)phenyl)prop-2-en-1-one (15d)**

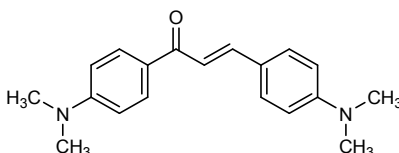

The title compound was prepared according to General Procedure A from 4'-(*N,N*-dimethylamino)acetophenone and 4-(*N,N*-dimethylamino)benzaldehyde for a reaction time of 48 h and purified by recrystallization (MeOH) to afford an orange solid (187.9 mg, 63.8%).

m.p. 146-147  $^{\circ}\text{C}$  (MeOH);

$R_f = 0.40$  (30% EtOAc/hexane);

IR (film) 2897, 1638, 1595 (C=O), 1570, 1521, 1366, 1238, 1163, 806, 732  $\text{cm}^{-1}$ ;

$^1\text{H}$  NMR (500 MHz,  $\text{CDCl}_3$ )  $\delta$  8.04-7.99 (2H, m, ArH), 7.78 (1H, d,  $J = 15.4$  Hz, CH=CH), 7.58-7.53 (2H, m, ArH), 7.42 (1H, d,  $J = 15.4$  Hz, CH=CH), 6.73-6.67 (4H, m, ArH), 3.06 (6H, s, 2  $\times$   $\text{CH}_3$ ), 3.03 (6H, s, 2  $\times$   $\text{CH}_3$ );

$^{13}\text{C}$  NMR (125.8 MHz,  $\text{CDCl}_3$ )  $\delta$  188.02 (C=O), 153.06 (C), 151.60 (C), 143.38 (CH), 130.47 (2  $\times$  CH), 129.92 (2  $\times$  CH), 126.65 (C), 123.27 (C), 117.05 (CH), 111.82 (2  $\times$  CH), 110.75 (2  $\times$  CH), 40.09 (2  $\times$   $\text{CH}_3$ ), 39.98 (2  $\times$   $\text{CH}_3$ ) (Figure S19).

HRMS (ESI) Exact mass calcd for  $\text{C}_{19}\text{H}_{22}\text{N}_2\text{NaO}$   $[\text{M}+\text{Na}]^+$ : 317.1624, found 317.1614.

**(E)-3-(4-(Dimethylamino)phenyl)-1-(1-methyl-1H-pyrrol-2-yl)prop-2-en-1-one (15e)**

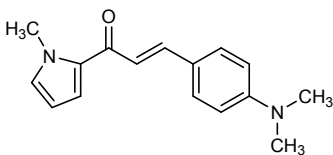

The title compound was prepared according to General Procedure A from 2-acetyl-1-methylpyrrole and 4-(*N,N*-dimethylamino)benzaldehyde for a reaction time of 48 h and purified by recrystallization (MeOH) to afford an orange solid (94.9 mg, 37.3%).

m.p. 91-92  $^{\circ}\text{C}$  (MeOH);

$R_f = 0.43$  (20% EtOAc/hexane);

IR (film) 2857, 1638, 1568 (C=O), 1524, 1404, 1361, 1182, 1063, 987  $\text{cm}^{-1}$ ;

$^1\text{H}$  NMR (500 MHz,  $\text{CDCl}_3$ )  $\delta$  7.71 (1H, d,  $J = 15.5$  Hz,  $\text{CH}=\text{CH}$ ), 7.55-7.50 (2H, m, ArH), 7.24 (1H, d,  $J = 15.5$  Hz,  $\text{CH}=\text{CH}$ ), 7.09 (1H, dd,  $J = 4.1, 1.7$  Hz, ArH), 6.85 (1H, t,  $J = 1.9$  Hz, ArH), 6.73-6.68 (2H, m, ArH), 6.19 (1H, dd,  $J = 4.1, 2.5$  Hz, ArH), 4.04 (3H, s,  $\text{CH}_3$ ), 3.04 (6H, s,  $2 \times \text{CH}_3$ );

$^{13}\text{C}$  NMR (125.8 MHz,  $\text{CDCl}_3$ )  $\delta$  180.37 (C=O), 151.61 (C=O), 142.21 (CH), 132.36 (C), 130.88 (CH), 129.88 ( $2 \times \text{CH}$ ), 123.07 (C), 118.61 (CH), 118.24 (CH), 111.85 ( $2 \times \text{CH}$ ), 107.88 (CH), 40.13 ( $2 \times \text{CH}_3$ ), 37.70 ( $\text{CH}_3$ ) (Figure S20).

HRMS (ESI) Exact mass calcd for  $\text{C}_{16}\text{H}_{18}\text{N}_2\text{NaO}$   $[\text{M}+\text{Na}]^+$ : 277.1311, found 277.1309.

**(E)-3-(4-(Dimethylamino)phenyl)-1-(thiophen-2-yl)prop-2-en-1-one (15f)**

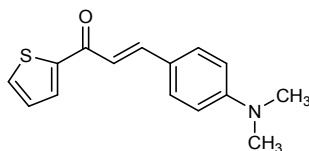

The title compound was prepared according to General Procedure A from 2-acetylthiophene and 4-(*N,N*-dimethylamino)benzaldehyde for a reaction time of 24 h and purified by recrystallization (MeOH) to afford a red solid (78.5 mg, 30.5%).

m.p. 102-103 °C (MeOH);

$R_f = 0.56$  (10% EtOAc/hexane);

IR (film) 3080, 2903, 1635, 1562, 1521 (C=O), 1414, 1352, 1166, 979, 812  $\text{cm}^{-1}$ ;

$^1\text{H}$  NMR (500 MHz,  $\text{CDCl}_3$ )  $\delta$  7.84 (1H, d,  $J = 15.4$  Hz,  $\text{CH}=\text{CH}$ ), 7.84 (1H, dd,  $J = 3.8, 1.1$  Hz, ArH), 7.63 (1H, dd,  $J = 4.9, 1.1$  Hz, ArH), 7.58-7.54 (2H, m, ArH), 7.24 (1H, d,  $J = 15.4$  Hz,  $\text{CH}=\text{CH}$ ), 7.17 (1H, dd,  $J = 4.9, 3.8$  Hz, ArH), 6.73-6.68 (2H, m, ArH), 3.05 (6H, s,  $2 \times \text{CH}_3$ );

$^{13}\text{C}$  NMR (125.8 MHz,  $\text{CDCl}_3$ )  $\delta$  182.12 (C=O), 152.06 (C), 146.32 (C), 144.95 (CH), 132.77 (CH), 130.85 (CH), 130.43 ( $2 \times \text{CH}$ ), 128.00 (CH), 122.47 (C), 116.34 (CH), 111.80 ( $2 \times \text{CH}$ ), 40.09 ( $2 \times \text{CH}_3$ ) (Figure S21).

HRMS (ESI) Exact mass calcd for  $\text{C}_{15}\text{H}_{15}\text{NNaOS}$   $[\text{M}+\text{Na}]^+$ : 280.0767, found 280.0760.

**(E)-3-(1-Methyl-1H-pyrrol-2-yl)-1-(2,4,6-trimethoxyphenyl)prop-2-en-1-one (17a)**

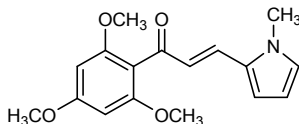

The title compound was prepared according to General Procedure A from 2',4',6'-trimethoxyacetophenone and *N*-methyl-2-pyrrolicarboxaldehyde for a reaction time of 48 h and purified by recrystallization (MeOH) to afford a light green solid (154.1 mg, 51.1 %).

m.p. 115-116 °C (MeOH);

$R_f = 0.29$  (20% EtOAc/hexane);

IR (film) 2940, 1603, 1582 (C=O), 1456, 1410, 1263, 1155, 1123, 1022, 729  $\text{cm}^{-1}$ ;  
 $^1\text{H}$  NMR (500 MHz,  $\text{CDCl}_3$ )  $\delta$  7.37 (1H, d,  $J = 15.7$  Hz, CH=CH), 6.78-6.75 (1H, m, ArH), 6.72 (1H, d,  $J = 15.7$  Hz, CH=CH), 6.68 (1H, dd,  $J = 3.9, 1.5$  Hz, ArH), 6.17 (1H, dd,  $J = 3.7, 2.7$  Hz, ArH), 6.16 (2H, s, ArH), 3.86 (3H, s,  $\text{CH}_3$ ), 3.78 (6H, s,  $2 \times \text{CH}_3$ ), 3.67 (3H, s,  $\text{CH}_3$ );  
 $^{13}\text{C}$  NMR (125.8 MHz,  $\text{CDCl}_3$ )  $\delta$  193.38 (C=O), 162.16 (C), 158.74 ( $2 \times \text{C}$ ), 131.59 (CH), 129.88 (C), 127.49 (CH), 124.17 (CH), 112.80 (CH), 112.52 (C), 109.48 (CH), 90.75 ( $2 \times \text{CH}$ ), 55.91 ( $2 \times \text{CH}_3$ ), 55.40 ( $\text{CH}_3$ ), 34.47 ( $\text{CH}_3$ ) (Figure S22).  
 HRMS (ESI) Exact mass calcd for  $\text{C}_{17}\text{H}_{19}\text{NNaO}_4$   $[\text{M}+\text{Na}]^+$ : 324.1206, found 324.1217.

**(E)-3-(1-Methyl-1H-pyrrol-2-yl)-1-(3,4,5-trimethoxyphenyl)prop-2-en-1-one (17b)**

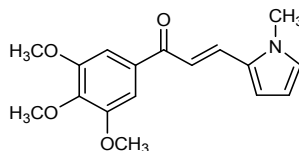

The title compound was prepared according to General Procedure A from 3',4',5'-trimethoxyacetophenone and *N*-methyl-2-pyrrolecarboxaldehyde for a reaction time of 24 h and purified by recrystallization (MeOH) to afford a yellow solid (101.6 mg, 33.7 %).

m.p. 80-81  $^{\circ}\text{C}$  (MeOH);

$R_f = 0.24$  (20% EtOAc/hexane);

IR (film) 2940, 1645, 1560 (C=O), 1479, 1410, 1333, 1269, 1159, 1123, 1057  $\text{cm}^{-1}$ ;

$^1\text{H}$  NMR (500 MHz,  $\text{CDCl}_3$ )  $\delta$  7.82 (1H, d,  $J = 15.1$  Hz, CH=CH), 7.25 (1H, d,  $J = 15.1$  Hz, CH=CH), 6.87 (1H, dd,  $J = 3.9, 1.4$  Hz, ArH), 6.85-6.82 (1H, m, ArH), 6.24 (1H, ddd,  $J = 3.9, 2.5, 0.5$  Hz, ArH), 3.96 (6H,  $2 \times \text{CH}_3$ ), 3.94 (3H,  $\text{CH}_3$ ), 3.78 (3H,  $\text{CH}_3$ );

$^{13}\text{C}$  NMR (125.8 MHz,  $\text{CDCl}_3$ )  $\delta$  188.70 (C=O), 153.09 ( $2 \times \text{C}$ ), 142.14 (C), 134.15 (C), 132.16 (CH), 130.27 (C), 127.83 (CH), 116.47 (CH), 112.26 (CH), 109.76 (CH), 105.82 ( $2 \times \text{CH}$ ), 60.94 ( $\text{CH}_3$ ), 56.37 ( $2 \times \text{CH}_3$ ), 34.35 ( $\text{CH}_3$ ) (Figure S23).

HRMS (ESI) Exact mass calcd for  $\text{C}_{17}\text{H}_{19}\text{NNaO}_4$   $[\text{M}+\text{Na}]^+$ : 324.1206, found 324.1202.

**(E)-1-(2-Hydroxy-4-methoxyphenyl)-3-(1-methyl-1H-pyrrol-2-yl)prop-2-en-1-one (17c)**

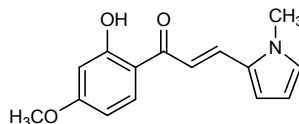

The title compound was prepared according to General Procedure A from 2'-hydroxy-4'-methoxyacetophenone and *N*-methyl-2-pyrrolecarboxaldehyde for a reaction time of 48 h and purified by recrystallization (MeOH) to afford a light green solid (59 mg, 22.9 %).

m.p. 130-131  $^{\circ}\text{C}$  (MeOH);

$R_f = 0.19$  (10% EtOAc/hexane);

IR (film) 3107, 1618, 1545 (C=O), 1481, 1373, 1261, 1217, 1128, 1059, 731  $\text{cm}^{-1}$ ;  
 $^1\text{H}$  NMR (500 MHz,  $\text{CDCl}_3$ )  $\delta$  13.73 (1H, s, OH), 7.87 (1H, d,  $J = 15.0$  Hz, CH=CH), 7.81-7.78 (1H, m, ArH), 7.31 (1H, d,  $J = 15.0$  Hz, CH=CH), 6.88-6.86 (1H, m, ArH), 6.85-6.83 (1H, m, ArH), 6.50-6.46 (2H, m, ArH), 6.25 (1H, ddd,  $J = 4.0, 2.6, 0.6$  Hz, ArH), 3.86 (3H, s,  $\text{CH}_3$ ), 3.79 (3H, s,  $\text{CH}_3$ );  
 $^{13}\text{C}$  NMR (125.8 MHz,  $\text{CDCl}_3$ )  $\delta$  191.47 (C=O), 166.45 (C), 165.80 (C), 131.82 (CH), 130.83 (CH), 130.28 (C), 128.10 (CH), 114.85 (CH), 114.19 (C), 112.74 (CH), 109.97 (CH), 107.44 (CH), 101.05 (CH), 55.52 ( $\text{CH}_3$ ), 34.35 ( $\text{CH}_3$ ) (Figure S24).  
 HRMS (ESI) Exact mass calcd for  $\text{C}_{15}\text{H}_{15}\text{NNaO}_3$   $[\text{M}+\text{Na}]^+$ : 280.0944, found 280.0948.

**(E)-1-(4-(Dimethylamino)phenyl)-3-(1-methyl-1H-pyrrol-2-yl)prop-2-en-1-one (17d)**

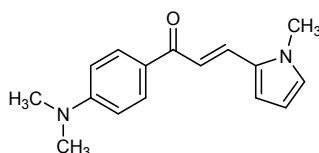

The title compound was prepared according to General Procedure A from 4'-(*N,N*-dimethylamino)acetophenone and *N*-methyl-2-pyrrolecarboxaldehyde for a reaction time of 48 h and purified by recrystallization (MeOH) to afford a yellow solid (86.2 mg, 33.9 %).

m.p. 195-196  $^{\circ}\text{C}$  (MeOH);

$R_f = 0.39$  (30% EtOAc/hexane);

IR (film) 3104, 2916, 1601, 1562 (C=O), 1483, 1377, 1279, 1238, 1190, 820  $\text{cm}^{-1}$ ;  
 $^1\text{H}$  NMR (500 MHz,  $\text{CDCl}_3$ )  $\delta$  8.02-7.98 (2H, m, ArH), 7.79 (1H, d,  $J = 15.2$  Hz, CH=CH), 7.37 (1H, d,  $J = 15.2$  Hz, CH=CH), 6.81 (1H, dd,  $J = 3.9, 1.3$  Hz, ArH), 6.80-6.77 (1H, m, ArH), 6.73-6.68 (2H, m, ArH), 6.23-6.20 (1H, m, ArH), 3.76 (3H, s,  $\text{CH}_3$ ), 3.07 (6H, s,  $2 \times \text{CH}_3$ );  
 $^{13}\text{C}$  NMR (125.8 MHz,  $\text{CDCl}_3$ )  $\delta$  187.40 (C=O), 153.16 (C), 130.62 (C), 130.44 ( $2 \times \text{CH}$ ), 130.19 (CH), 126.83 (CH), 126.40 (C), 117.20 (CH), 111.16 (CH), 110.78 ( $2 \times \text{CH}$ ), 109.30 (CH), 39.99 ( $2 \times \text{CH}_3$ ), 34.28 ( $\text{CH}_3$ ) (Figure S25).

HRMS (ESI) Exact mass calcd for  $\text{C}_{16}\text{H}_{18}\text{N}_2\text{NaO}$   $[\text{M}+\text{Na}]^+$ : 277.1311, found 277.1301.

**(E)-1,3-bis(1-Methyl-1H-pyrrol-2-yl)prop-2-en-1-one (17e)**

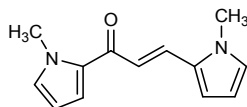

The title compound was prepared according to General Procedure A from 2-acetyl-1-methylpyrrole and *N*-methyl-2-pyrrolecarboxaldehyde for a reaction time of 48 h and purified by recrystallization (MeOH) to afford a light brown solid (44.4 mg, 20.7 %).

m.p. 111-112  $^{\circ}\text{C}$  (MeOH);

$R_f = 0.34$  (20% EtOAc/hexane);

IR (film) 3103, 2943, 1634, 1572 (C=O), 1458, 1400, 1375, 1267, 1045, 723  $\text{cm}^{-1}$ ;  
 $^1\text{H}$  NMR (500 MHz,  $\text{CDCl}_3$ )  $\delta$  7.71 (1H, d,  $J = 15.2$  Hz, CH=CH), 7.18 (1H, d,  $J = 15.2$  Hz, CH=CH), 7.07 (1H, dd, 4.1, 1.6 Hz, ArH), 6.87-6.85 (1H, m, ArH), 6.79-6.76 (2H, m, ArH), 6.23-6.20 (1H, m, ArH), 6.19 (1H, dd,  $J = 4.1, 2.5$  Hz, ArH), 4.04 (3H, s,  $\text{CH}_3$ ), 3.76 (3H, s,  $\text{CH}_3$ );  
 $^{13}\text{C}$  NMR (125.8 MHz,  $\text{CDCl}_3$ )  $\delta$  179.95 (C=O), 132.23 (C), 131.14 (CH), 130.37 (C), 129.10 (CH), 126.80 (CH), 118.92 (CH), 118.43 (CH), 111.16 (CH), 109.33 (CH), 108.06 (CH), 37.75 ( $\text{CH}_3$ ), 34.27 ( $\text{CH}_3$ ) (Figure S26).  
 HRMS (ESI) Exact mass calcd for  $\text{C}_{26}\text{H}_{28}\text{N}_4\text{NaO}_2$  [ $2\text{M}+\text{Na}$ ] $^+$ : 451.2104, found 451.2116.

**(E)-3-(1-Methyl-1H-pyrrol-2-yl)-1-(thiophen-2-yl)prop-2-en-1-one (17f)**

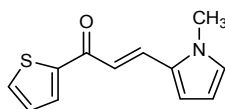

The title compound was prepared according to General Procedure A from 2-acetylthiophene and *N*-methyl-2-pyrrolicarboxaldehyde for a reaction time of 48 h and purified by recrystallization (MeOH) to afford a light brown solid (56.1 mg, 25.8 %).

m.p. 100-101  $^{\circ}\text{C}$  (MeOH);

$R_f = 0.53$  (20% EtOAc/hexane);

IR (film) 3101, 2922, 1633, 1566 (C=O), 1516, 1479, 1408, 1275, 1057, 727  $\text{cm}^{-1}$ ;  
 $^1\text{H}$  NMR (500 MHz,  $\text{CDCl}_3$ )  $\delta$  7.82 (1H, d,  $J = 15.1$  Hz, CH=CH), 7.82 (1H, dd,  $J = 3.8, 1.1$  Hz, ArH), 7.64 (1H, dd,  $J = 4.9, 1.1$  Hz, ArH), 7.20-7.16 (2H, m, CH=CH and ArH), 6.87-6.85 (1H, m, ArH), 6.85-6.81 (1H, m, ArH), 6.24 (1H, ddd,  $J = 3.9, 2.6, 0.5$  Hz, ArH), 3.78 (3H, s,  $\text{CH}_3$ );  
 $^{13}\text{C}$  NMR (125.8 MHz,  $\text{CDCl}_3$ )  $\delta$  181.79 (C=O), 146.11 (C), 133.01 (CH), 131.50 (CH), 130.92 (CH), 130.09 (C), 128.09 (CH), 127.88 (CH), 116.45 (CH), 112.44 (CH), 109.80 (CH), 34.36 ( $\text{CH}_3$ ) (Figure S27).

HRMS (ESI) Exact mass calcd for  $\text{C}_{12}\text{H}_{11}\text{NNaOS}$  [ $\text{M}+\text{Na}$ ] $^+$ : 240.0454, found 240.0461.

**(E)-3-(Thiophen-2-yl)-1-(2,4,6-trimethoxyphenyl)prop-2-en-1-one (18a)**

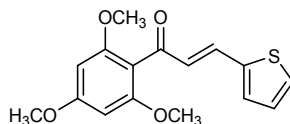

The title compound was prepared according to General Procedure A from 2',4',6'-trimethoxyacetophenone and thiophene-2-carbaldehyde for a reaction time of 24 h and purified by recrystallization (MeOH) to afford a pale yellow solid (203.1 mg, 68.1%).

m.p. 95-96  $^{\circ}\text{C}$  (MeOH);

$R_f = 0.40$  (30% EtOAc/hexane);

IR (film) 2930, 1643, 1601, 1583 (C=O), 1454, 1411, 1267, 1224, 1203, 1123  $\text{cm}^{-1}$ ;  
 $^1\text{H}$  NMR (500 MHz,  $\text{CDCl}_3$ )  $\delta$  7.47 (1H, d,  $J = 15.7$  Hz, CH=CH), 7.38 (1H, d,  $J = 5.1$  Hz, ArH), 7.24-7.21 (1H, m, ArH), 7.04 (1H, dd,  $J = 5.1, 3.6$  Hz, ArH), 6.77 (1H, d,  $J = 15.7$  Hz, CH=CH), 6.16 (2H, s, ArH), 3.86 (3H, s,  $\text{CH}_3$ ), 3.77 (6H, s,  $2 \times \text{CH}_3$ );  
 $^{13}\text{C}$  NMR (125.8 MHz,  $\text{CDCl}_3$ )  $\delta$  193.53 (C), 162.42 (C), 158.83 ( $2 \times \text{C}$ ), 140.36 (C), 136.39 (CH), 131.00 (CH), 128.56 (CH), 128.08 ( $2 \times \text{CH}$ ), 111.64 (C), 90.71 ( $2 \times \text{CH}$ ), 55.88 ( $2 \times \text{CH}_3$ ), 55.40 ( $\text{CH}_3$ ) (Figure S28).  
 HRMS (ESI) Exact mass calcd for  $\text{C}_{16}\text{H}_{16}\text{NaO}_4\text{S}$   $[\text{M}+\text{Na}]^+$ : 327.0662, found 327.0690.

**(E)-3-(Thiophen-2-yl)-1-(3,4,5-trimethoxyphenyl)prop-2-en-1-one (18b)**

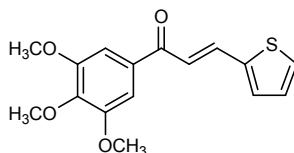

The title compound was prepared according to General Procedure A from 3',4',5'-trimethoxyacetophenone and thiophene-2-carbaldehyde for a reaction time of 12 h and purified by recrystallization (MeOH) to afford a light cream solid (214.3 mg, 70.4%).

m.p. 65-66  $^{\circ}\text{C}$  (MeOH);

$R_f = 0.43$  (20% EtOAc/hexane);

IR (film) 2938, 1649, 1572 (C=O), 1503, 1412, 1329, 1155, 1121, 999, 706  $\text{cm}^{-1}$ ;

$^1\text{H}$  NMR (500 MHz,  $\text{CDCl}_3$ )  $\delta$  7.95 (1H, d,  $J = 15.3$  Hz, CH=CH), 7.44-7.42 (1H, m, ArH), 7.38 (1H, d,  $J = 3.6$  Hz, ArH), 7.28 (1H, d,  $J = 15.3$  Hz, CH=CH), 7.26 (2H, s, ArH), 7.10 (1H, dd,  $J = 5.0, 3.6$  Hz, ArH), 3.95 (6H,  $2 \times \text{CH}_3$ ), 3.94 (3H,  $\text{CH}_3$ );

$^{13}\text{C}$  NMR (125.8 MHz,  $\text{CDCl}_3$ )  $\delta$  188.59 (C=O), 153.14 ( $2 \times \text{C}$ ), 142.54 (C), 140.33 (C), 137.11 (CH), 133.43 (C), 131.98 (CH), 128.74 (CH), 128.37 (CH), 120.47 (CH), 106.05 ( $2 \times \text{CH}$ ), 60.95 ( $2 \times \text{CH}_3$ ), 56.41 ( $\text{CH}_3$ ) (Figure S29).

HRMS (ESI) Exact mass calcd for  $\text{C}_{16}\text{H}_{16}\text{NaO}_4\text{S}$   $[\text{M}+\text{Na}]^+$ : 327.0662, found 327.0647.

**(E)-1-(2-Hydroxy-4-methoxyphenyl)-3-(thiophen-2-yl)prop-2-en-1-one (18c)**

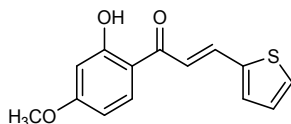

The title compound was prepared according to General Procedure A from 2'-hydroxy-4'-methoxyacetophenone and thiophene-2-carbaldehyde for a reaction time of 24 h and purified by recrystallization (MeOH) to afford a light green solid (196.1 mg, 75.3%).

m.p. 83-84  $^{\circ}\text{C}$  (MeOH);

$R_f = 0.19$  (10% EtOAc/hexane);

IR (film) 2936, 1625, 1566 (C=O), 1504, 1371, 1273, 1238, 1215, 1128, 1018  $\text{cm}^{-1}$ ;  
 $^1\text{H}$  NMR (500 MHz,  $\text{CDCl}_3$ )  $\delta$  13.47 (1H, s, OH), 8.01 (1H, d,  $J = 15.1$  Hz, CH=CH), 7.78 (1H, d,  $J = 8.9$  Hz, CH=CH), 7.44 (1H, d,  $J = 5.0$  Hz, ArH), 7.39-7.32 (2H, m, ArH), 7.10 (1H, dd,  $J = 4.8, 3.8$  Hz, ArH), 6.51-6.46 (2H, m, ArH), 3.86 (3H, s,  $\text{CH}_3$ );  
 $^{13}\text{C}$  NMR (125.8 MHz,  $\text{CDCl}_3$ )  $\delta$  191.22 (C=O), 166.60 (C), 166.16 (C), 140.29 (C), 136.77 (CH), 132.18 (CH), 131.07 (CH), 129.05 (CH), 128.38 (CH), 119.06 (CH), 113.97 (C), 107.69 (CH), 101.03 (CH), 55.53 ( $\text{CH}_3$ ) (Figure S30).  
 HRMS (ESI) Exact mass calcd for  $\text{C}_{14}\text{H}_{11}\text{O}_3\text{S}$   $[\text{M}-\text{H}]^+$ : 259.0434, found 259.0437.

**(E)-1-(4-(Dimethylamino)phenyl)-3-(thiophen-2-yl)prop-2-en-1-one (18d)**

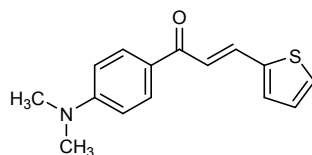

The title compound was prepared according to General Procedure A from 4'-(*N,N*-dimethylamino)acetophenone and thiophene-2-carbaldehyde for a reaction time of 48 h and purified by recrystallization (MeOH) to afford a yellow solid (174.3 mg, 48%).

m.p. 184-185  $^{\circ}\text{C}$  (MeOH);

$R_f = 0.58$  (310% EtOAc/hexane);

IR (film) 3075, 1608, 1560 (C=O), 1543, 1535, 1340, 1188, 978, 815, 732  $\text{cm}^{-1}$ ;

$^1\text{H}$  NMR (500 MHz,  $\text{CDCl}_3$ )  $\delta$  8.02-7.96 (2H, m, ArH), 7.92 (1H, d,  $J = 15.2$  Hz, CH=CH), 7.40 (1H, d,  $J = 15.2$  Hz, CH=CH), 7.37 (1H, d,  $J = 5.1$  Hz, ArH), 7.32 (1H, d,  $J = 3.5$  Hz, ArH), 7.07 (1H, dd,  $J = 5.0, 3.7$  Hz, ArH), 6.73-6.67 (2H, m, ArH), 3.07 (6H, s,  $2 \times \text{CH}_3$ );

$^{13}\text{C}$  NMR (125.8 MHz,  $\text{CDCl}_3$ )  $\delta$  187.08 (C=O), 153.36 (C), 140.98 (C), 134.95 (CH), 130.98 (CH), 130.68 ( $2 \times \text{CH}$ ), 128.11 (CH), 127.72 (CH), 125.83 (C), 121.09 (CH), 110.78 ( $2 \times \text{CH}$ ), 39.97 ( $2 \times \text{CH}_3$ ) (Figure S31).

HRMS (ESI) Exact mass calcd for  $\text{C}_{15}\text{H}_{15}\text{NNaOS}$   $[\text{M}+\text{Na}]^+$ : 280.0767, found 280.0758.

**(E)-1-(1-Methyl-1H-pyrrol-2-yl)-3-(thiophen-2-yl)prop-2-en-1-one (18e)**

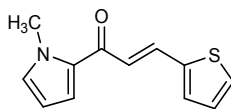

The title compound was prepared according to General Procedure A from 2-acetyl-1-methylpyrrole and thiophene-2-carbaldehyde for a reaction time of 48 h and purified by recrystallization (MeOH) to afford a light green solid (175.6 mg, 80.8%).

m.p. 84-85  $^{\circ}\text{C}$  (MeOH);

$R_f = 0.22$  (10% EtOAc/hexane);

IR (film) 3103, 2947, 1638, 1582 (C=O), 1526, 1402, 1379, 1209, 1064, 988  $\text{cm}^{-1}$ ;



$^1\text{H}$  NMR (500 MHz,  $\text{CDCl}_3$ )  $\delta$  7.85 (1H, d,  $J = 15.3$  Hz,  $\text{CH}=\text{CH}$ ), 7.36 (1H, d,  $J = 5.6$  Hz,  $\text{ArH}$ ), 7.30 (1H, d,  $J = 3.6$  Hz,  $\text{ArH}$ ), 7.21 (1H, d,  $J = 15.3$  Hz,  $\text{CH}=\text{CH}$ ), 7.09 (1H, dd,  $J = 4.1$  Hz,  $\text{ArH}$ ), 7.07 (1H, dd,  $J = 4.1, 3.6$  Hz,  $\text{ArH}$ ), 6.86-6.88 (1H, m,  $\text{ArH}$ ), 6.20 (1H, dd,  $J = 4.1, 2.5$  Hz,  $\text{ArH}$ ), 4.03 (3H, s,  $\text{CH}_3$ );

$^{13}\text{C}$  NMR (125.8 MHz,  $\text{CDCl}_3$ )  $\delta$  179.20 (C=O), 140.65 (C), 133.85 (CH), 131.86 (C), 131.60 (CH), 130.85 (CH), 128.07 (CH), 127.71 (CH), 122.63 (CH), 119.12 (CH), 108.22 (CH), 37.69 ( $\text{CH}_3$ ) (Figure S32).

HRMS (ESI) Exact mass calcd for  $\text{C}_{12}\text{H}_{11}\text{NNaOS}$   $[\text{M}+\text{Na}]^+$ : 240.0454, found 240.0464.

**(E)-1,3-Di(thiophen-2-yl)prop-2-en-1-one (18f)**

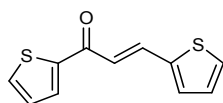

The title compound was prepared according to General Procedure A from 2-acetylthiophene and thiophene-2-carbaldehyde for a reaction time of 24 h and purified by recrystallization (MeOH) to afford a pale yellow solid (170.7 mg, 77.5%).

m.p. 93-94 °C (MeOH);

$R_f = 0.34$  (10% EtOAc/hexane);

IR (film) 3101, 1638, 1578 (C=O), 1518, 1410, 1281, 1240, 1213, 968, 706  $\text{cm}^{-1}$ ;

$^1\text{H}$  NMR (500 MHz,  $\text{CDCl}_3$ )  $\delta$  7.96 (1H, d,  $J = 15.2$  Hz,  $\text{CH}=\text{CH}$ ), 7.84 (1H, dd,  $J = 3.8, 1.1$  Hz,  $\text{ArH}$ ), 7.67 (1H, dd,  $J = 4.9, 1.1$  Hz,  $\text{ArH}$ ), 7.42 (1H, d,  $J = 5.1$  Hz,  $\text{ArH}$ ), 7.36 (1H, d,  $J = 3.6$  Hz,  $\text{ArH}$ ), 7.21 (1H, d,  $J = 15.2$  Hz,  $\text{CH}=\text{CH}$ ), 7.17 (1H, dd,  $J = 4.9, 3.8$  Hz,  $\text{ArH}$ ), 7.09 (1H, dd,  $J = 5.1, 3.6$  Hz,  $\text{ArH}$ );

$^{13}\text{C}$  NMR (125.8 MHz,  $\text{CDCl}_3$ )  $\delta$  181.48 (C=O), 145.43 (C), 140.06 (C), 136.35 (CH), 133.75 (CH), 132.06 (CH), 131.61 (CH), 128.81 (CH), 128.31 (CH), 128.17 (CH), 120.35 (CH) (Figure S33).

HRMS (ESI) Exact mass calcd for  $\text{C}_{11}\text{H}_8\text{NaOS}$   $[\text{M}+\text{Na}]^+$ : 242.9909, found 242.9915.

3.  $^1\text{H}$  NMR and  $^{13}\text{C}$  NMR spectra for new compounds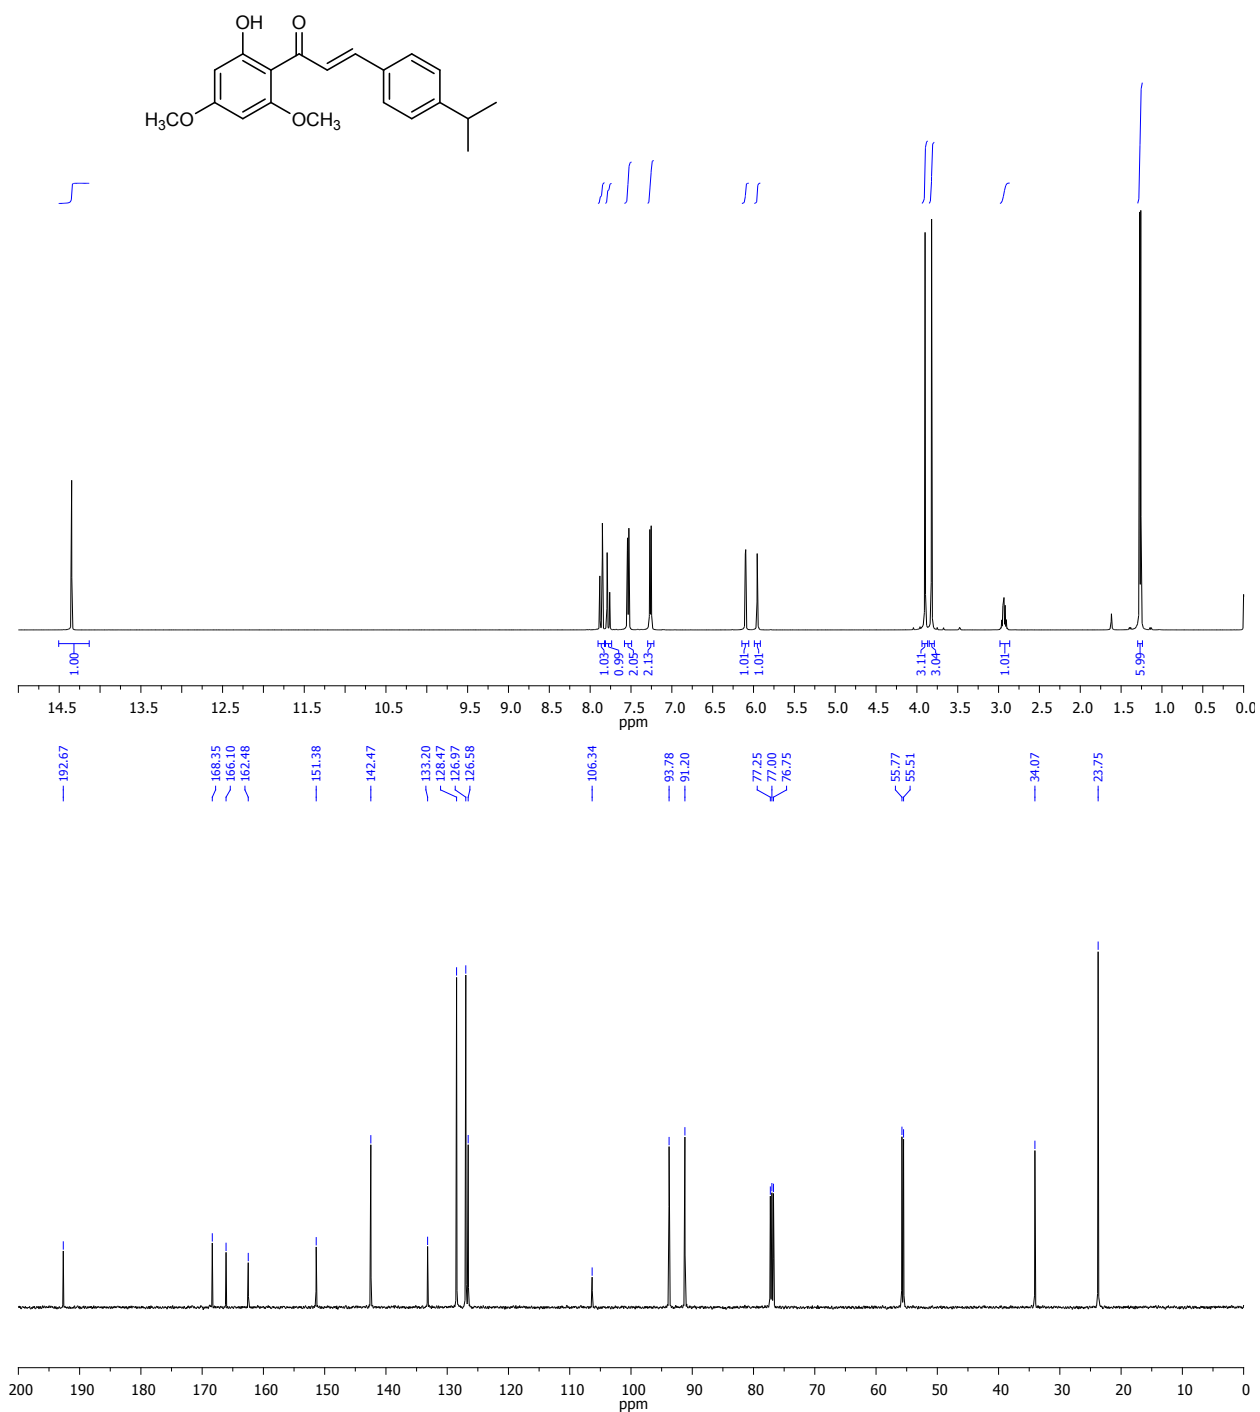Figure S1.  $^1\text{H}$  NMR and  $^{13}\text{C}$  NMR spectra of compound 2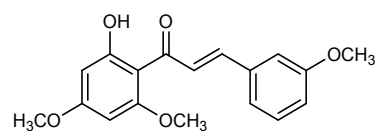

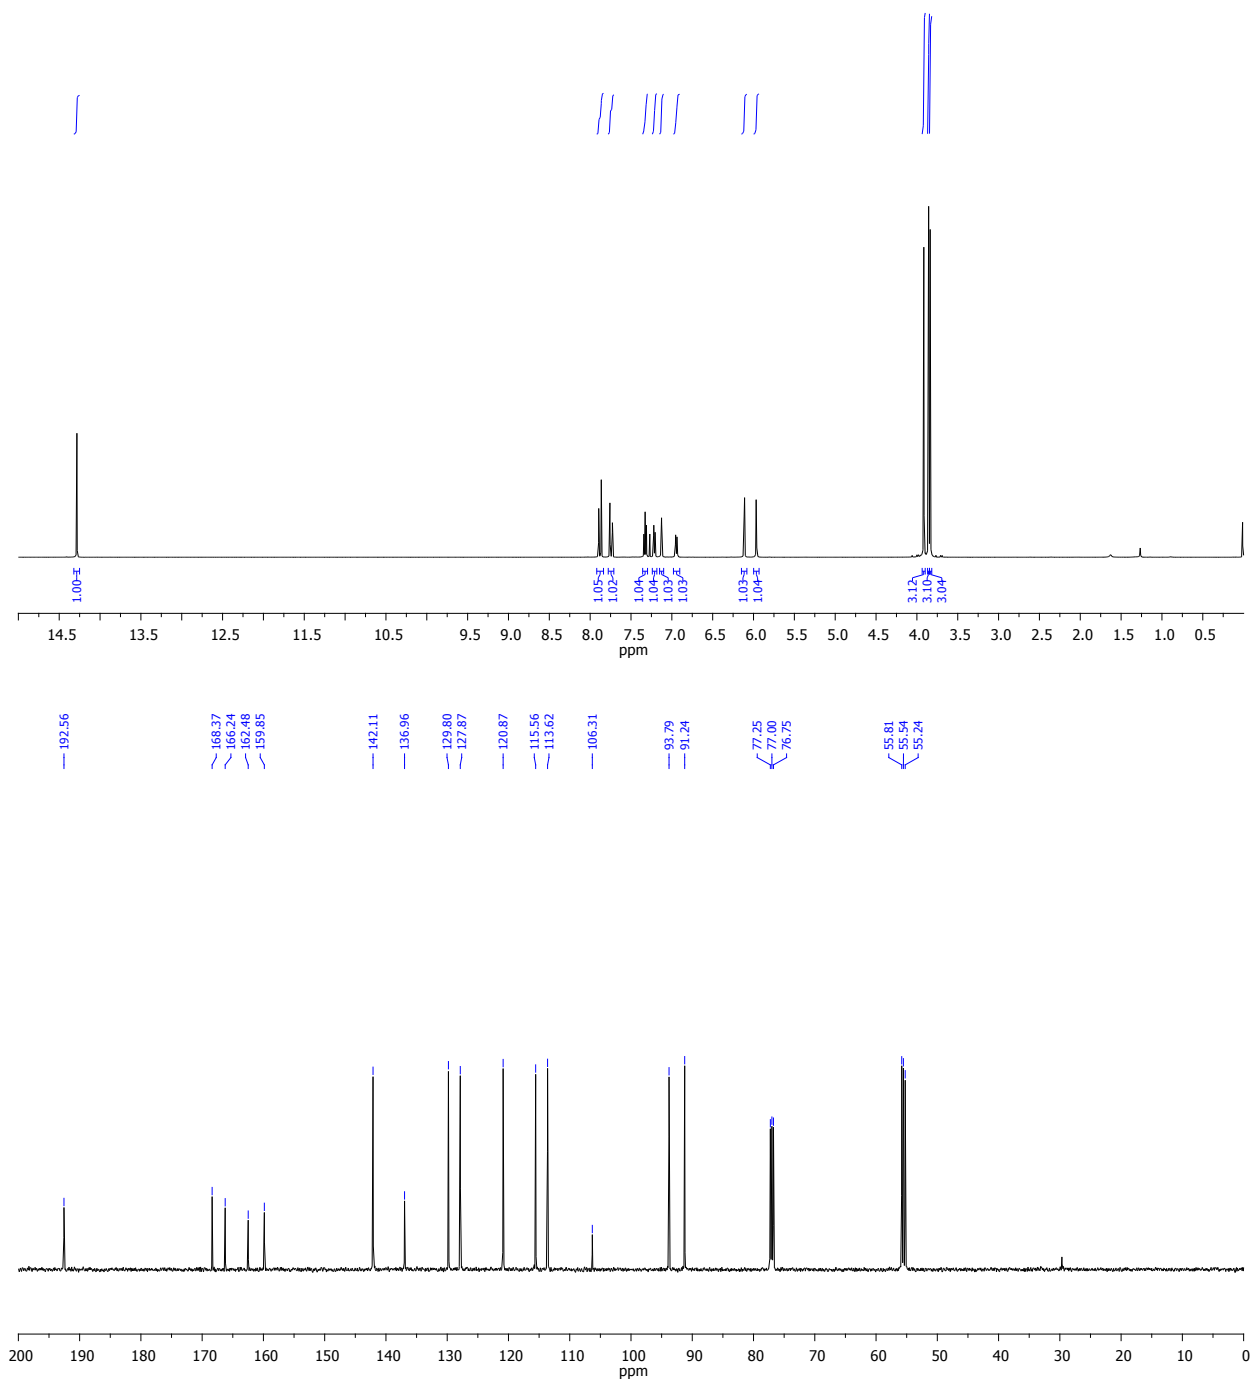

**Figure S2.**  $^1\text{H}$  NMR and  $^{13}\text{C}$  NMR spectra of compound **3**

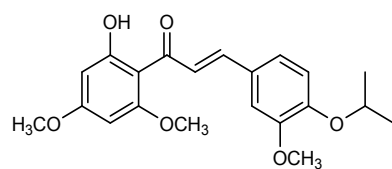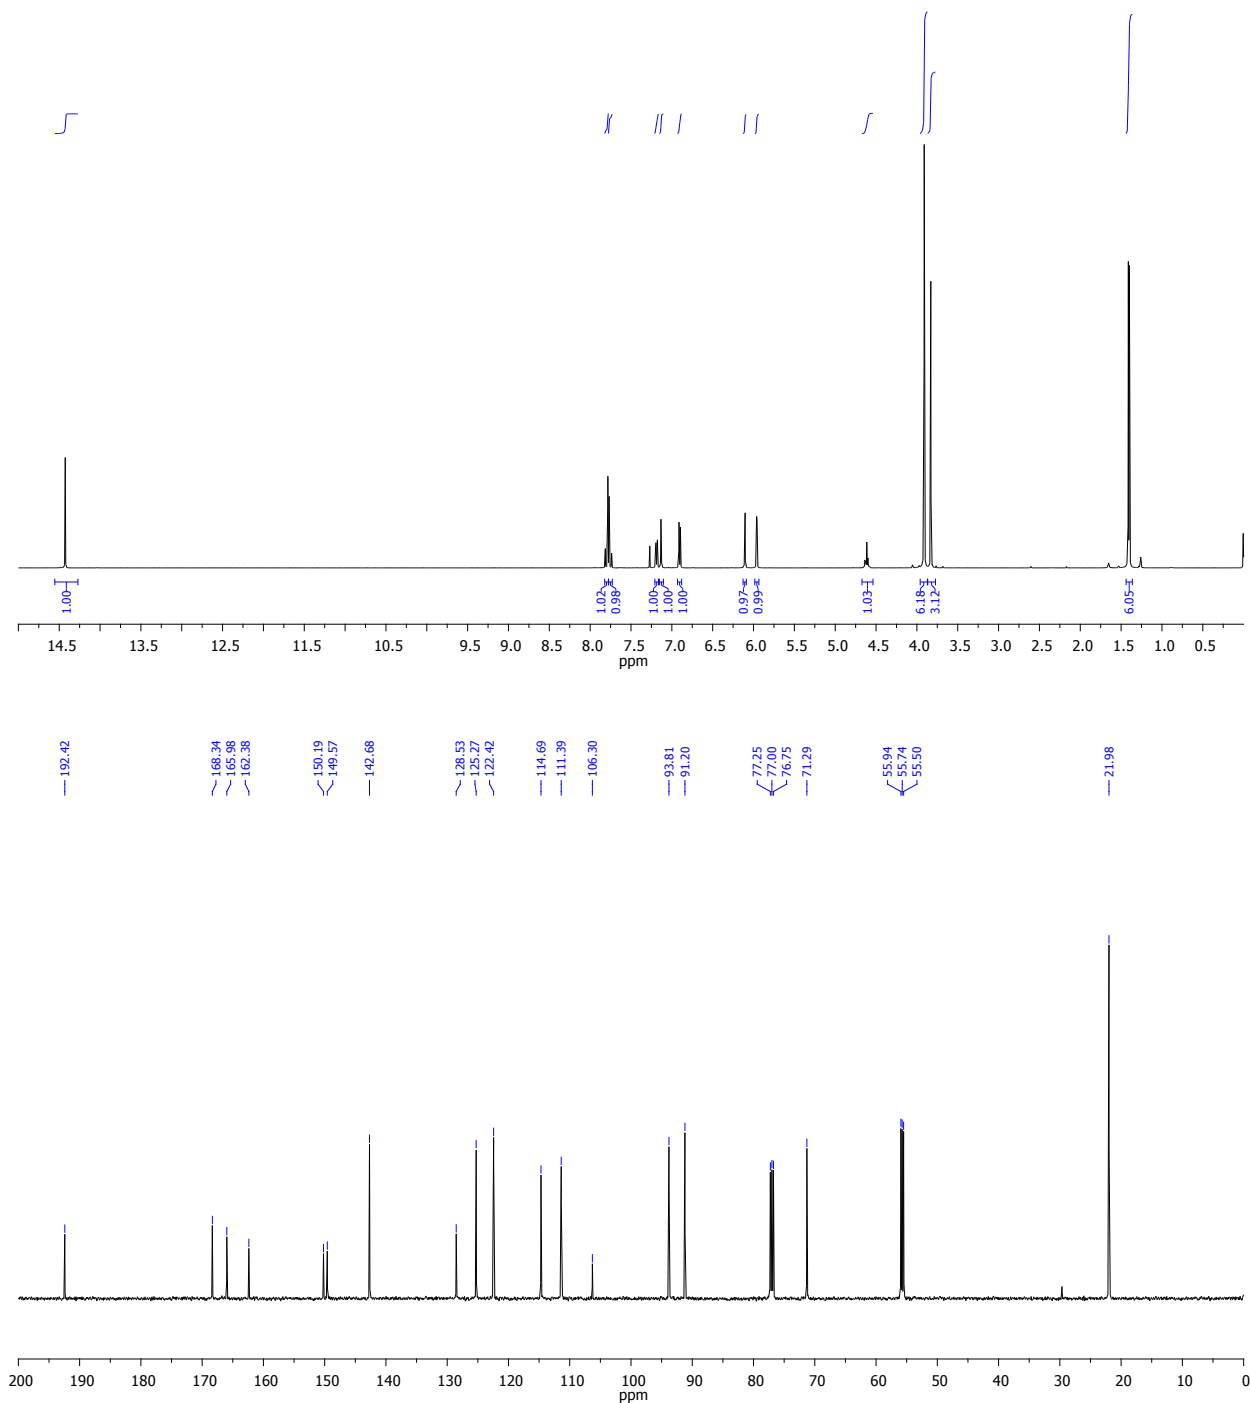

Figure S3. <sup>1</sup>H NMR and <sup>13</sup>C NMR spectra of compound 5

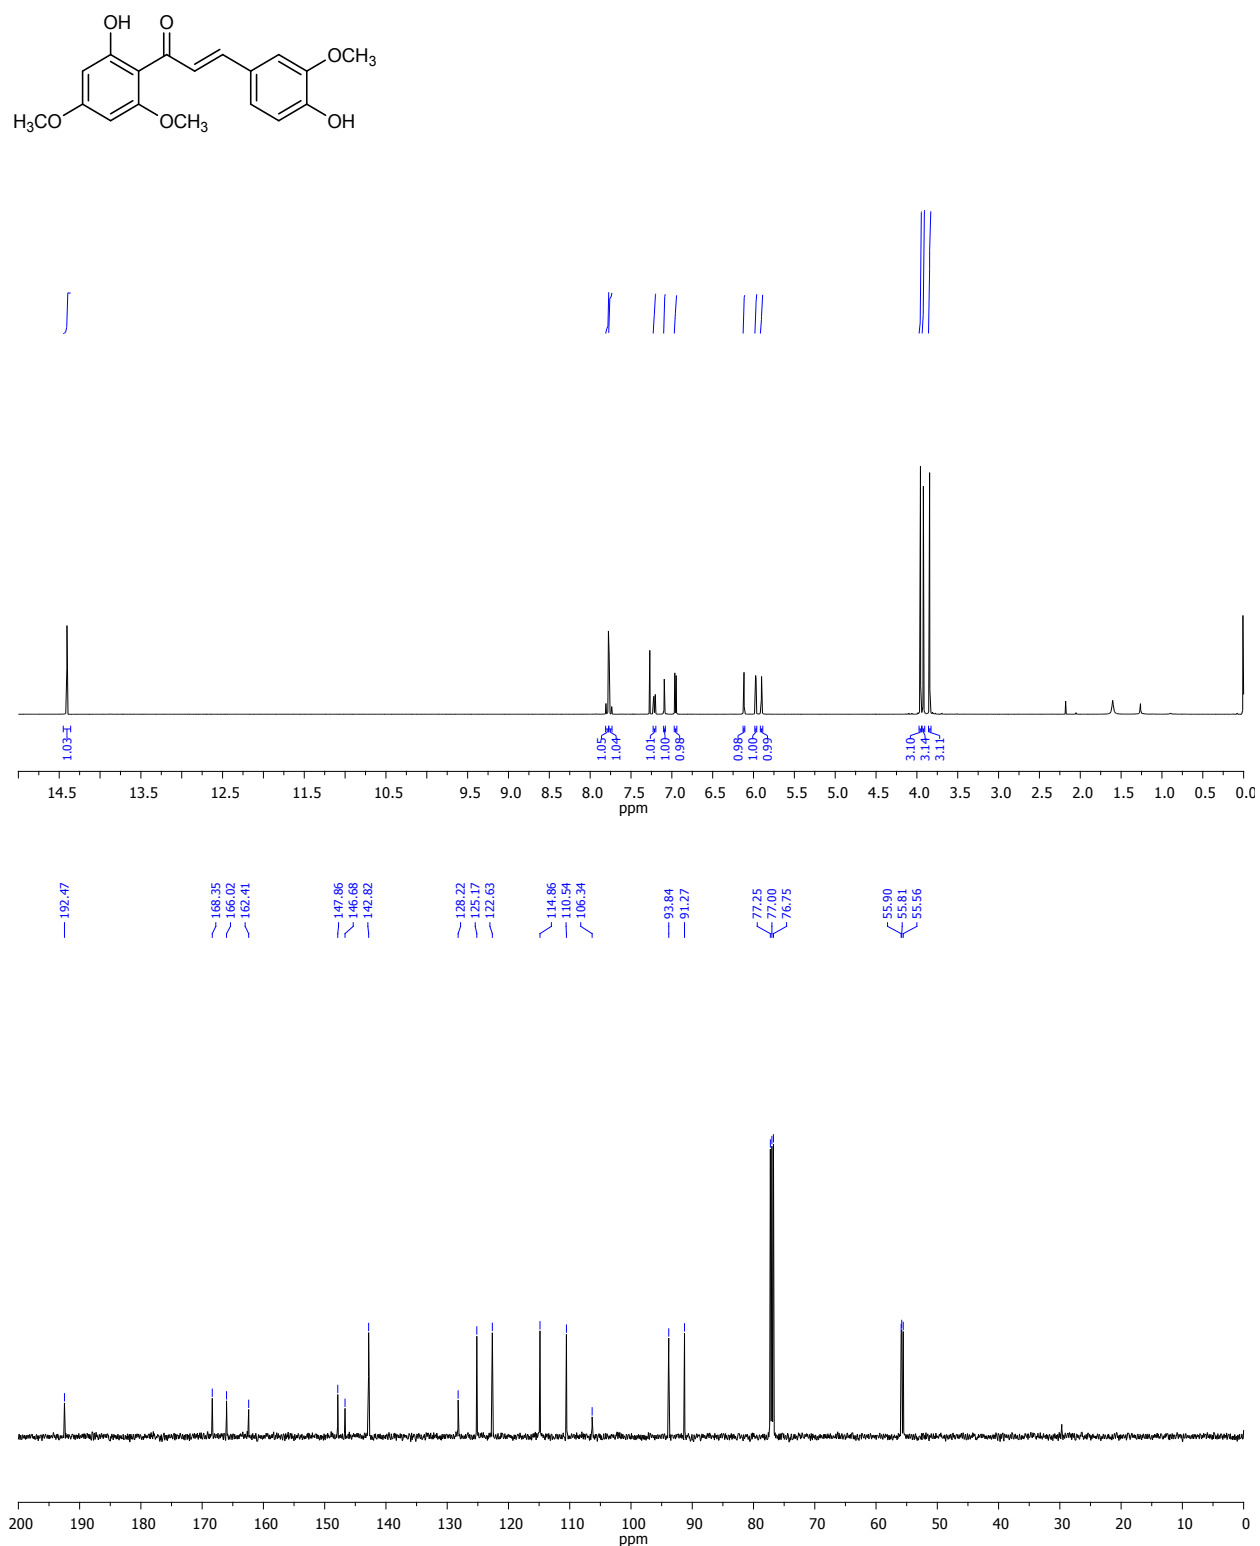

Figure S4.  $^1\text{H}$  NMR and  $^{13}\text{C}$  NMR spectra of compound 7

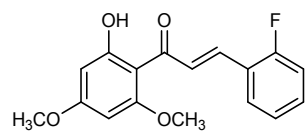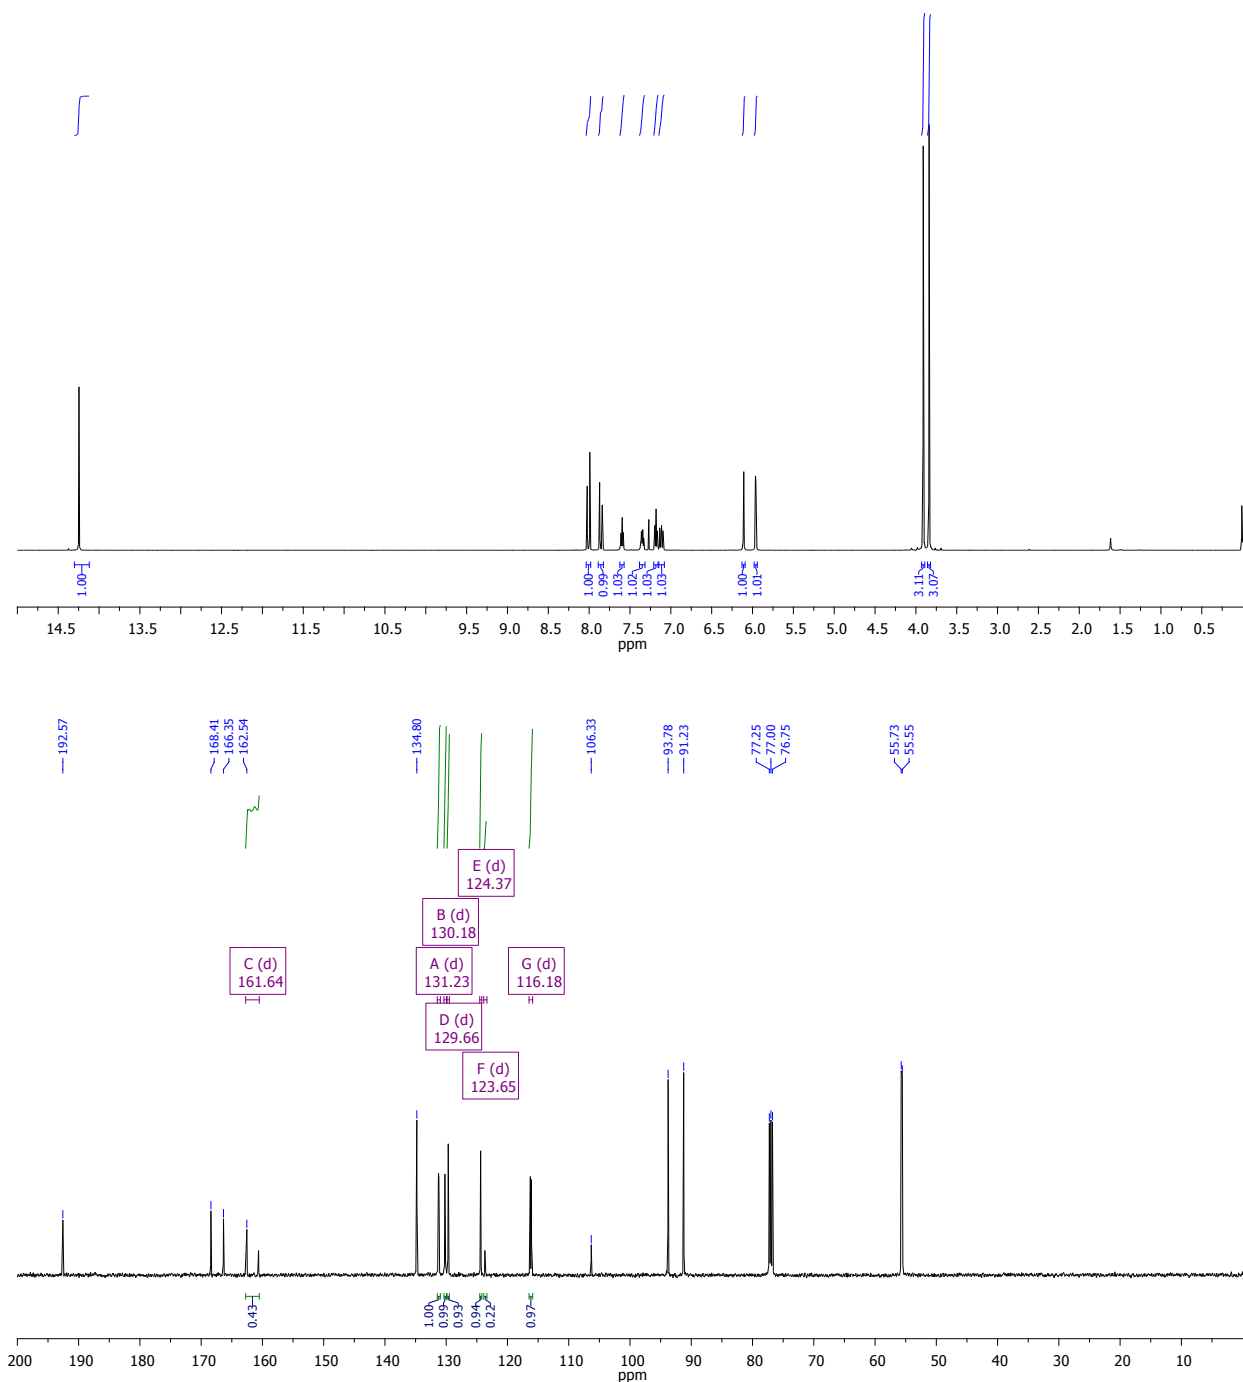

Figure S5.  $^1\text{H}$  NMR and  $^{13}\text{C}$  NMR spectra of compound 8

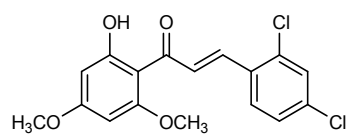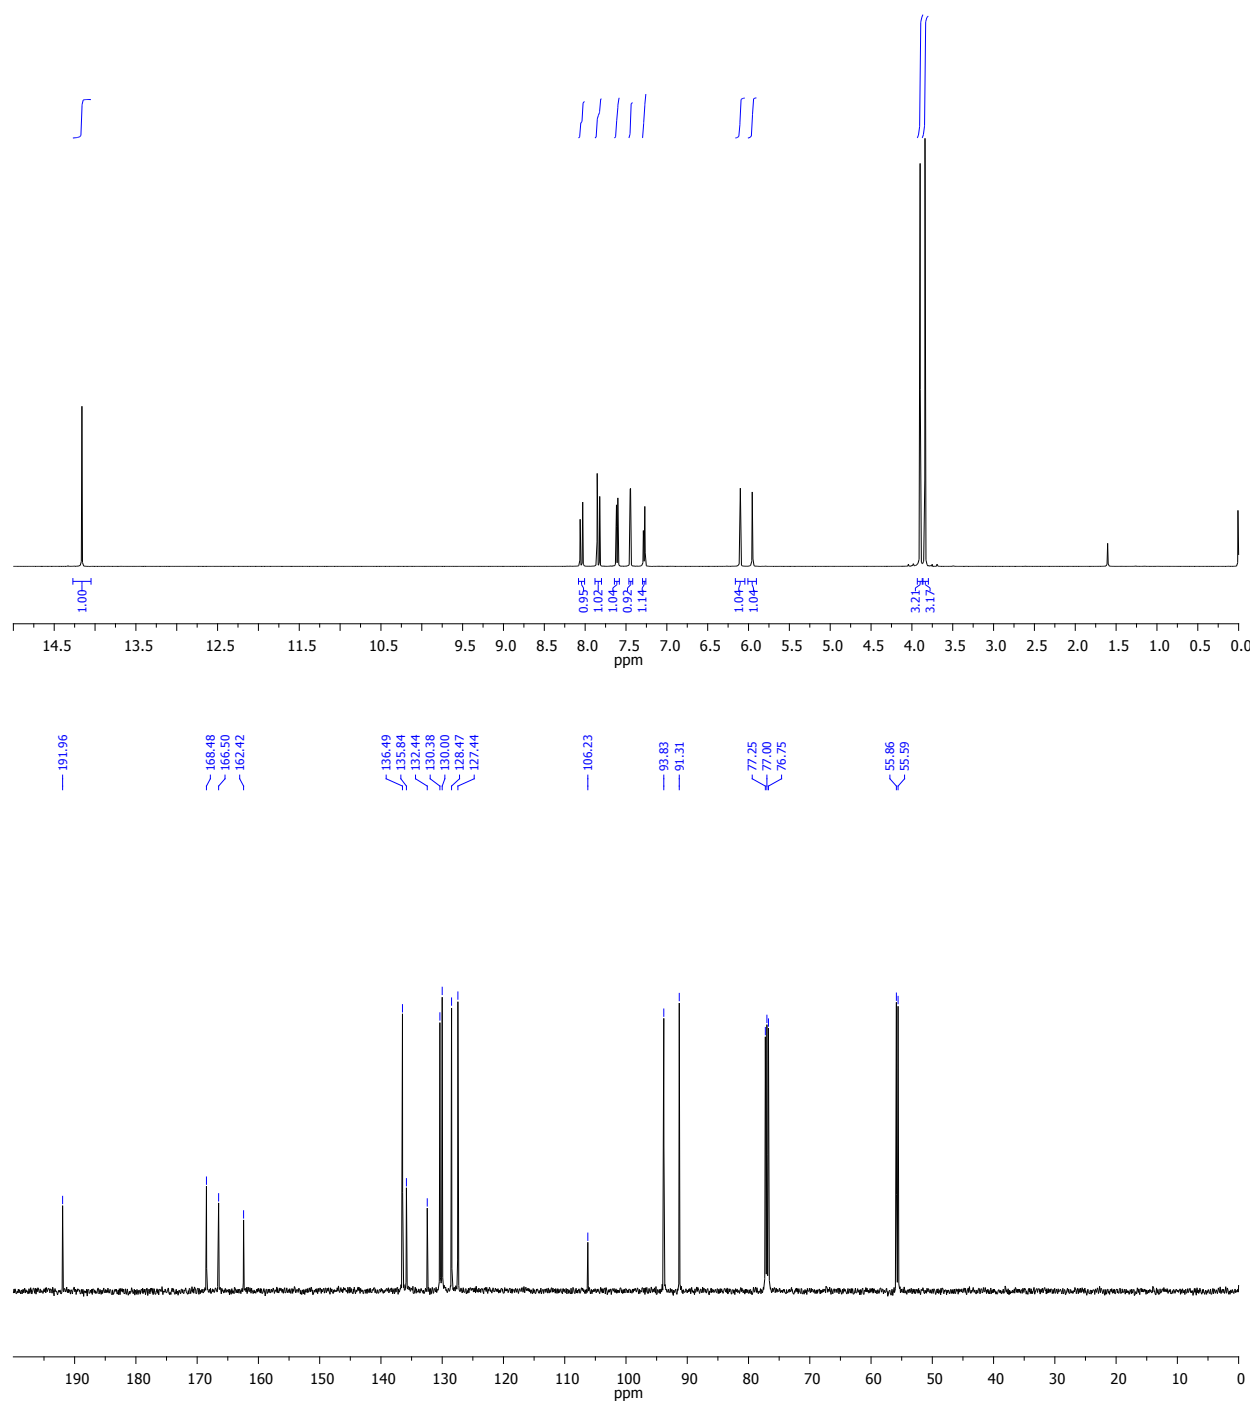

**Figure S6.** <sup>1</sup>H NMR and <sup>13</sup>C NMR spectra of compound **9**

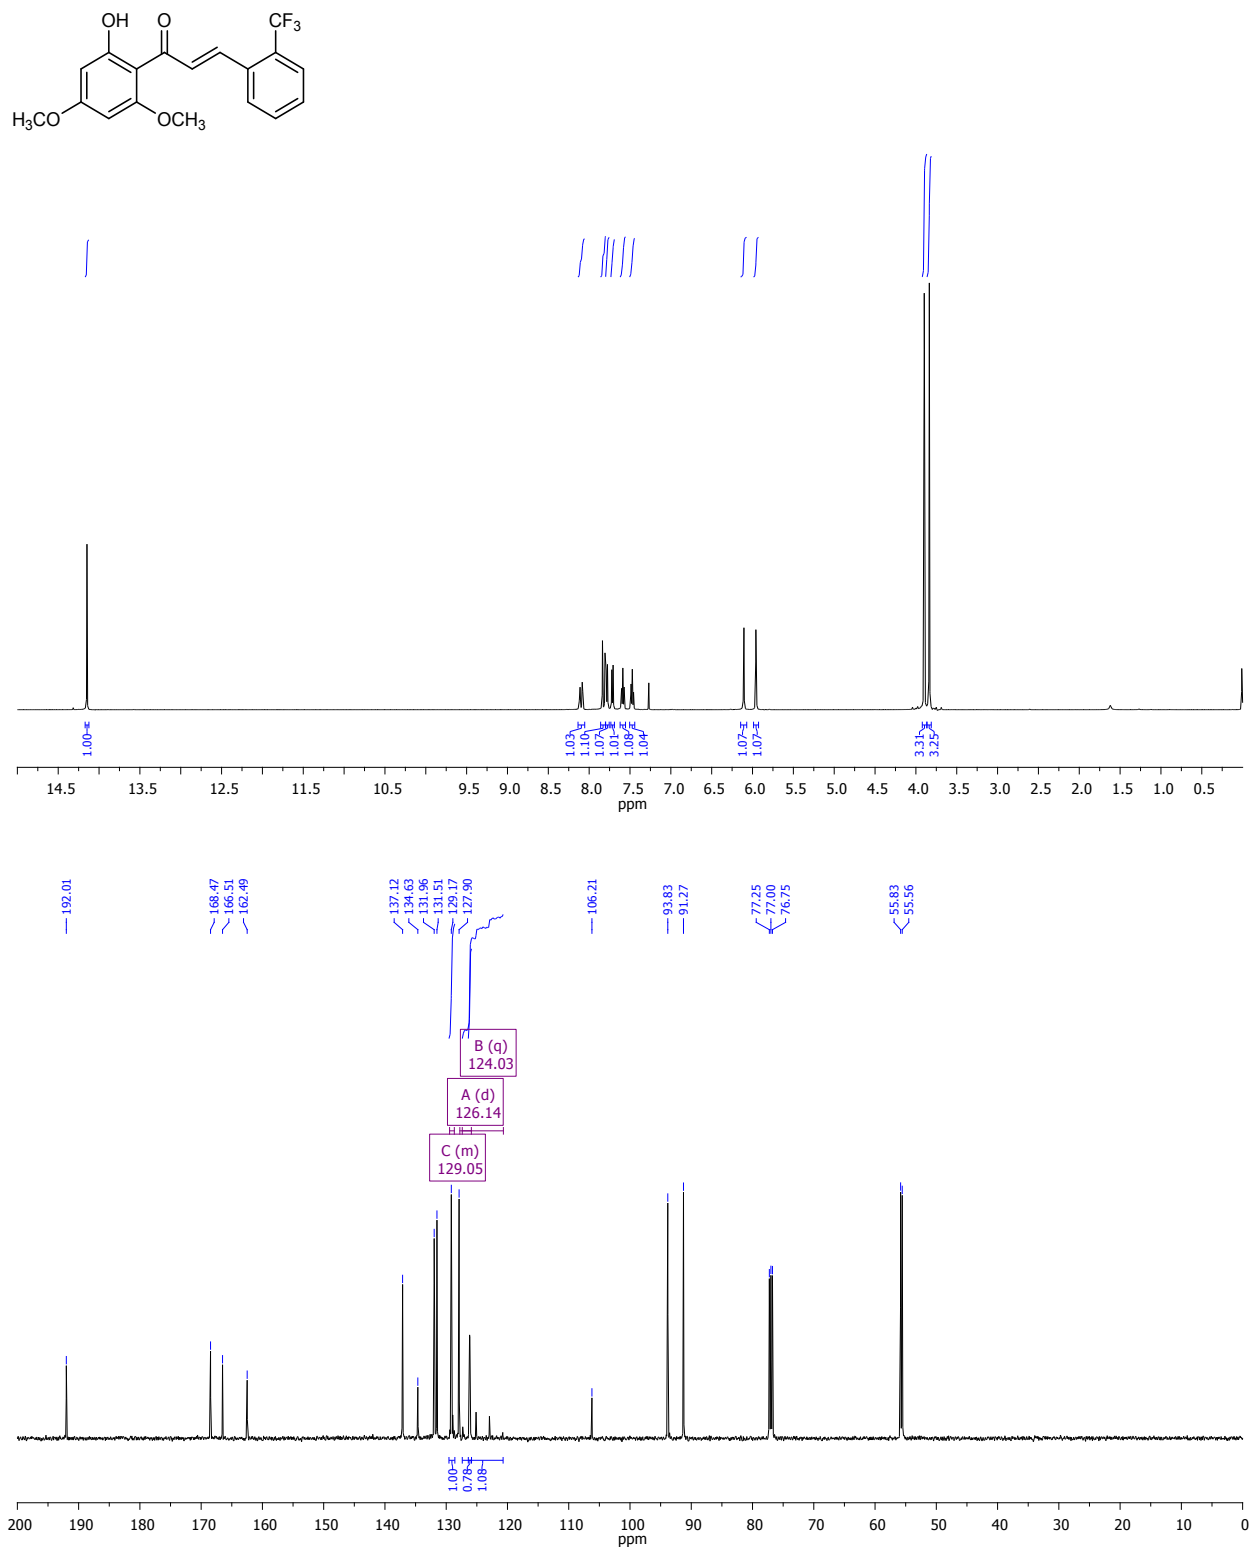

Figure S7. <sup>1</sup>H NMR and <sup>13</sup>C NMR spectra of compound 11



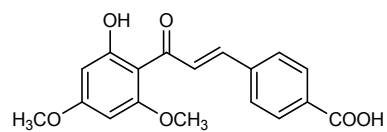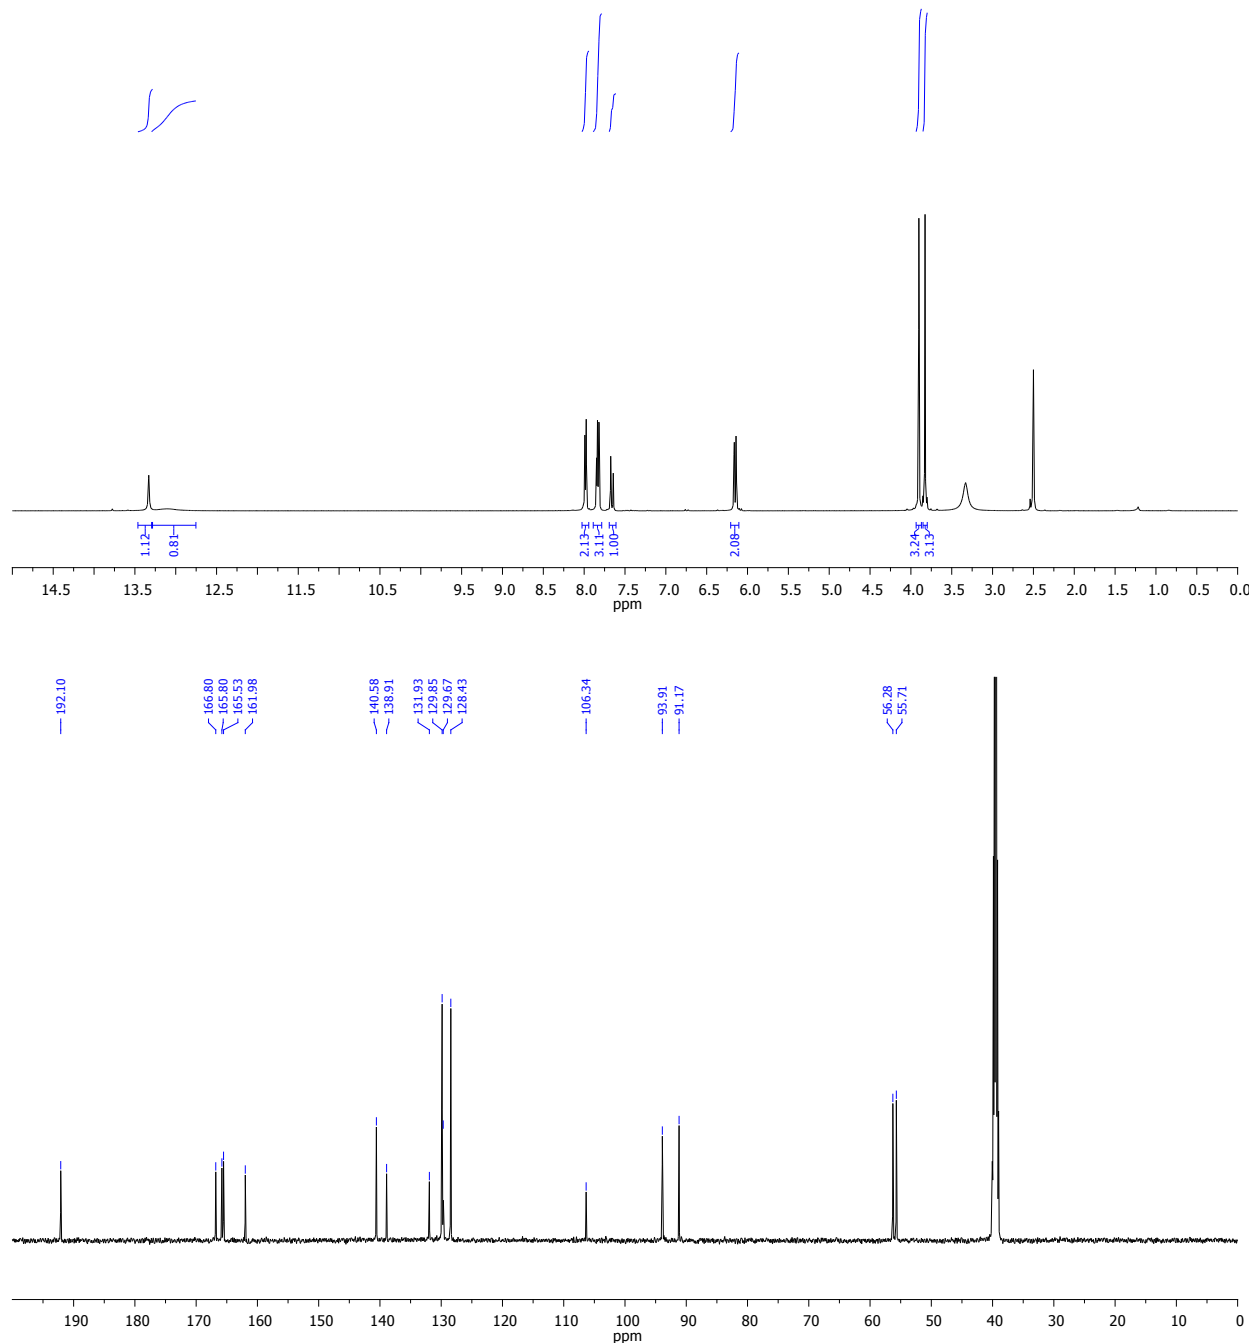

Figure S8.  $^1\text{H}$  NMR and  $^{13}\text{C}$  NMR spectra of compound 13

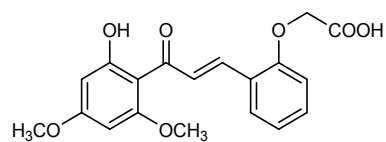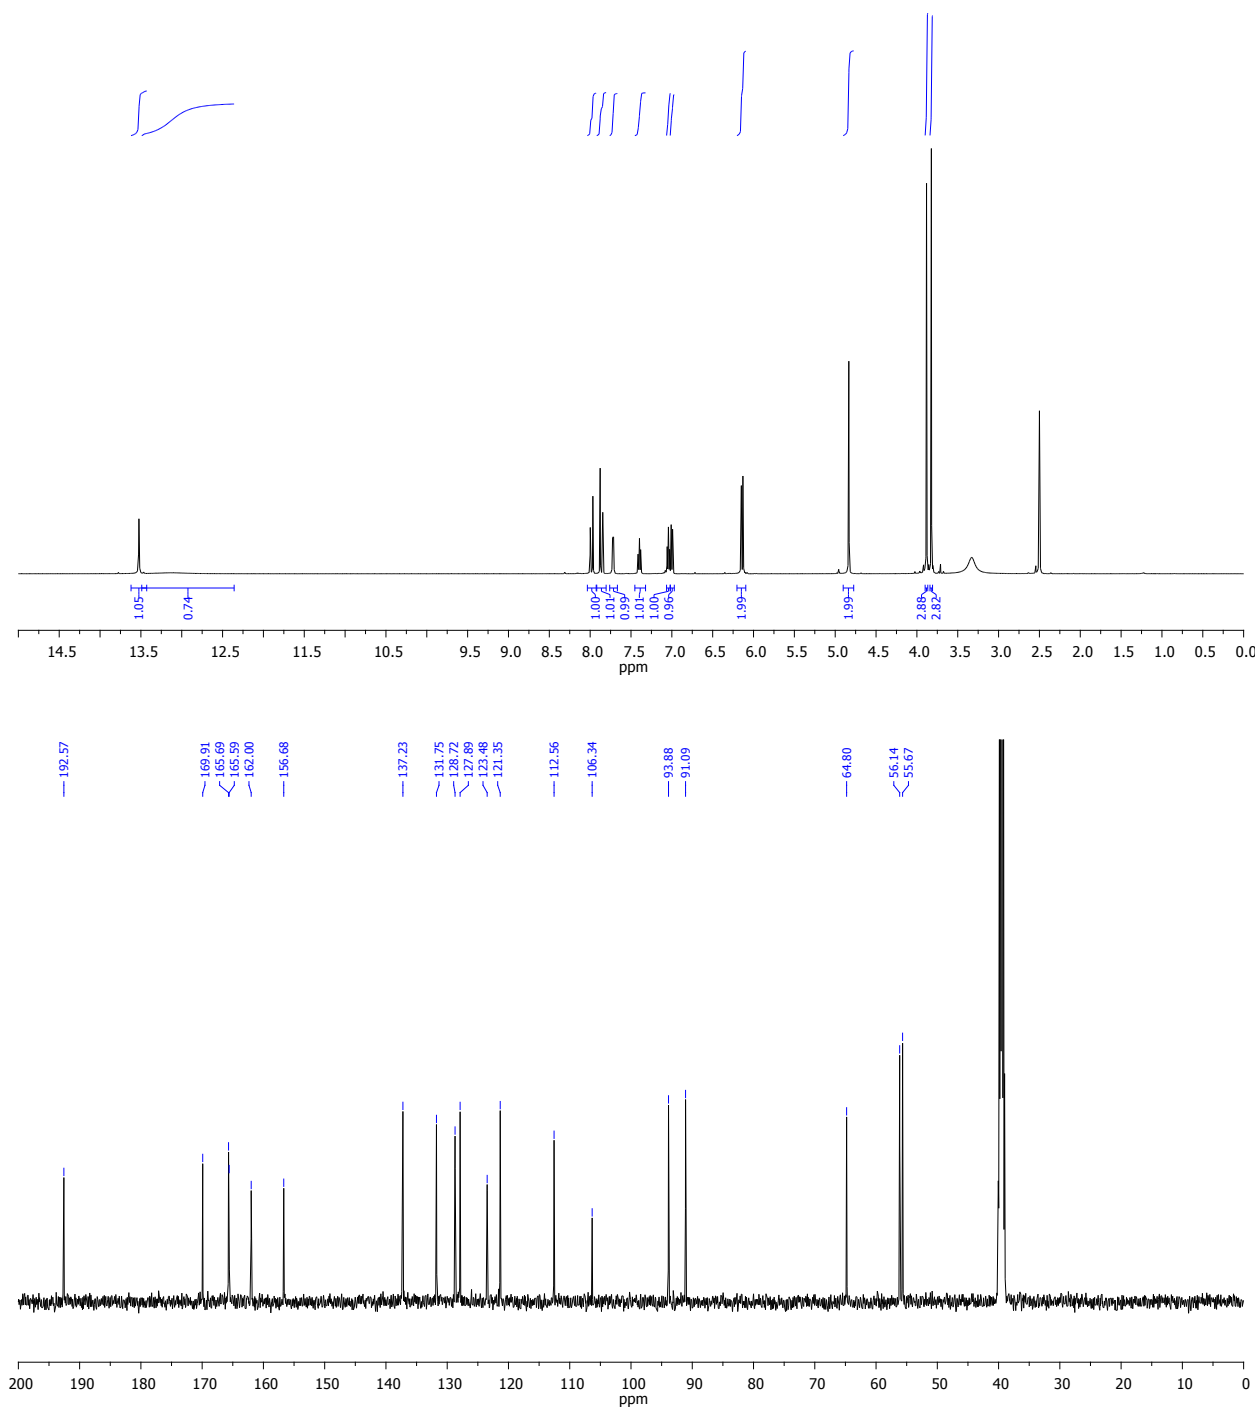

Figure S9. <sup>1</sup>H NMR and <sup>13</sup>C NMR spectra of compound 14

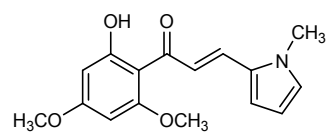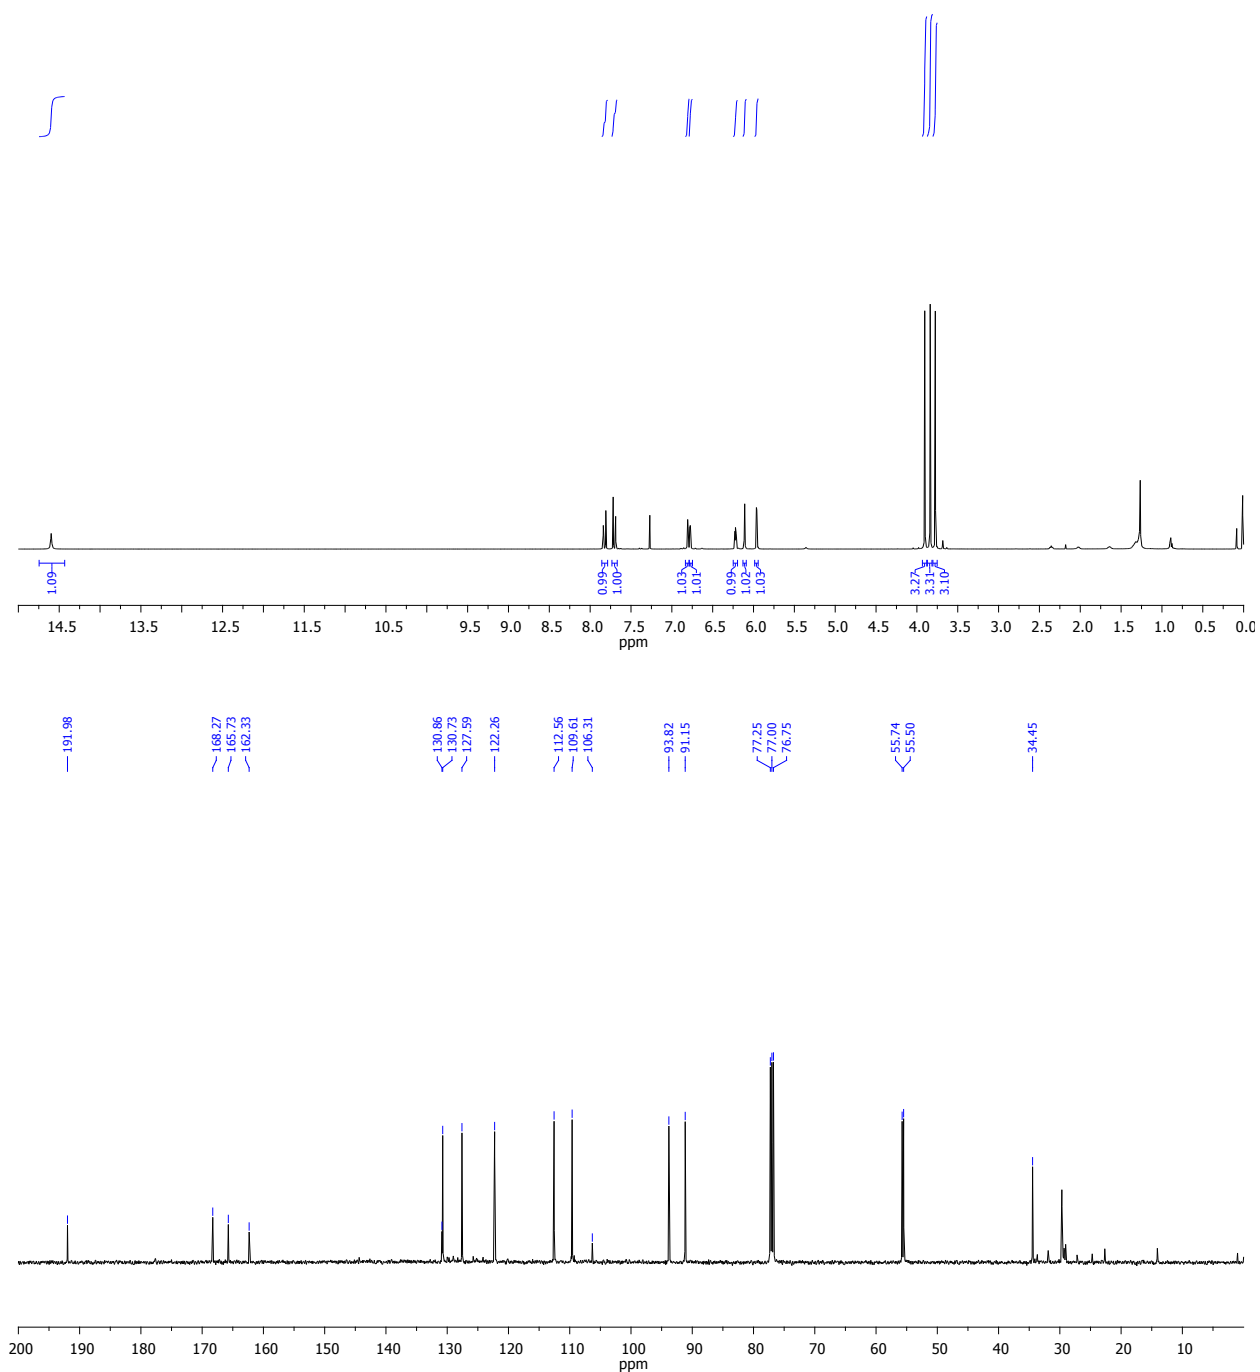

**Figure S10.** <sup>1</sup>H NMR and <sup>13</sup>C NMR spectra of compound 17

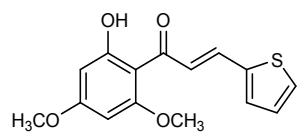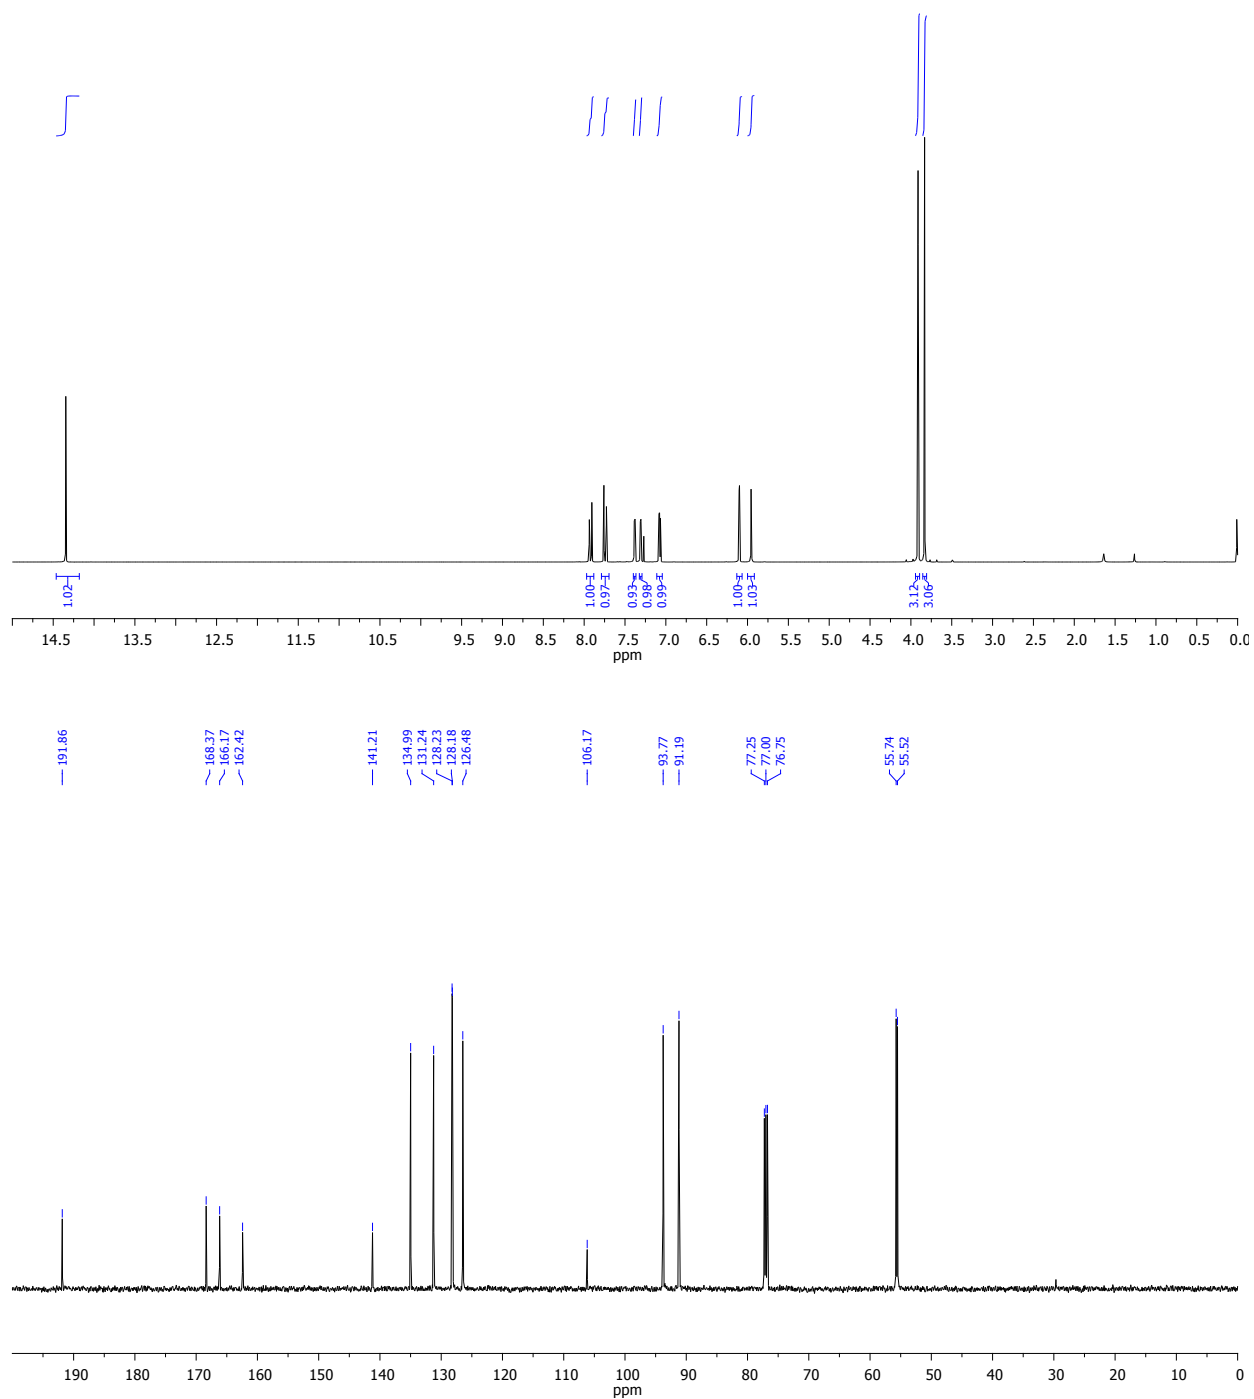

Figure S11. <sup>1</sup>H NMR and <sup>13</sup>C NMR spectra of compound 18

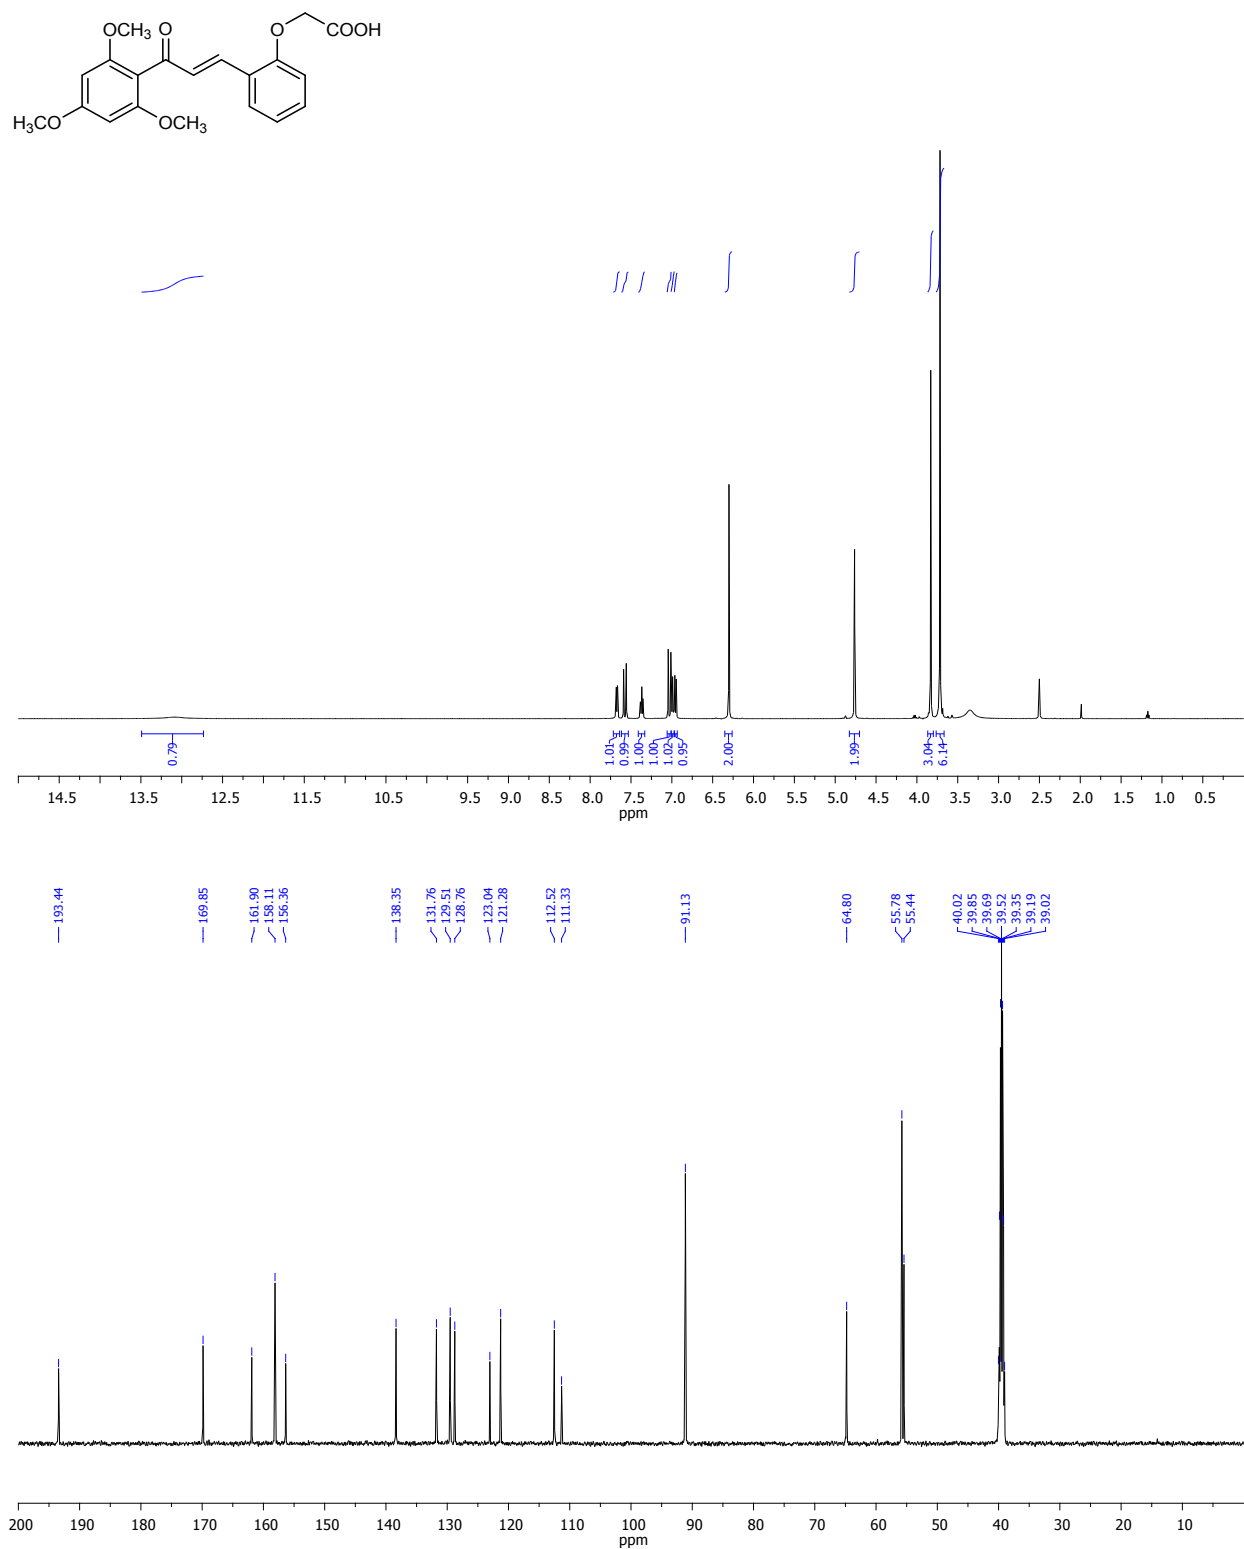

Figure S12.  $^1\text{H}$  NMR and  $^{13}\text{C}$  NMR spectra of compound 14a

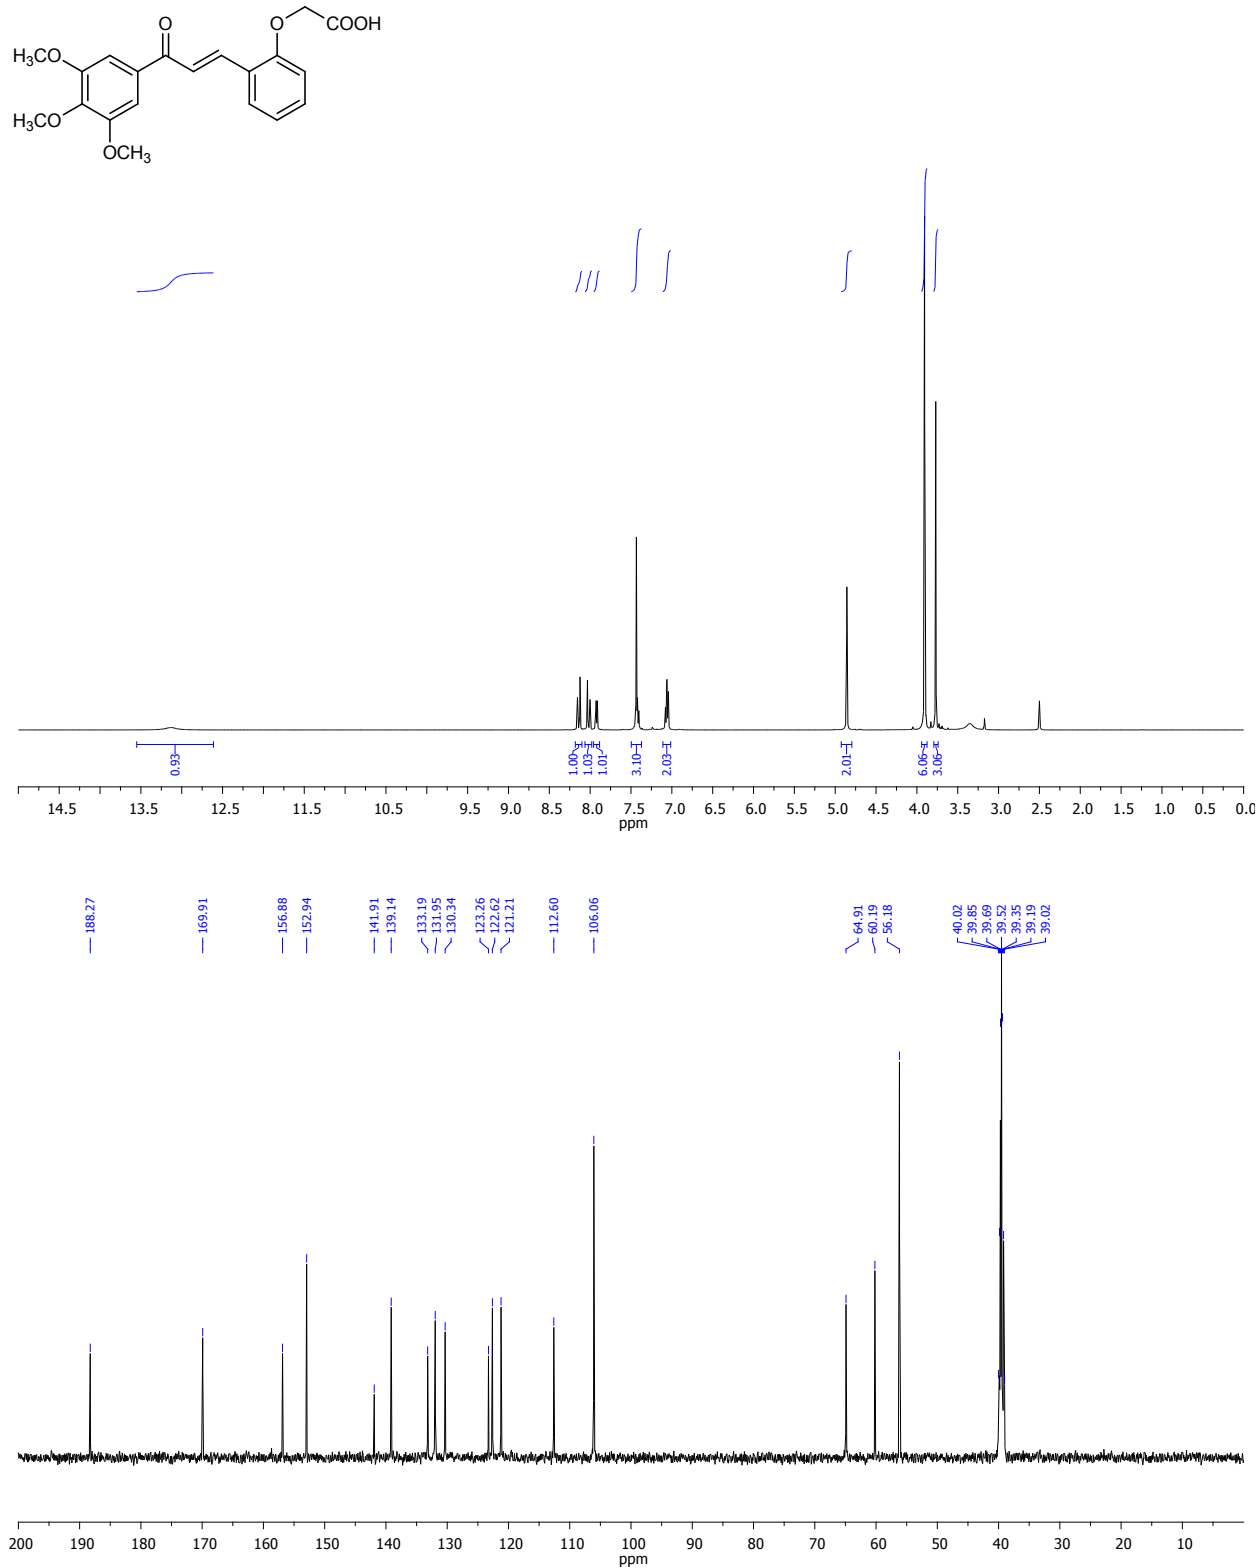

**Figure S13.**  $^1\text{H}$  NMR and  $^{13}\text{C}$  NMR spectra of compound **14b**

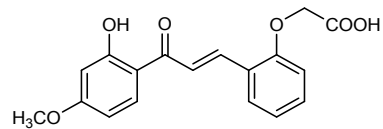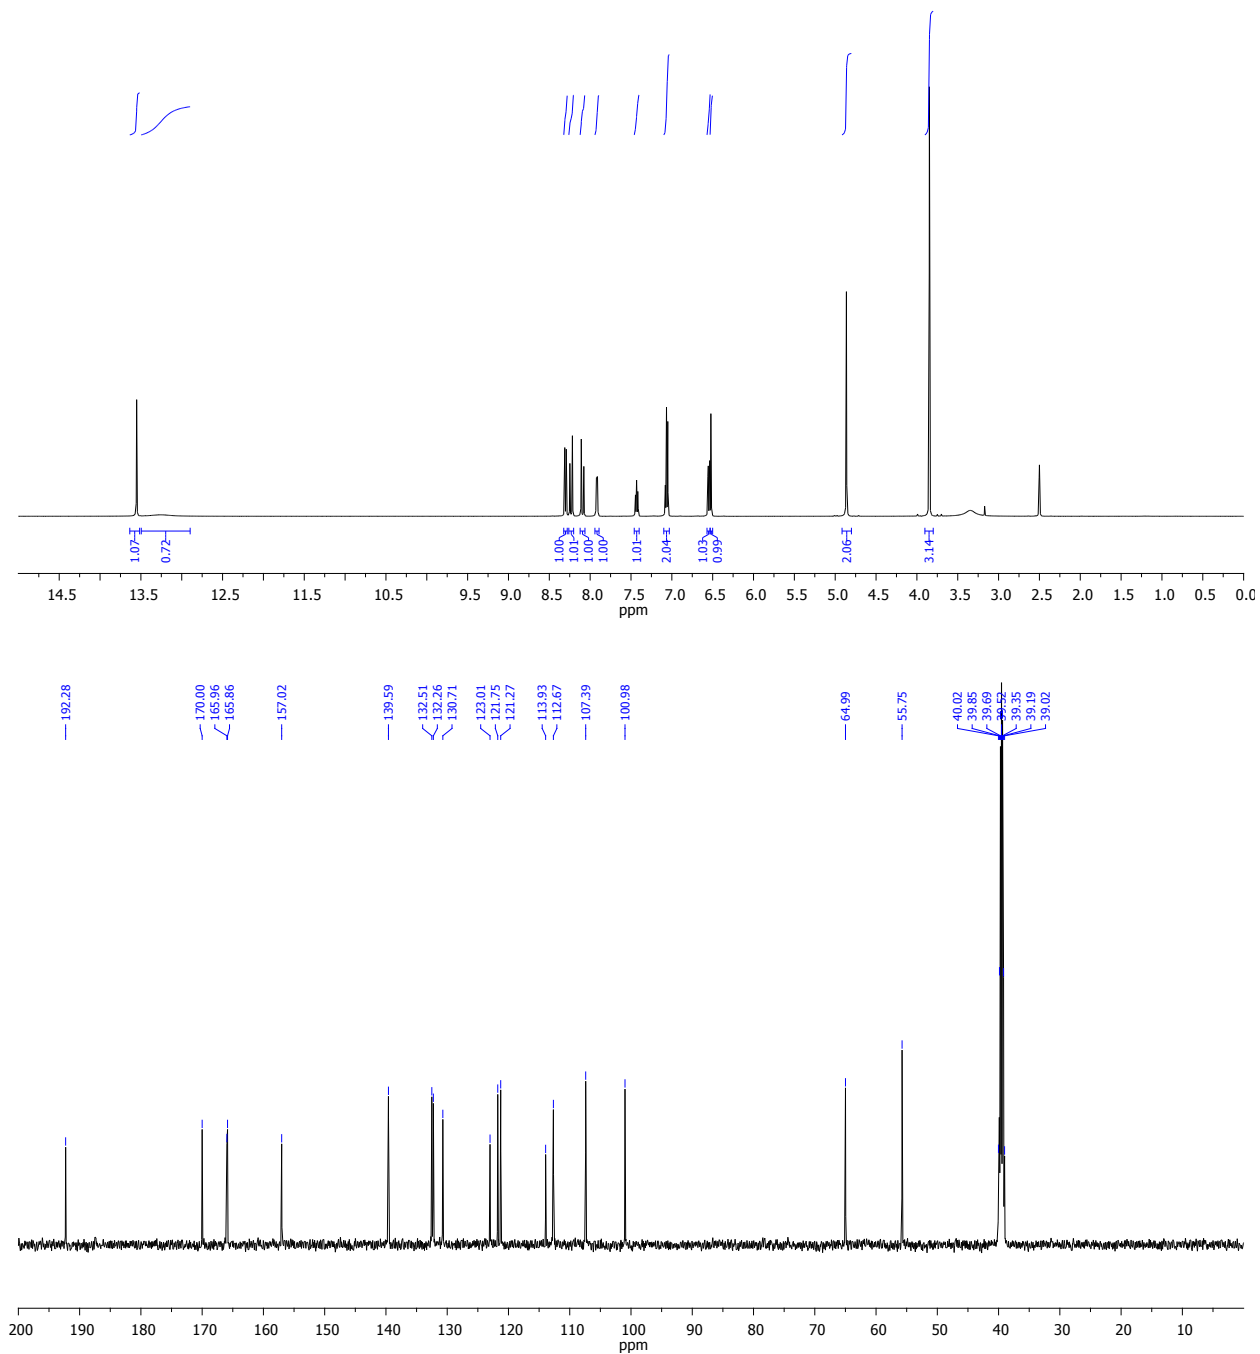

Figure S14.  $^1\text{H}$  NMR and  $^{13}\text{C}$  NMR spectra of compound 14c

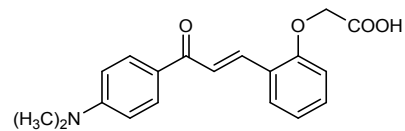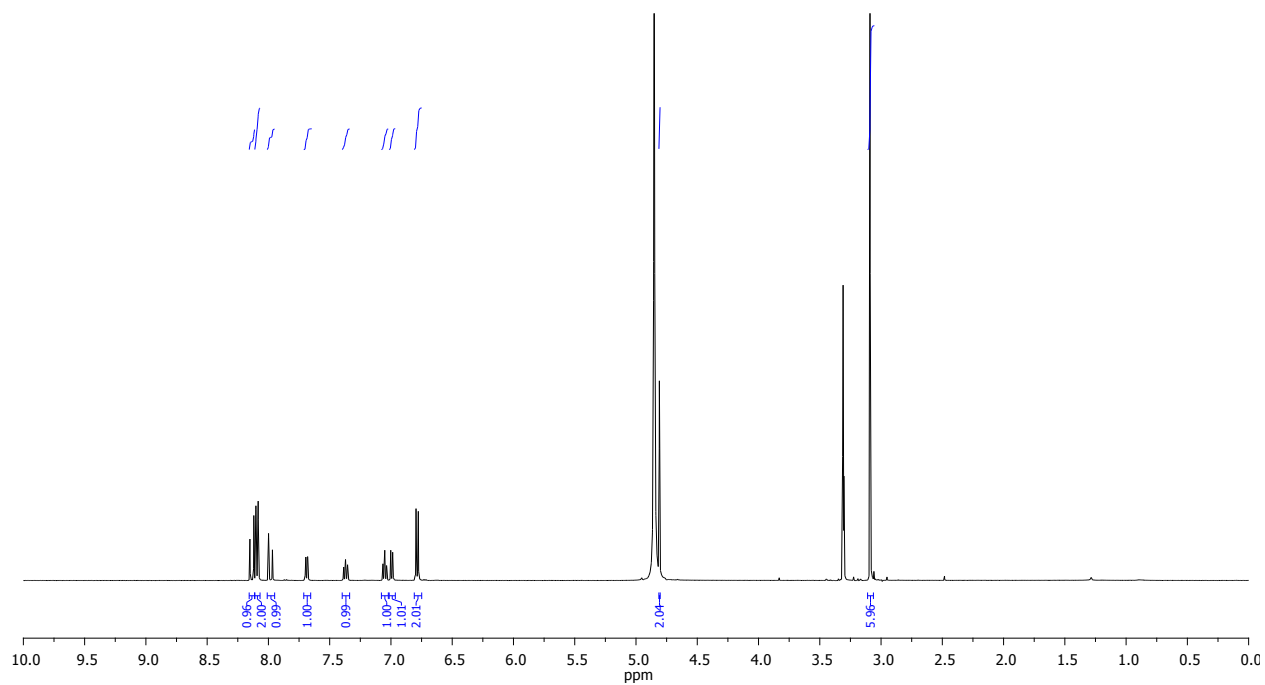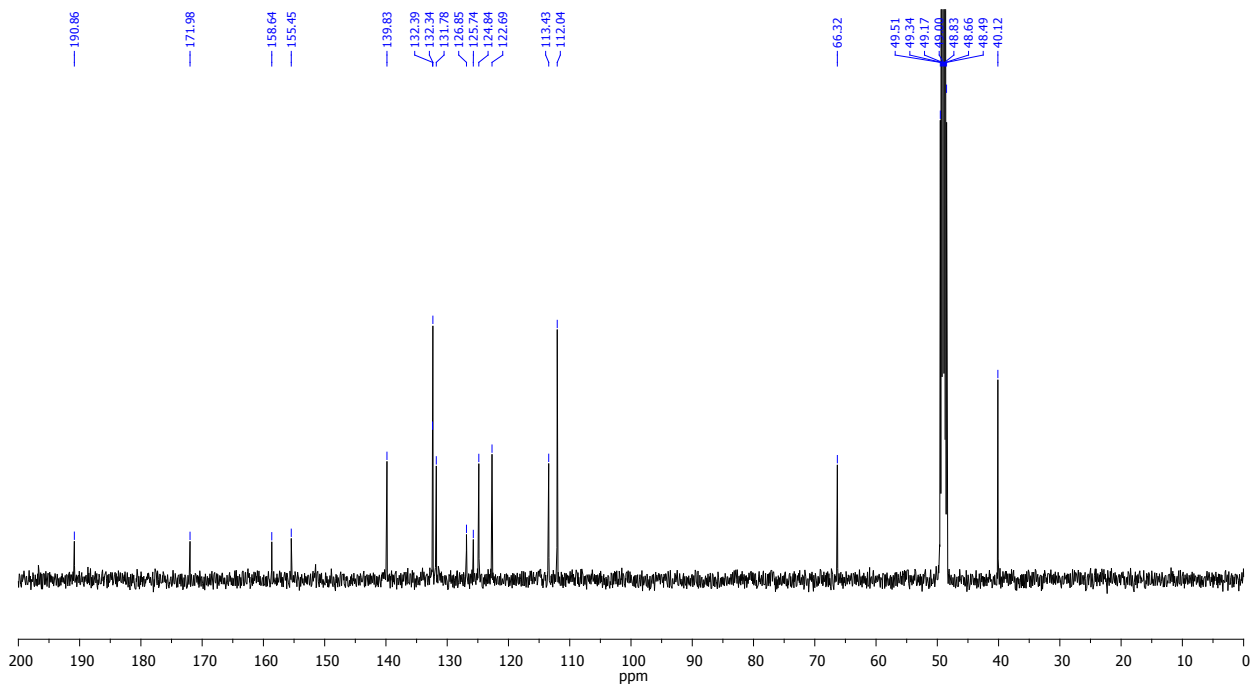

Figure S15.  $^1\text{H}$  NMR and  $^{13}\text{C}$  NMR spectra of compound 14d



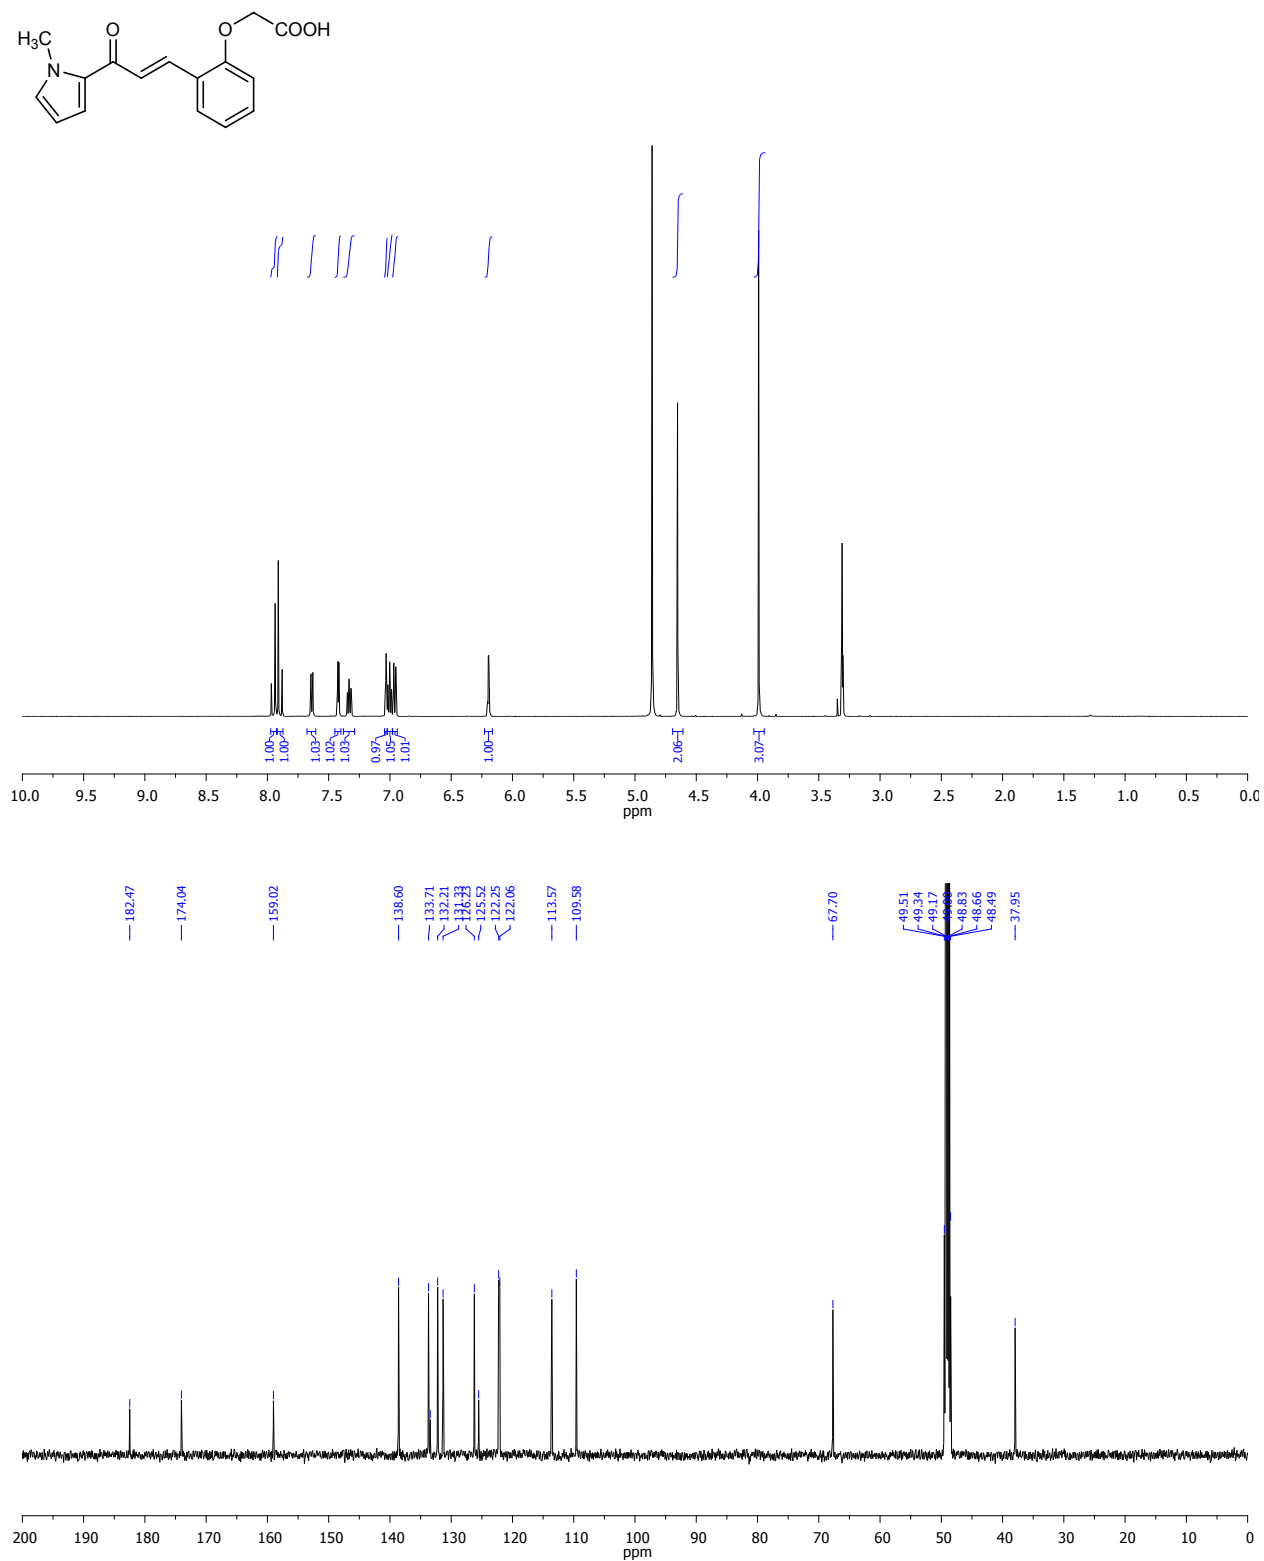

Figure S16. <sup>1</sup>H NMR and <sup>13</sup>C NMR spectra of compound 14e

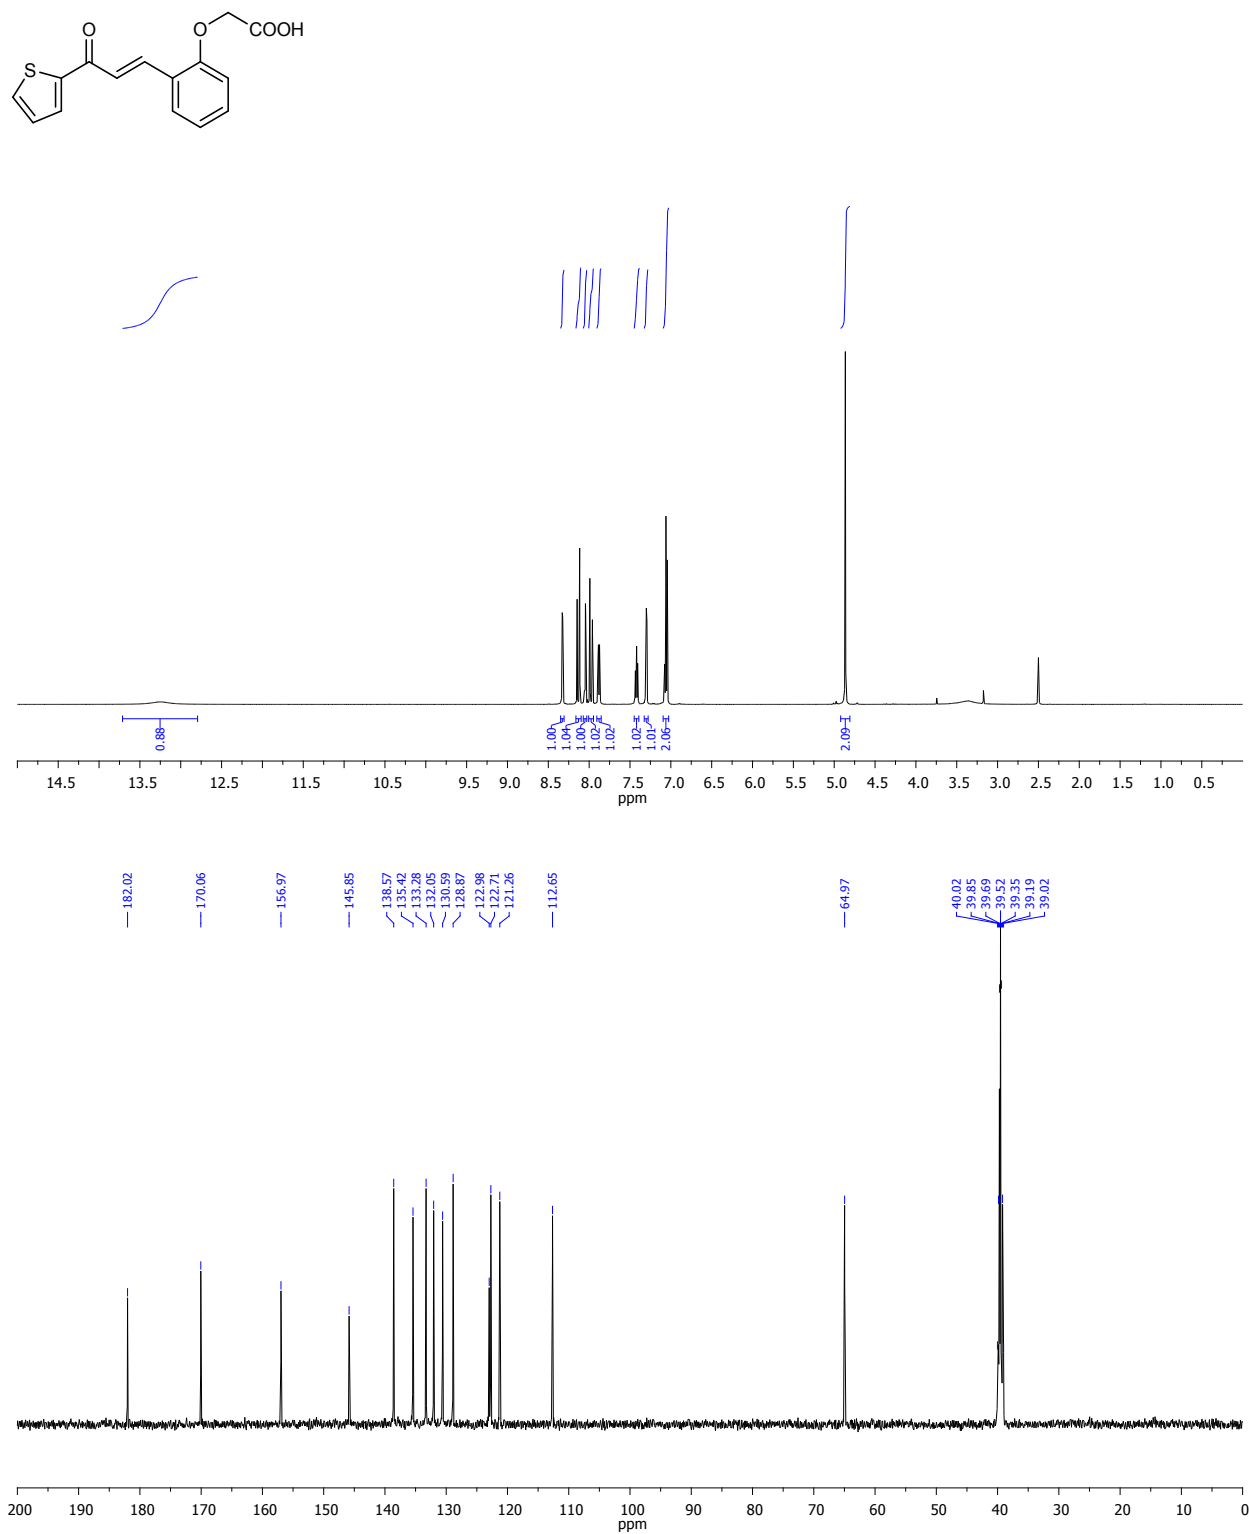

Figure S17. <sup>1</sup>H NMR and <sup>13</sup>C NMR spectra of compound 14f

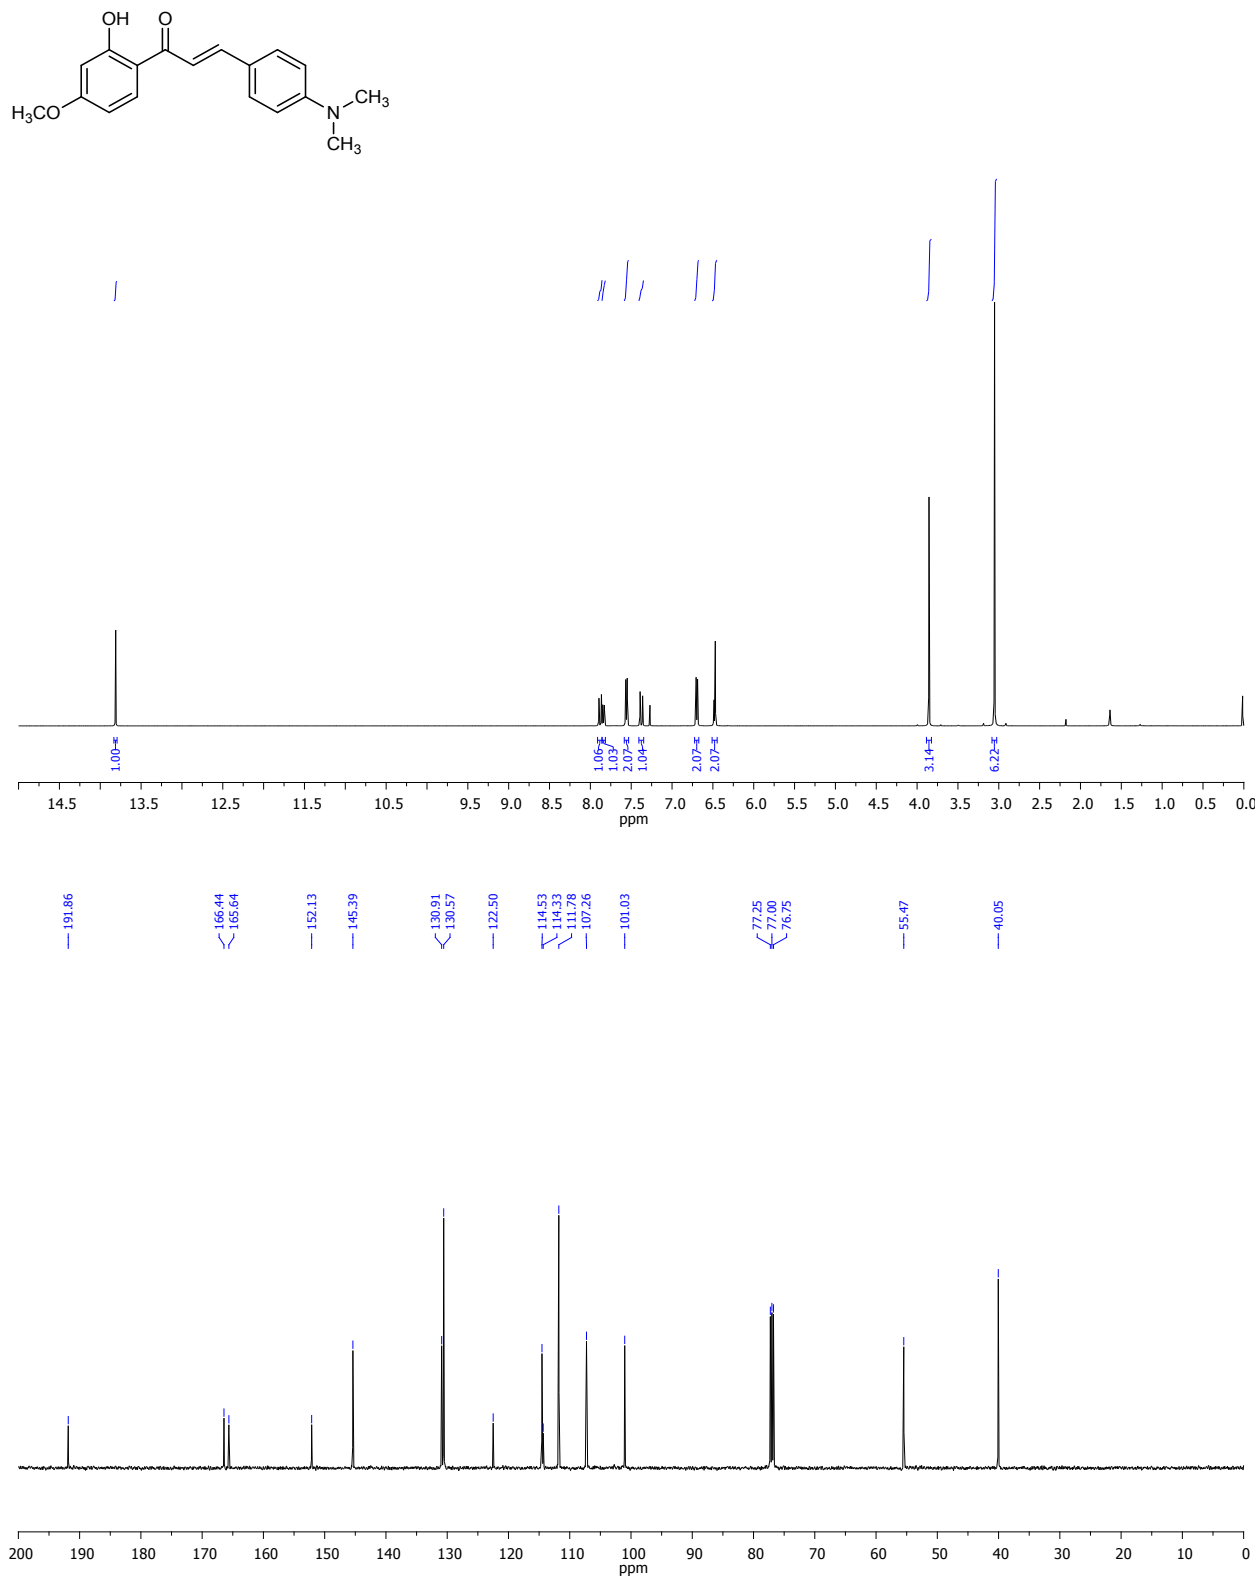

Figure S18. <sup>1</sup>H NMR and <sup>13</sup>C NMR spectra of compound 15c

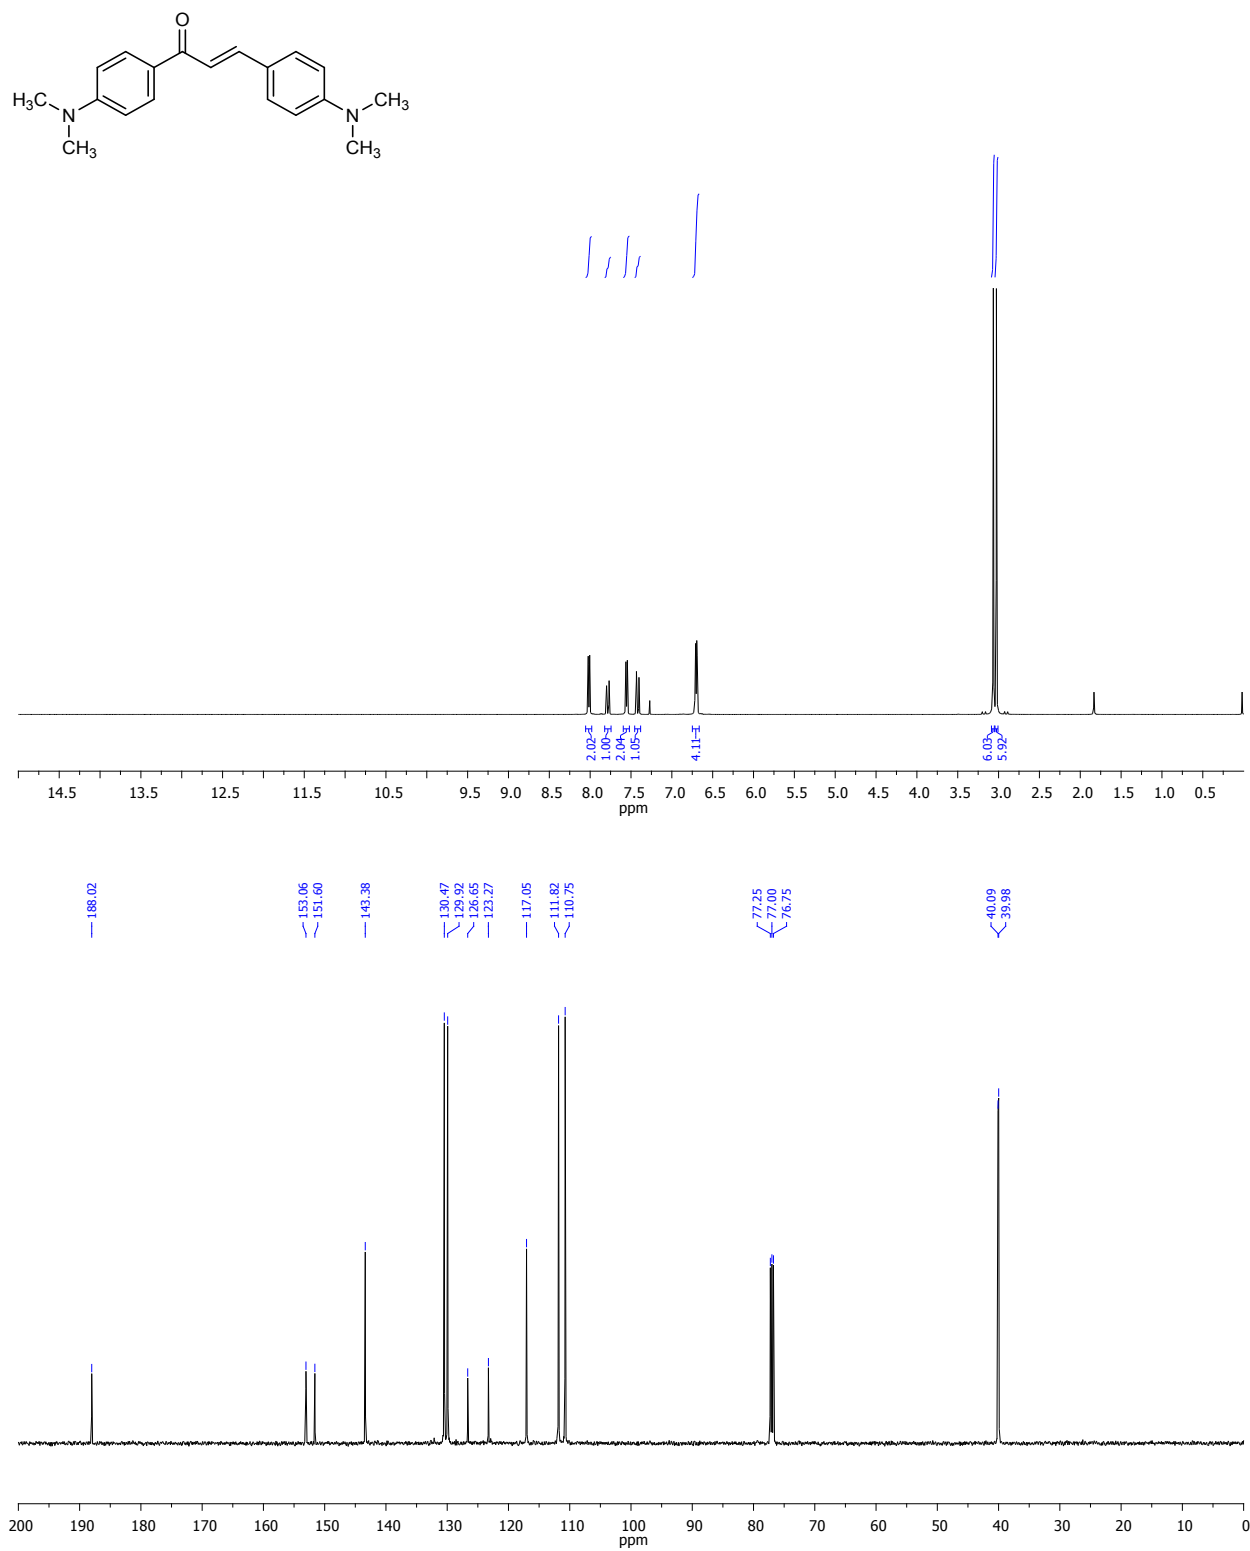

Figure S19.  $^1\text{H}$  NMR and  $^{13}\text{C}$  NMR spectra of compound 15d

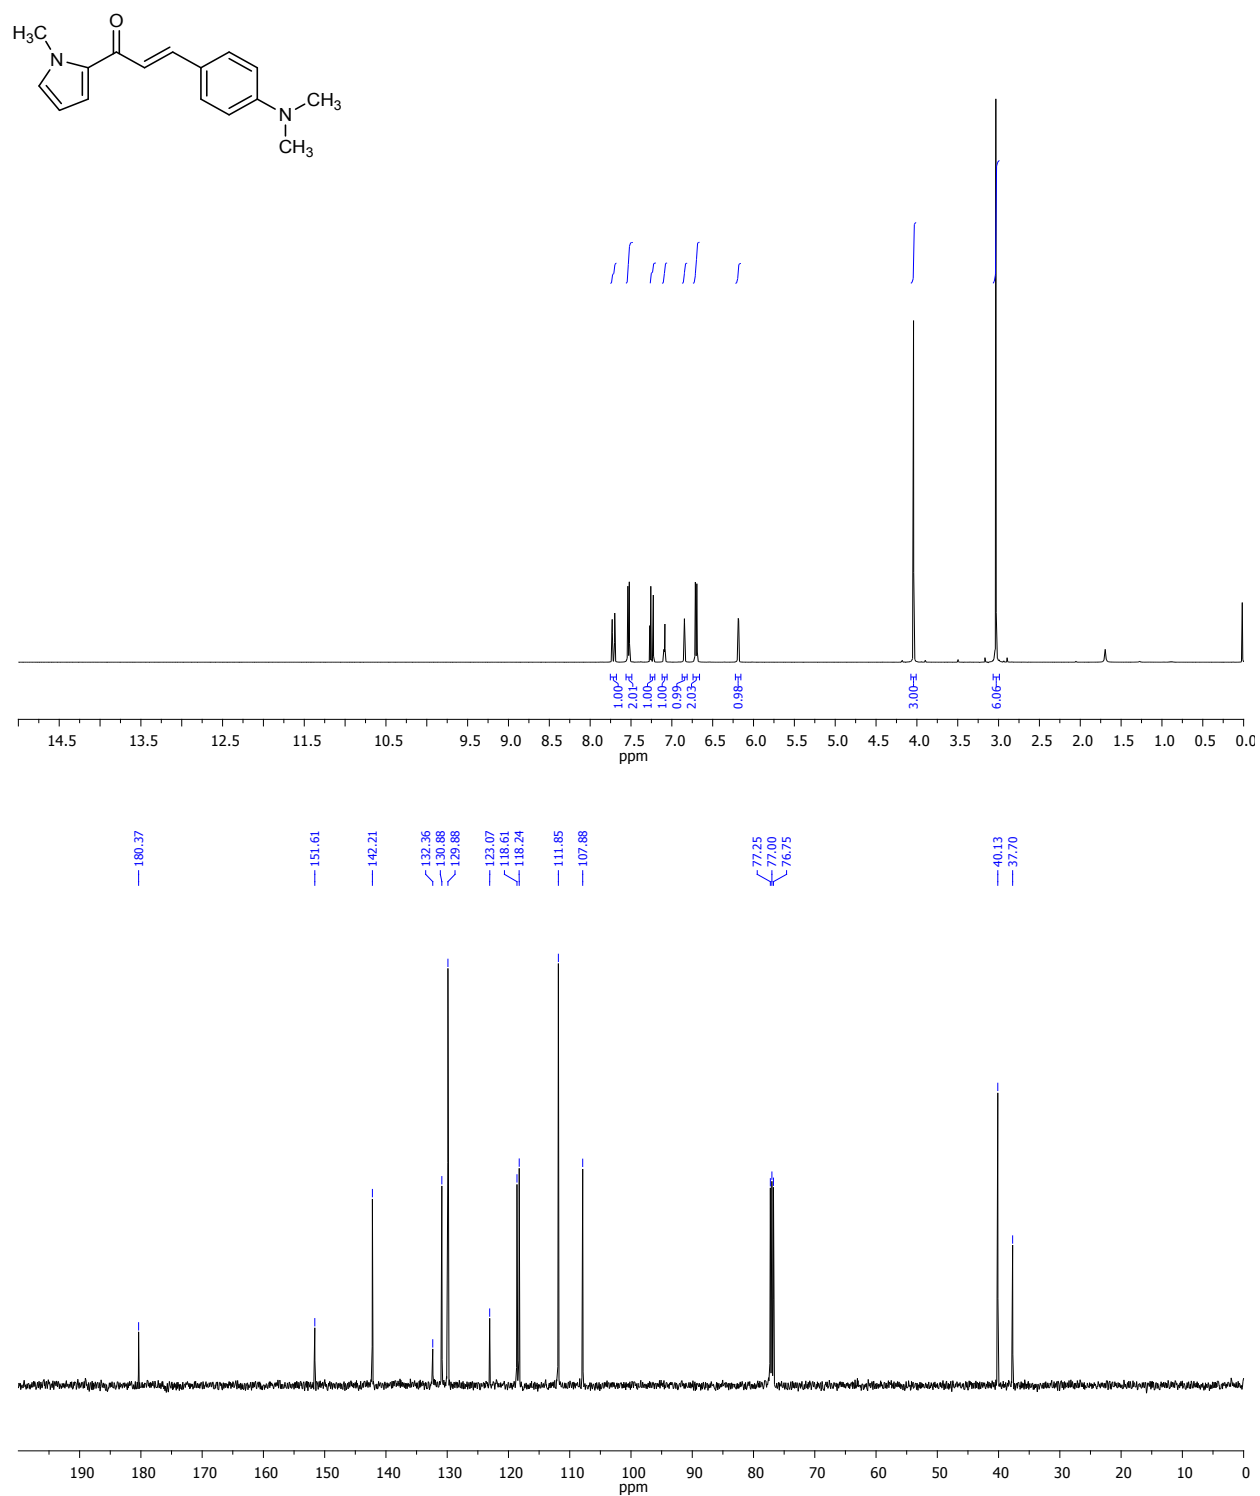

Figure S20. <sup>1</sup>H NMR and <sup>13</sup>C NMR spectra of compound 15e

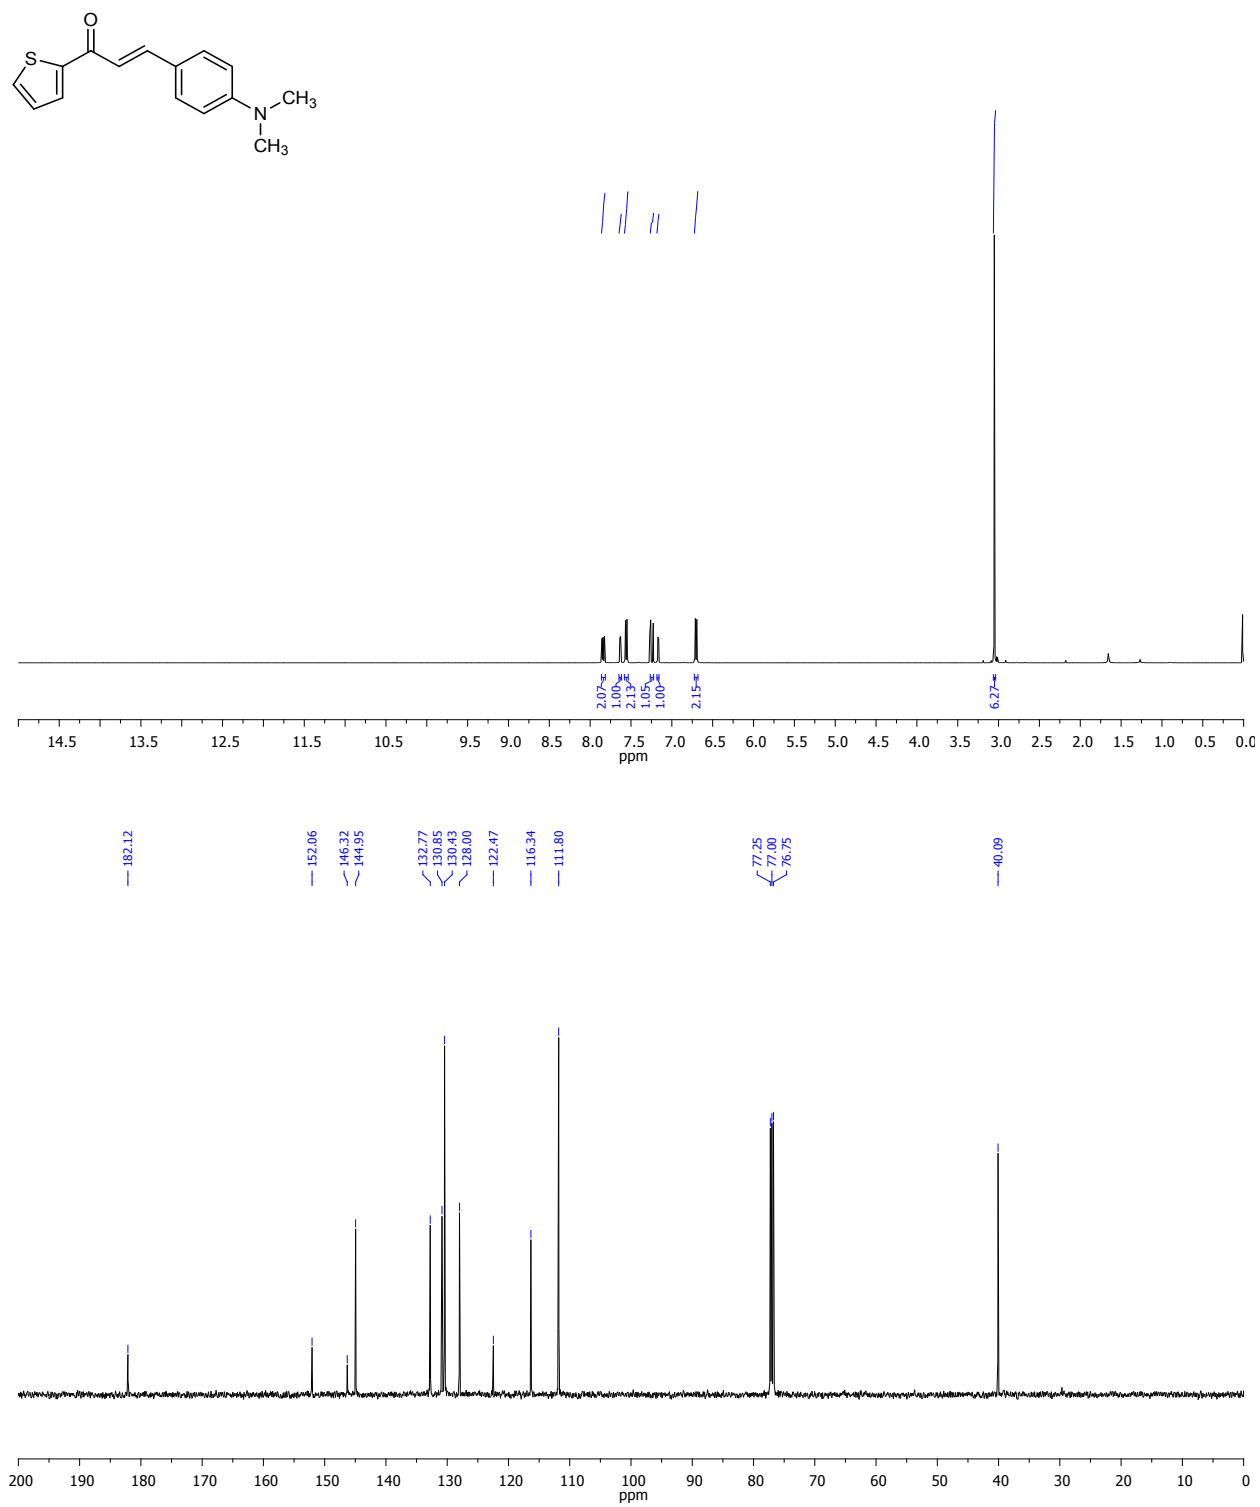

Figure S21. <sup>1</sup>H NMR and <sup>13</sup>C NMR spectra of compound 15f

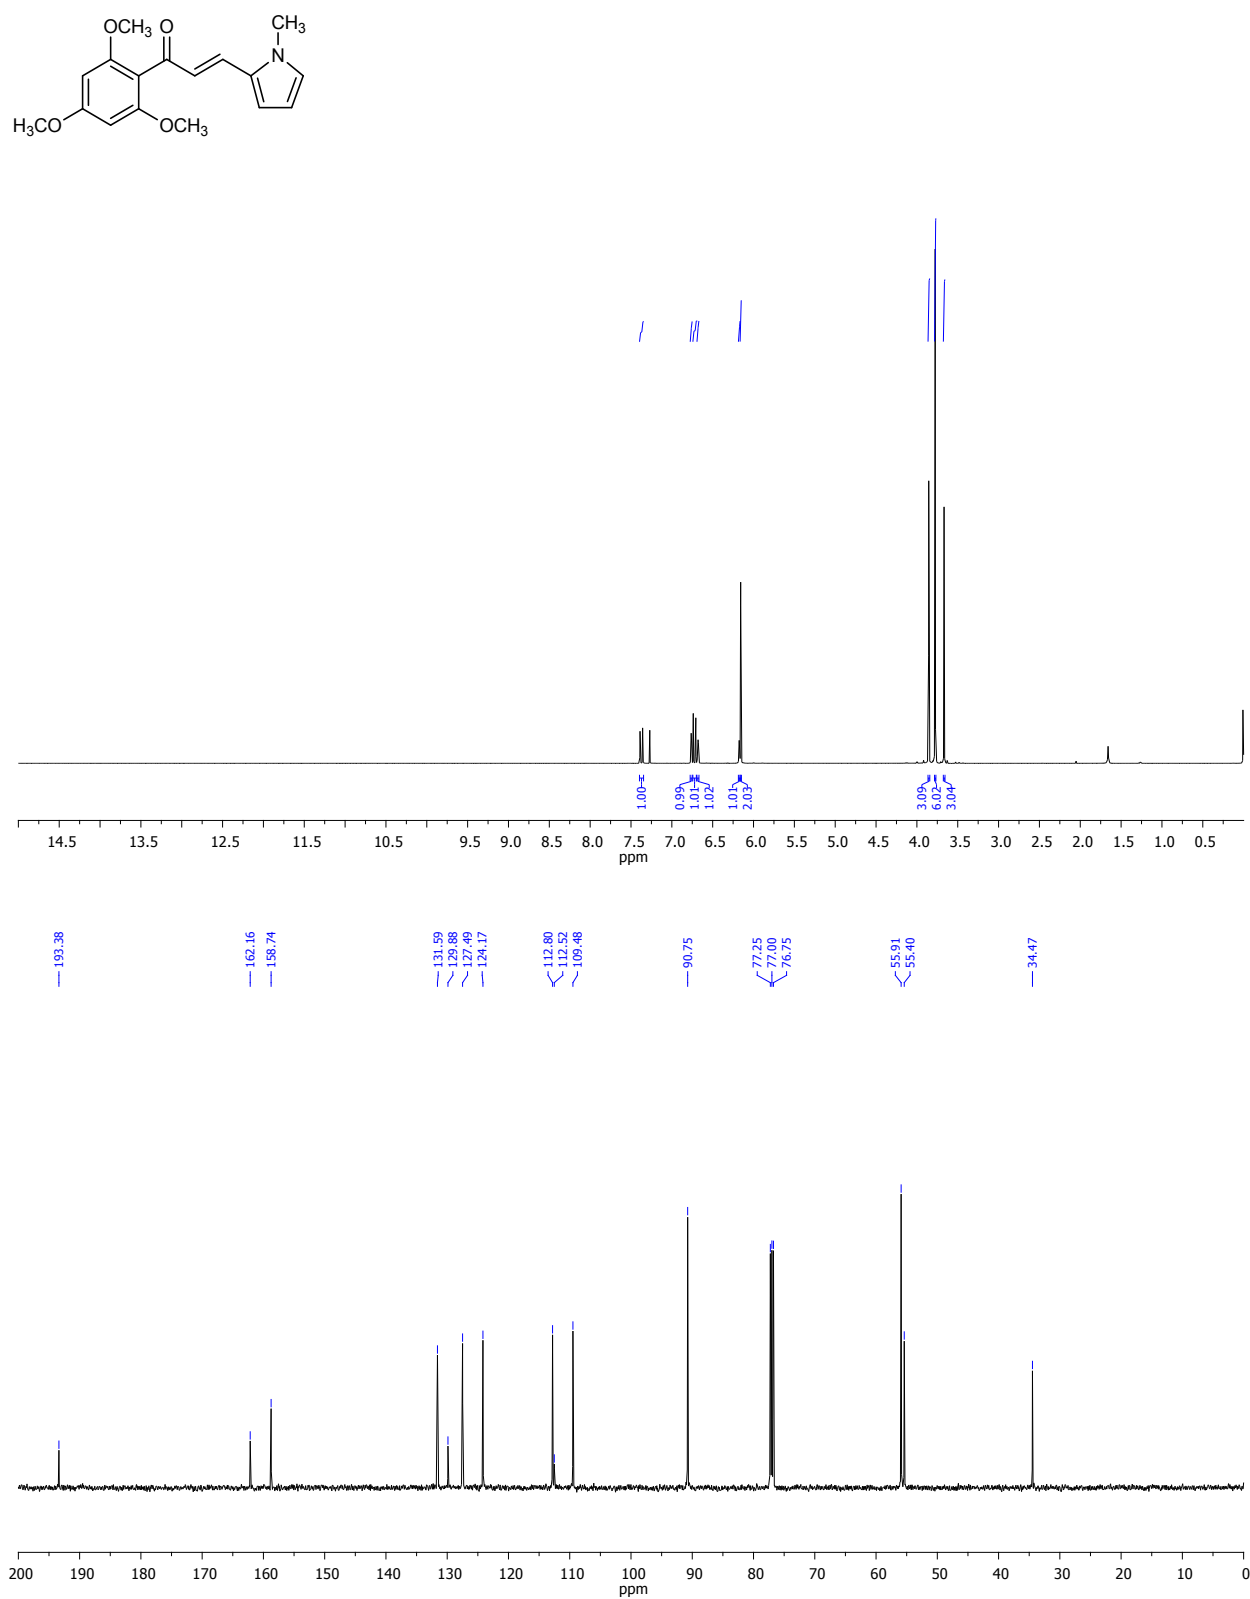

**Figure S22.** <sup>1</sup>H NMR and <sup>13</sup>C NMR spectra of compound **17a**

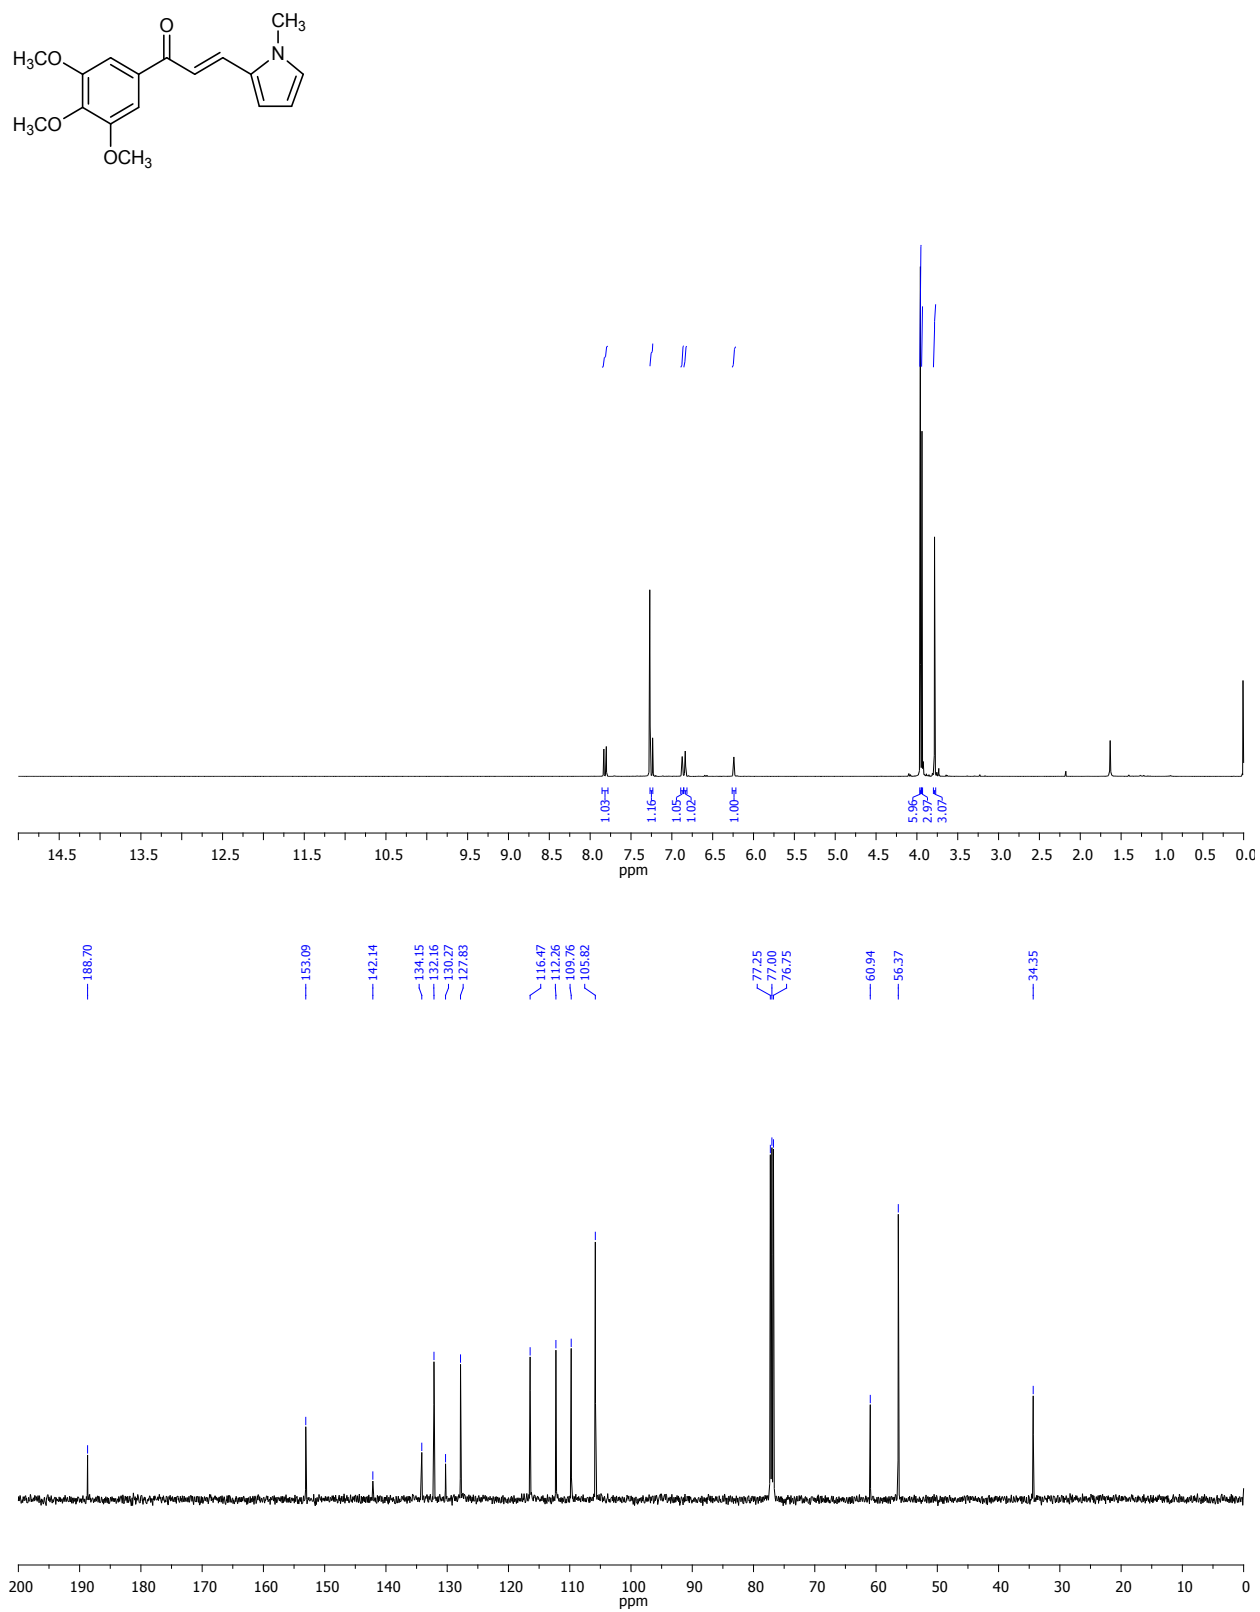

Figure S23. <sup>1</sup>H NMR and <sup>13</sup>C NMR spectra of compound 17b



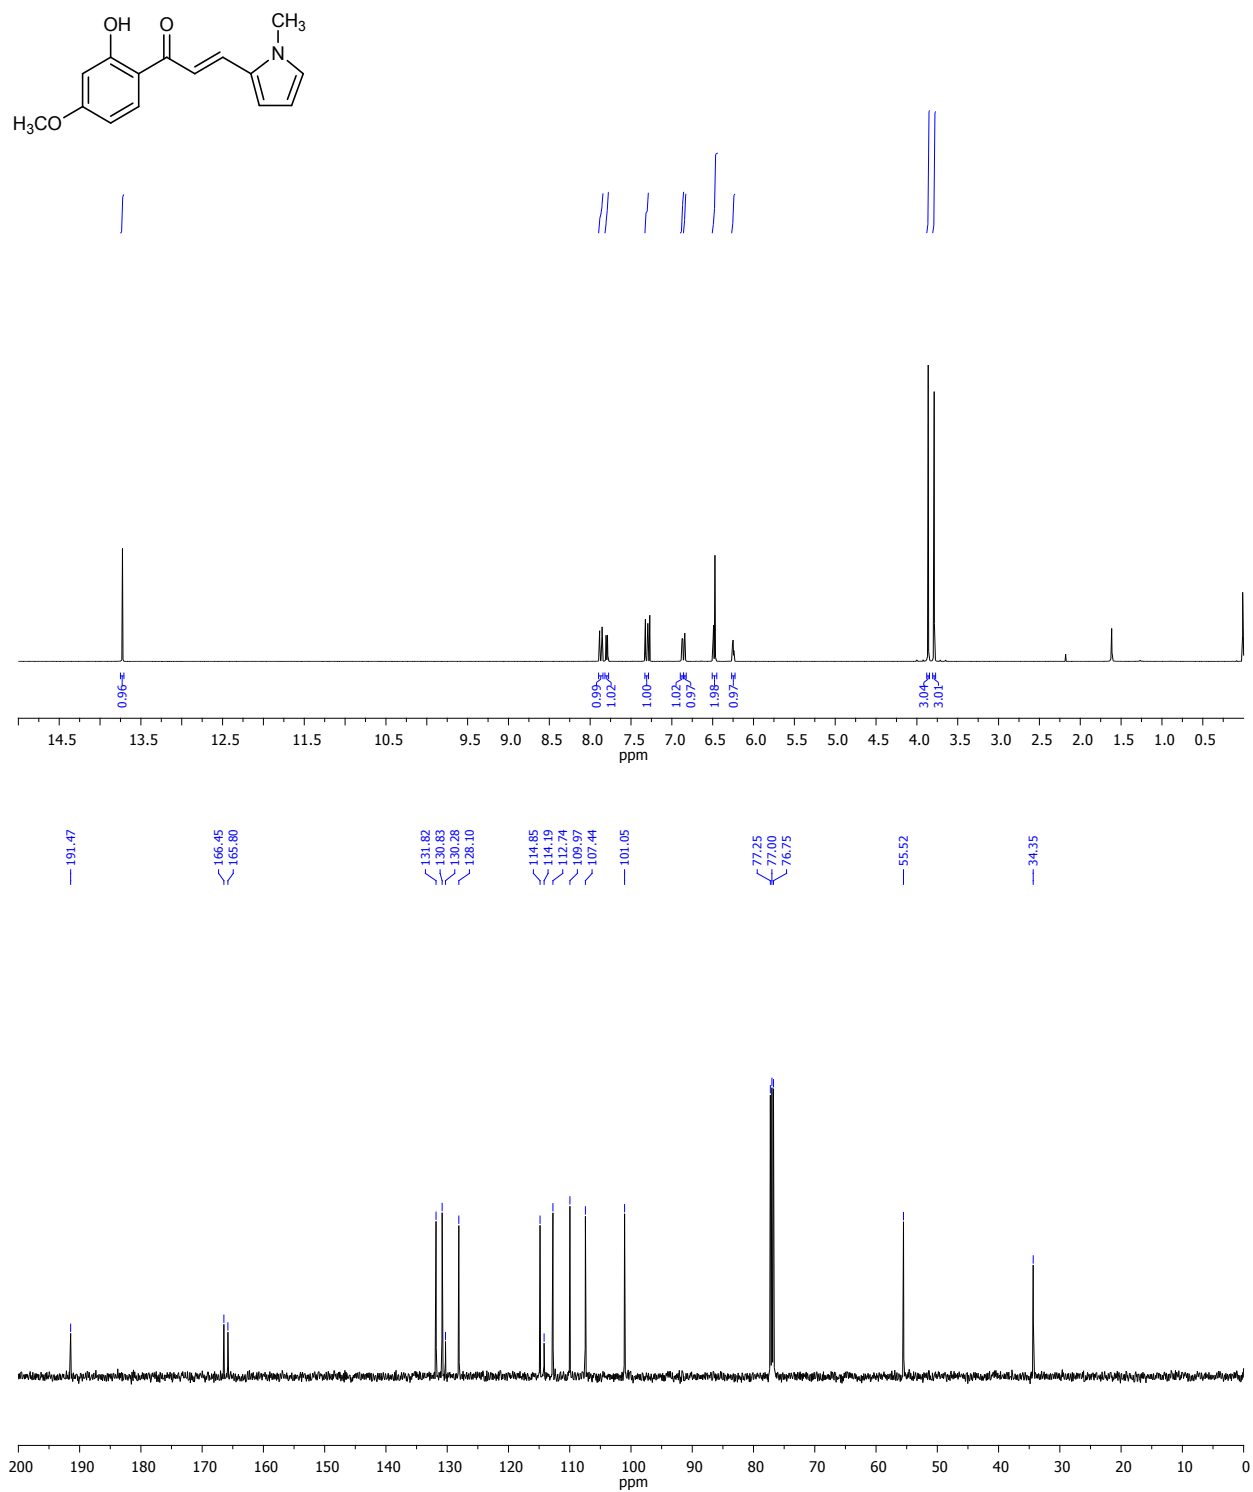

Figure S24. <sup>1</sup>H NMR and <sup>13</sup>C NMR spectra of compound 17c

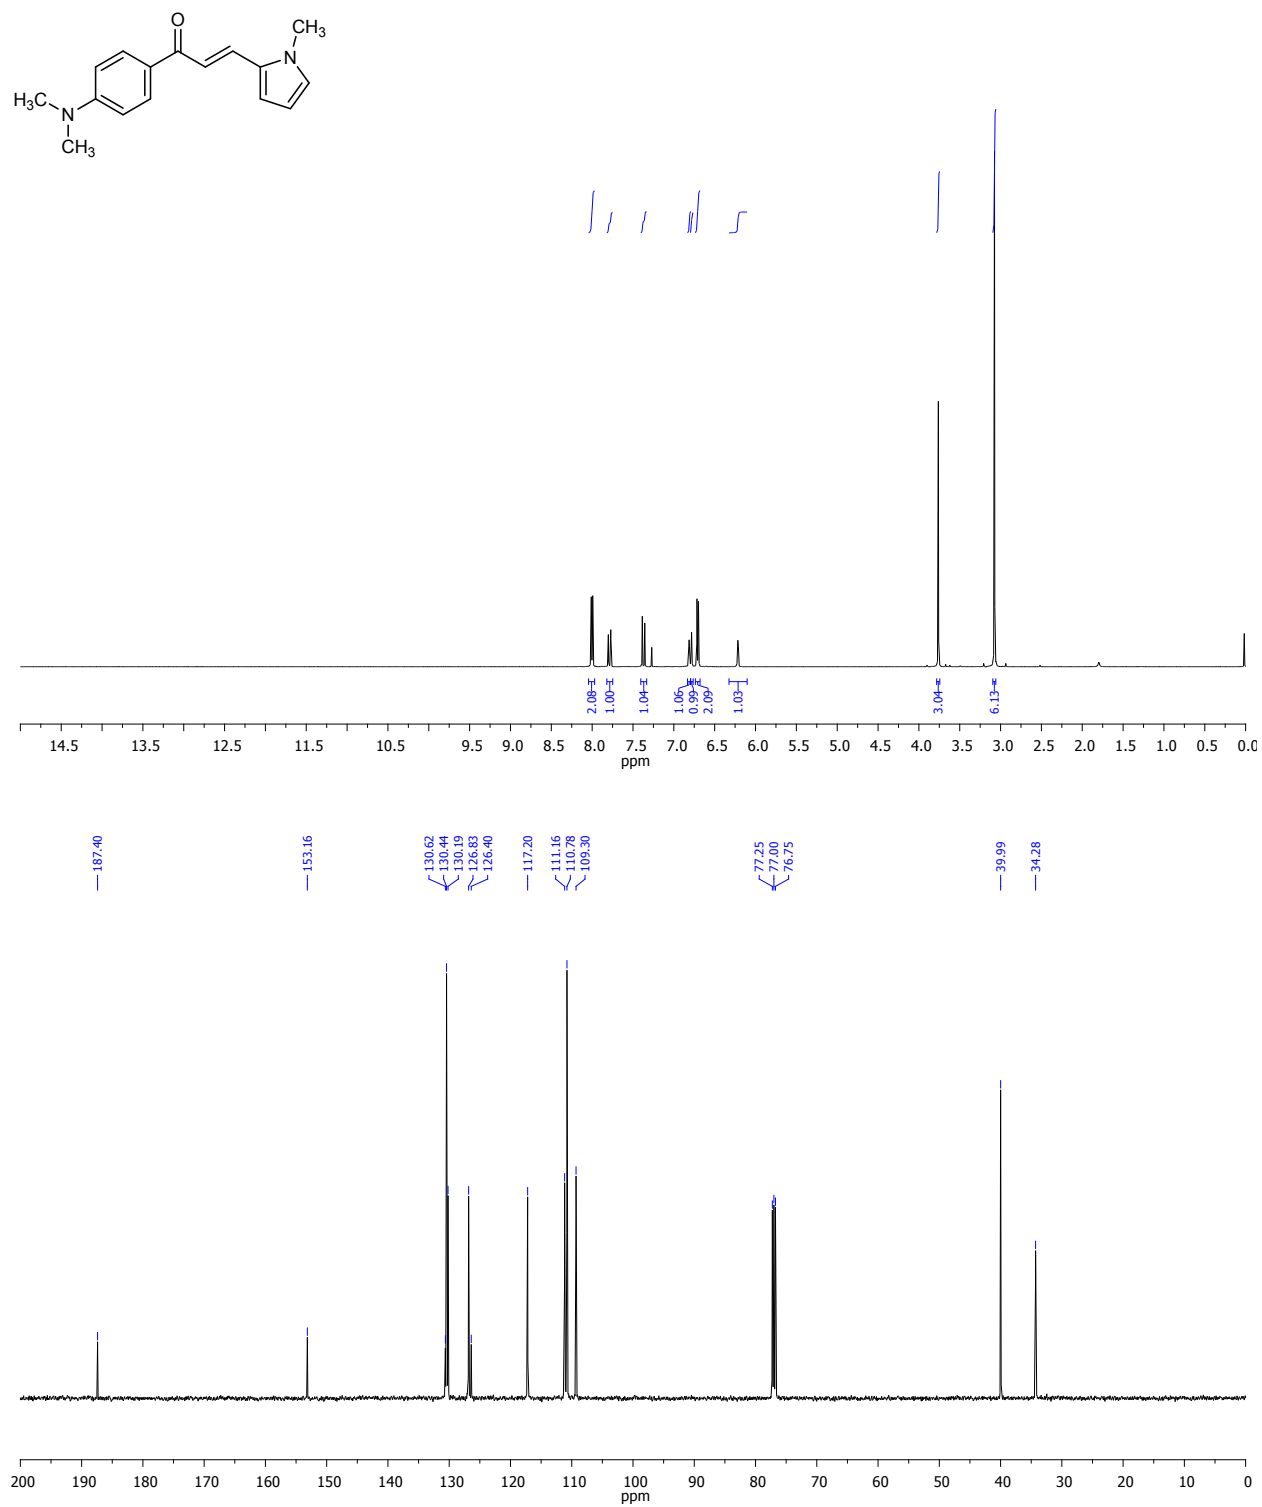

Figure S25. <sup>1</sup>H NMR and <sup>13</sup>C NMR spectra of compound 17d

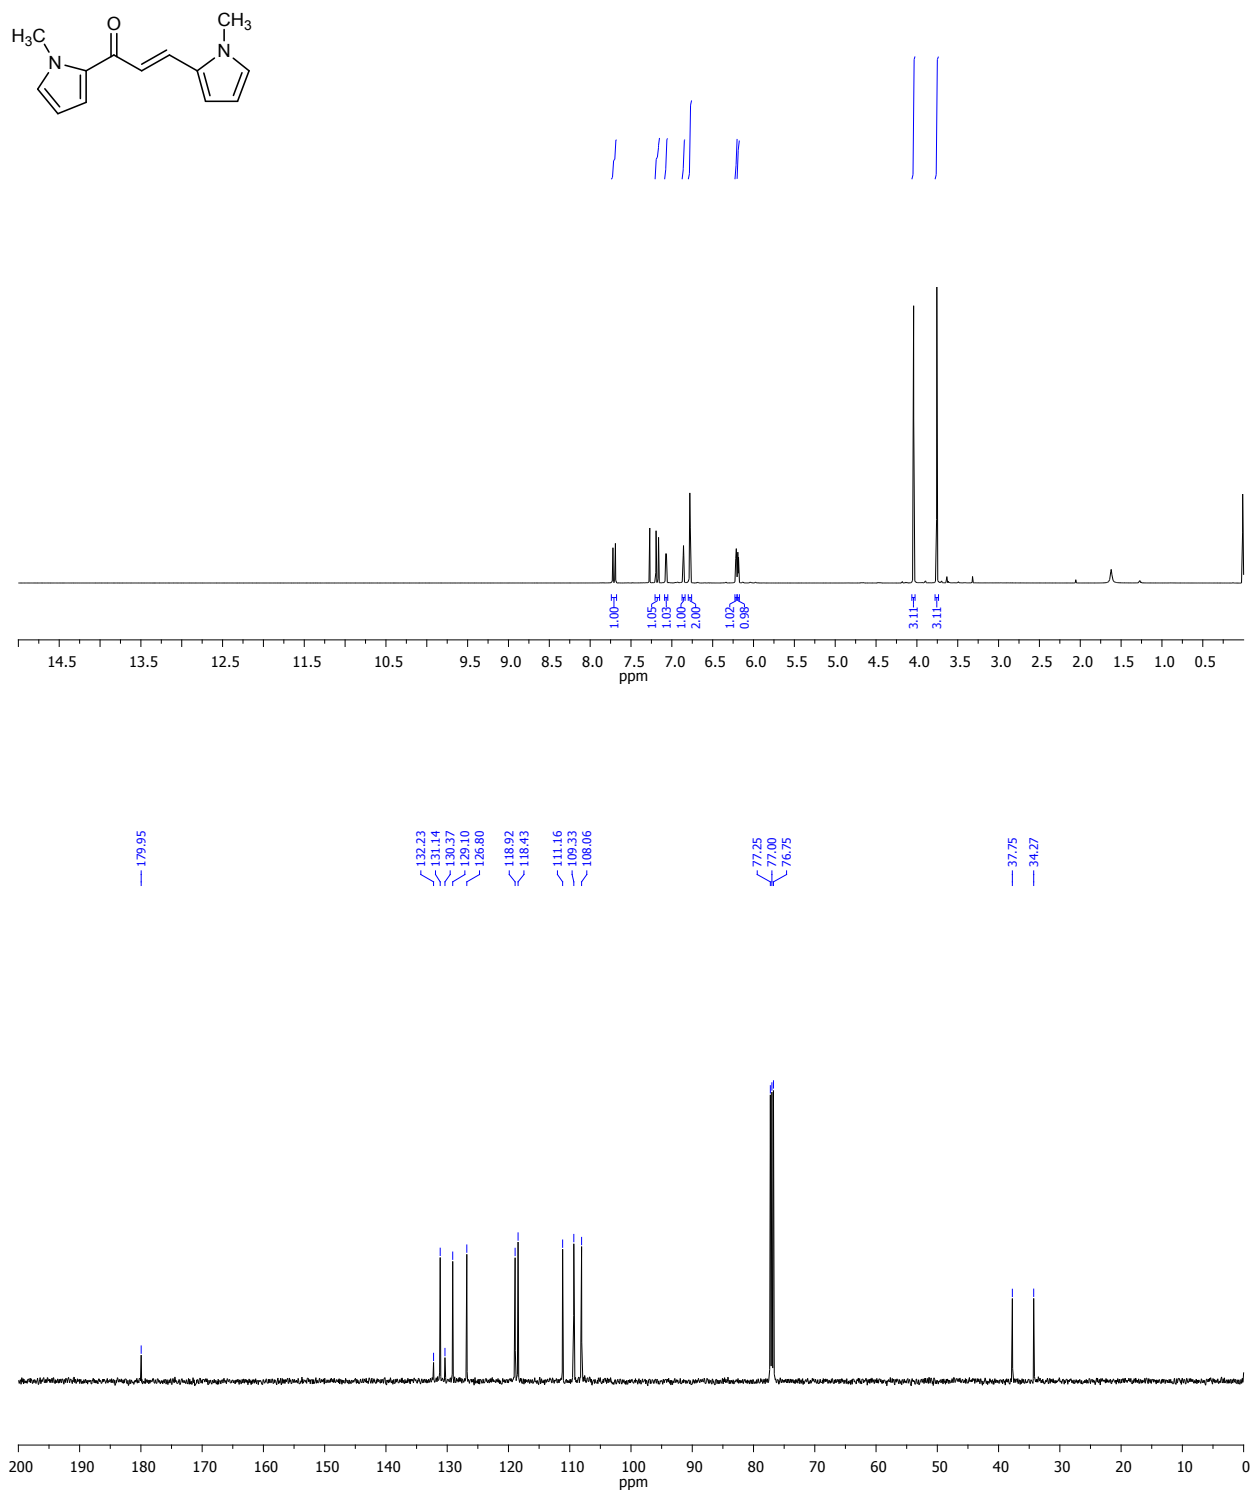

Figure S26.  $^1\text{H}$  NMR and  $^{13}\text{C}$  NMR spectra of compound 17e

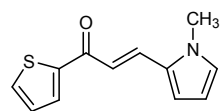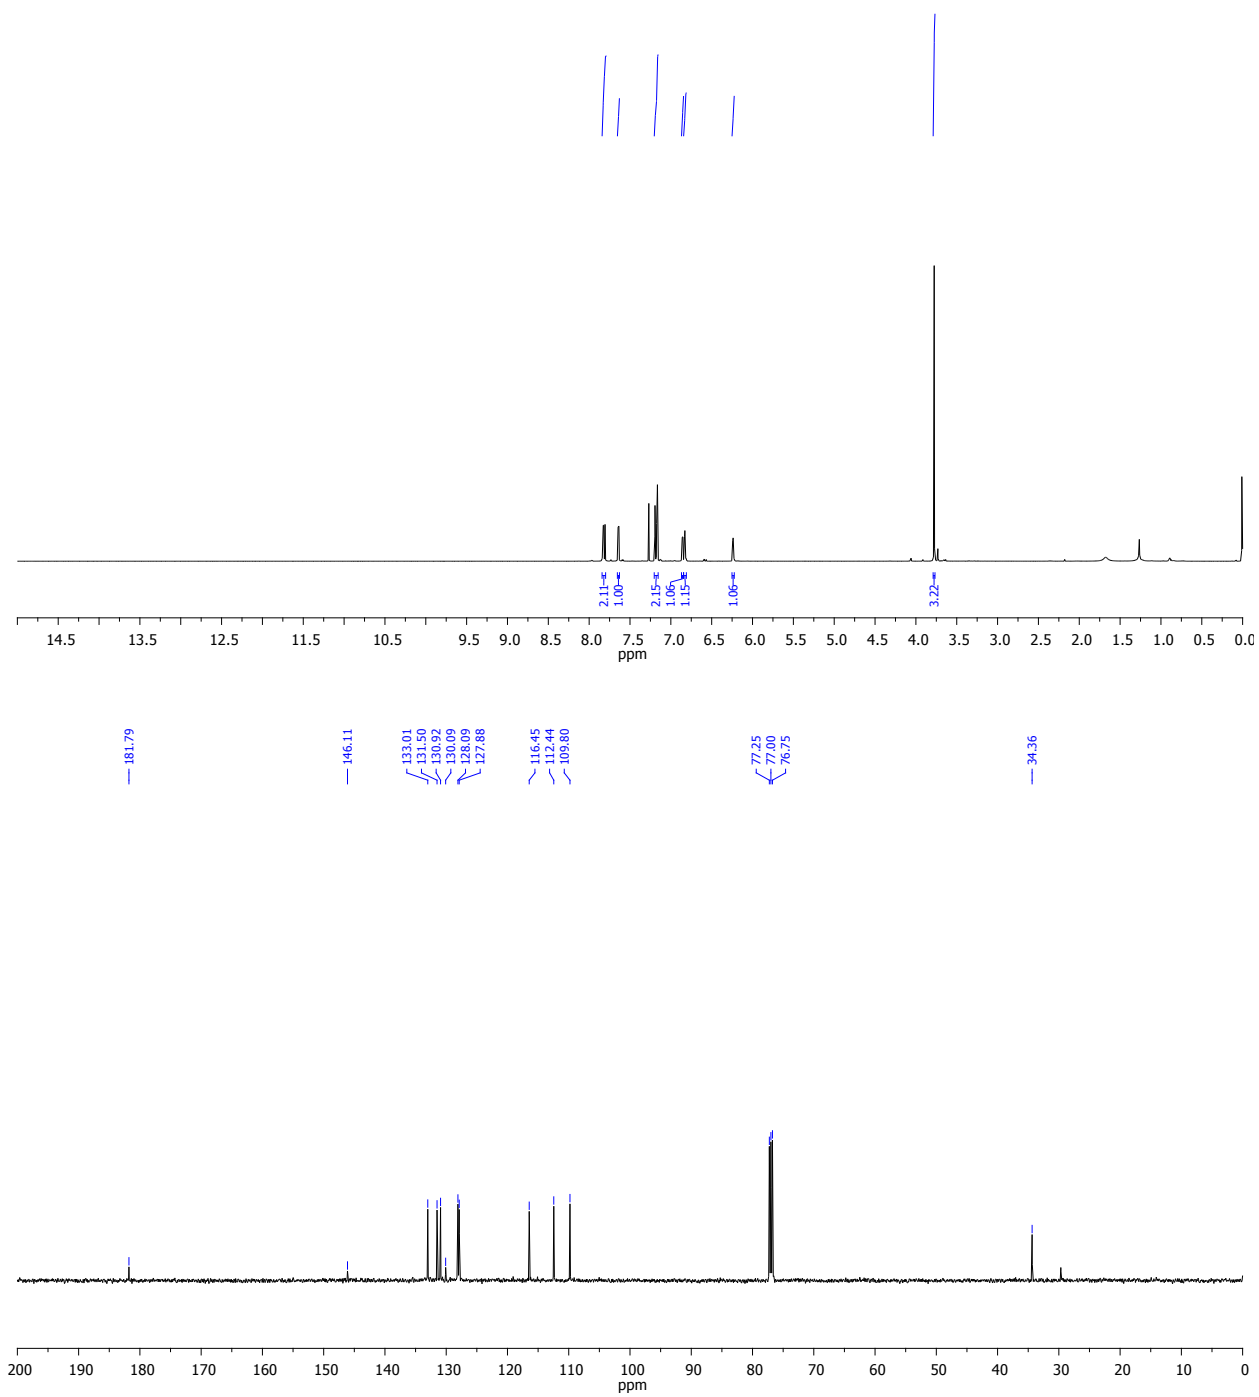

Figure S27.  $^1\text{H}$  NMR and  $^{13}\text{C}$  NMR spectra of compound 17f

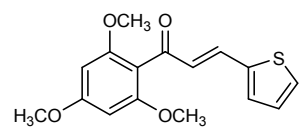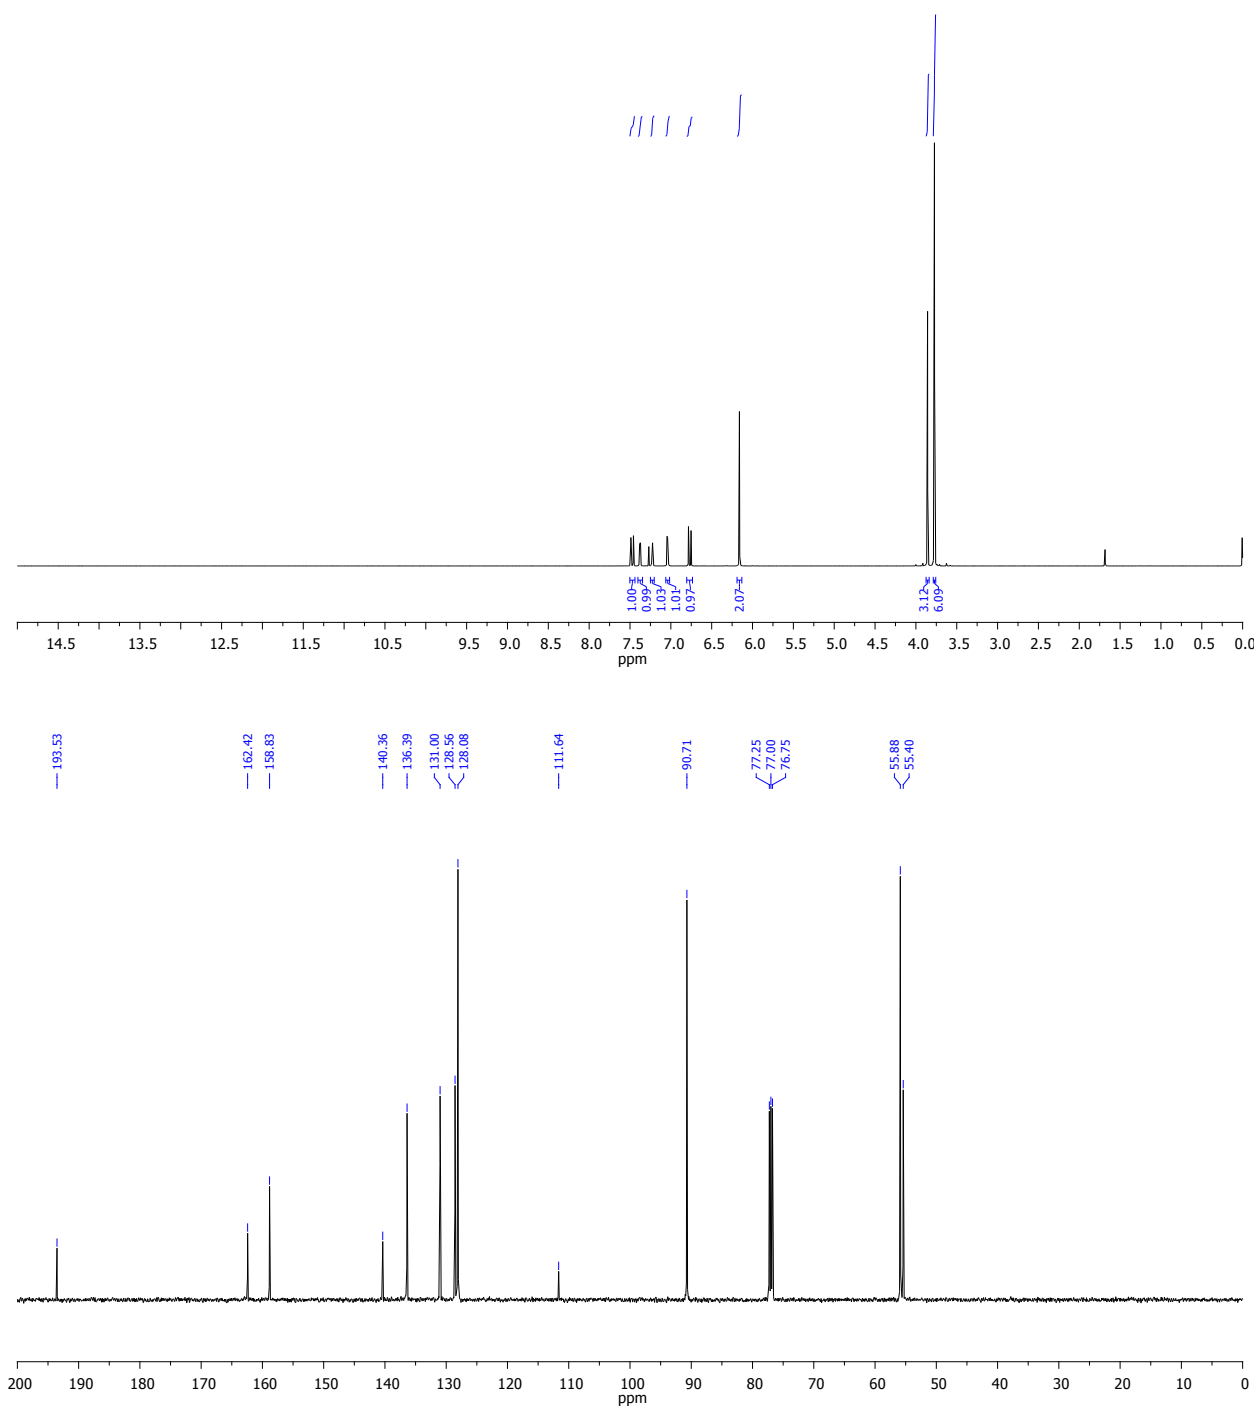

Figure S28. <sup>1</sup>H NMR and <sup>13</sup>C NMR spectra of compound 18a

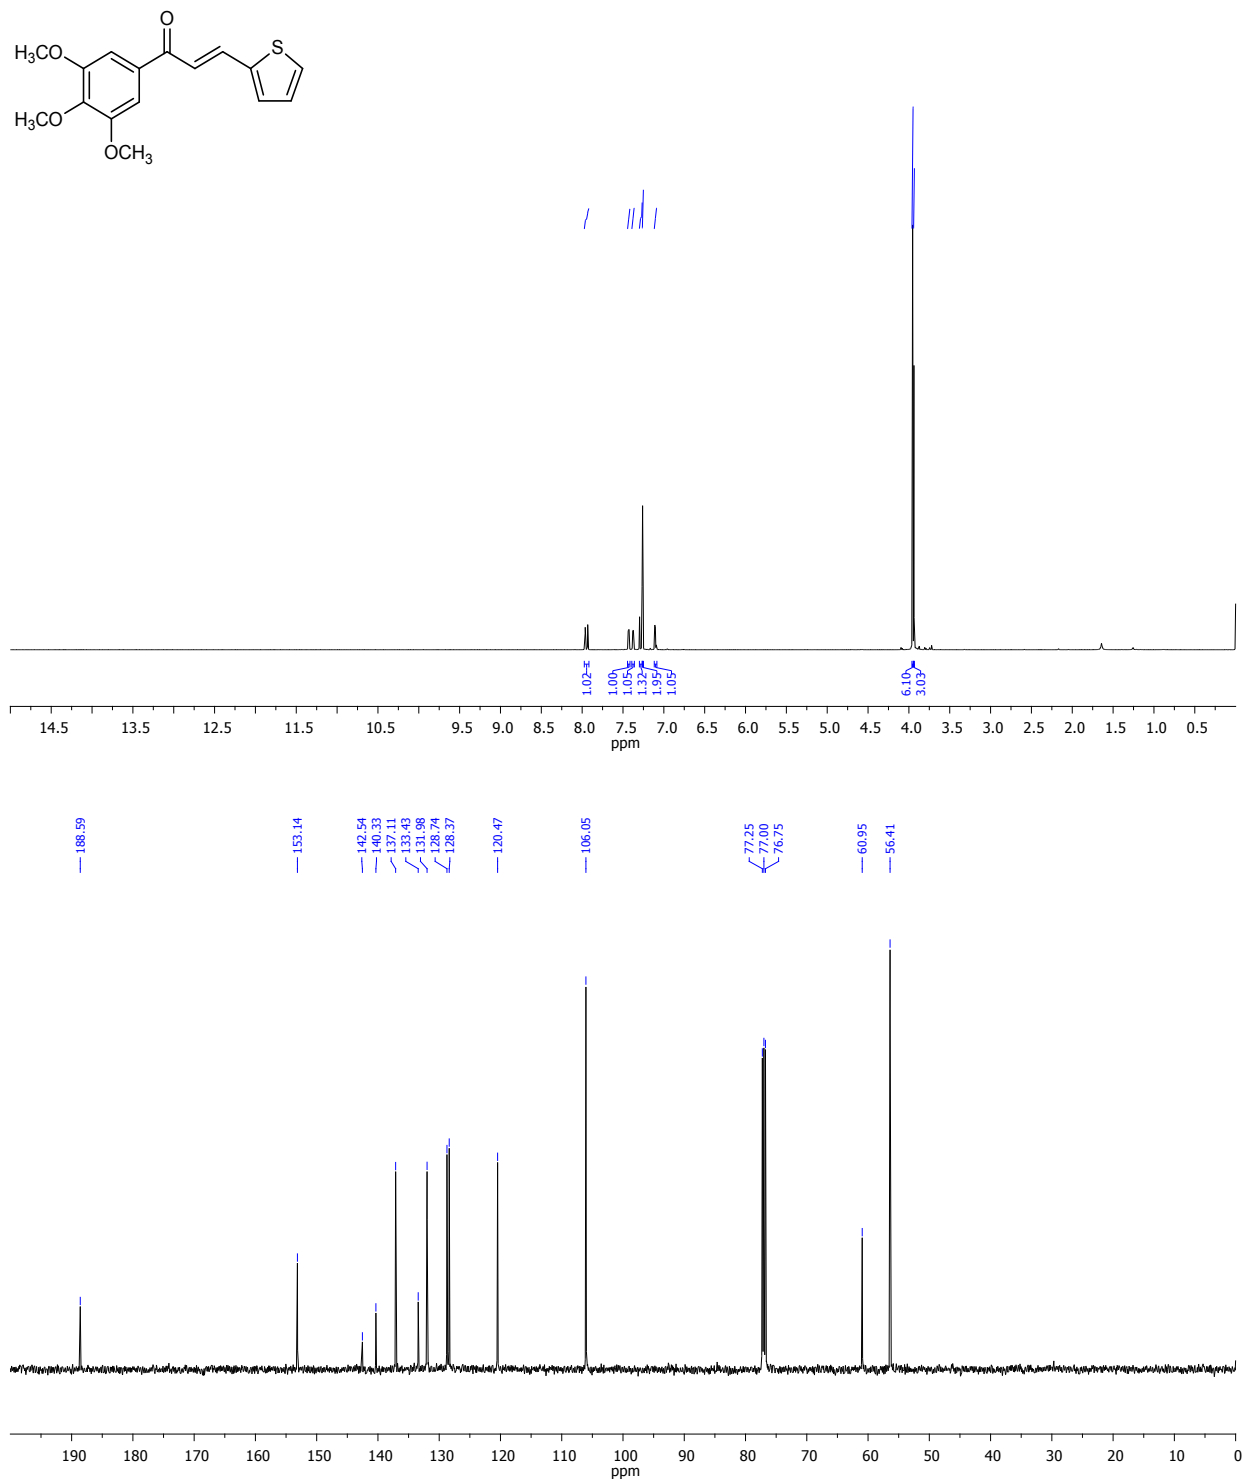

Figure S29.  $^1\text{H}$  NMR and  $^{13}\text{C}$  NMR spectra of compound **18b**

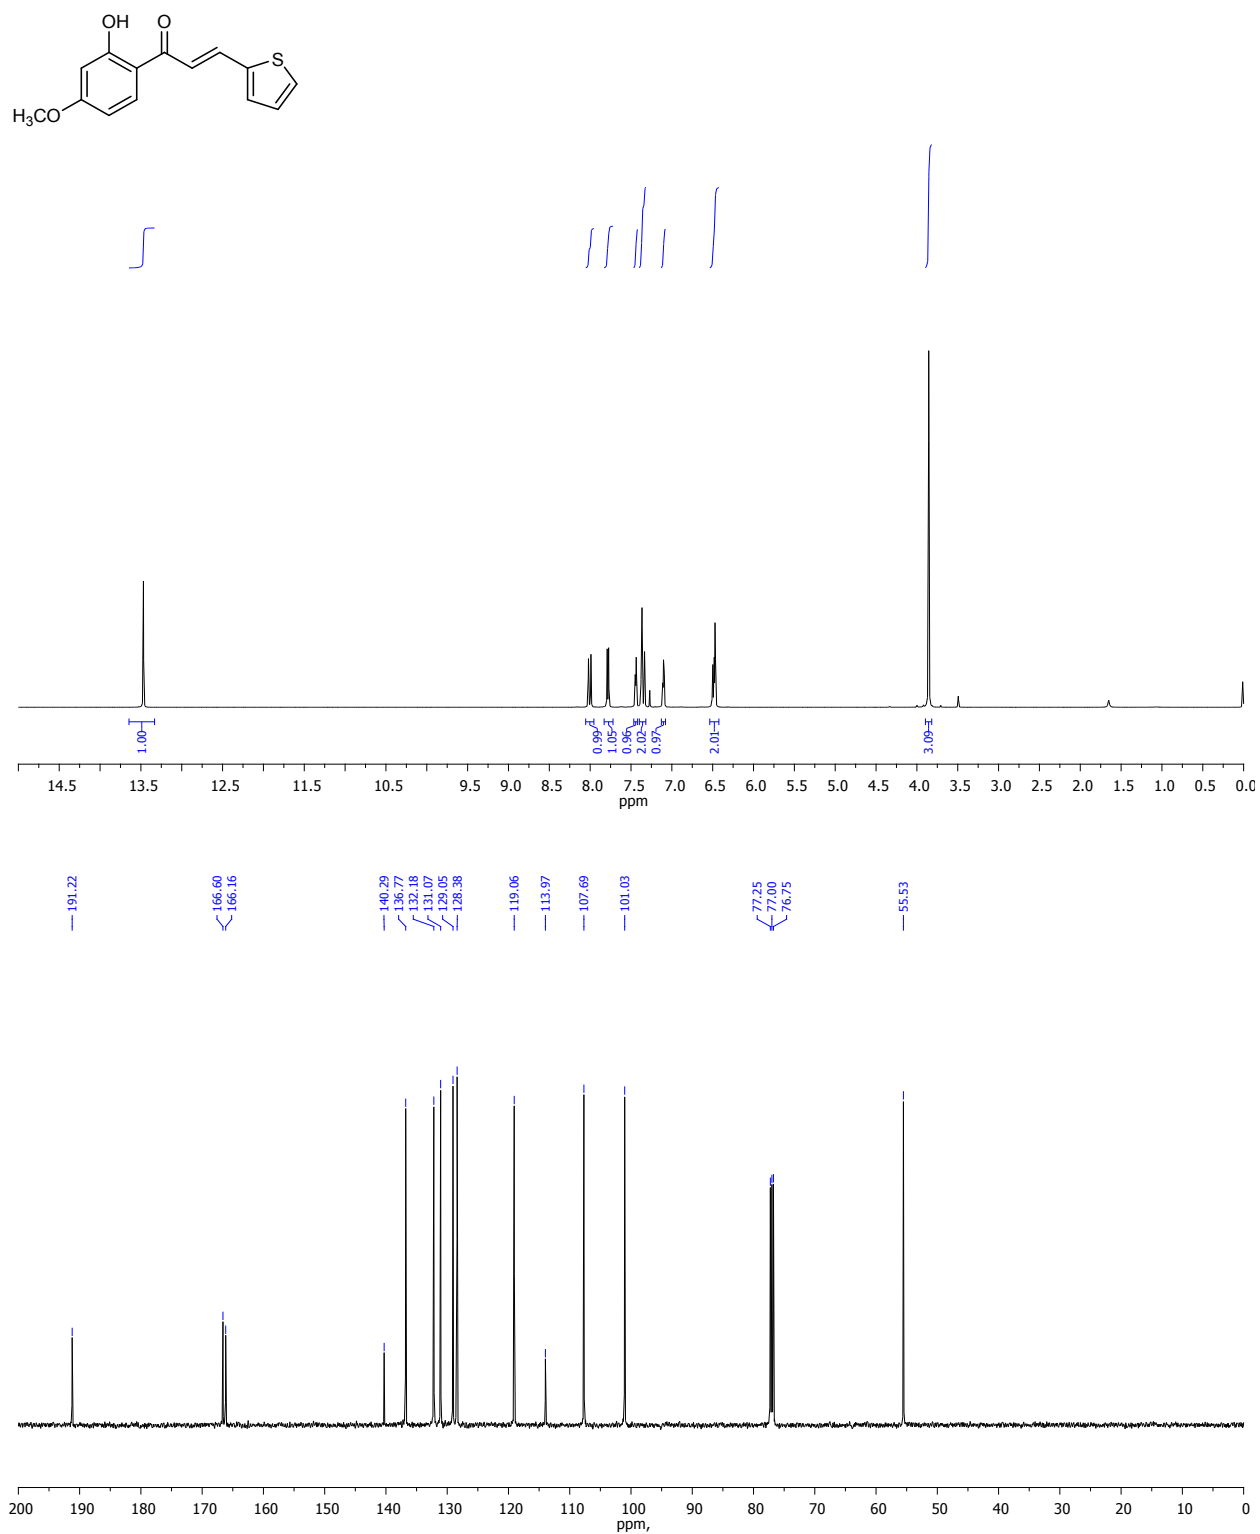

Figure S30.  $^1\text{H}$  NMR and  $^{13}\text{C}$  NMR spectra of compound **18c**

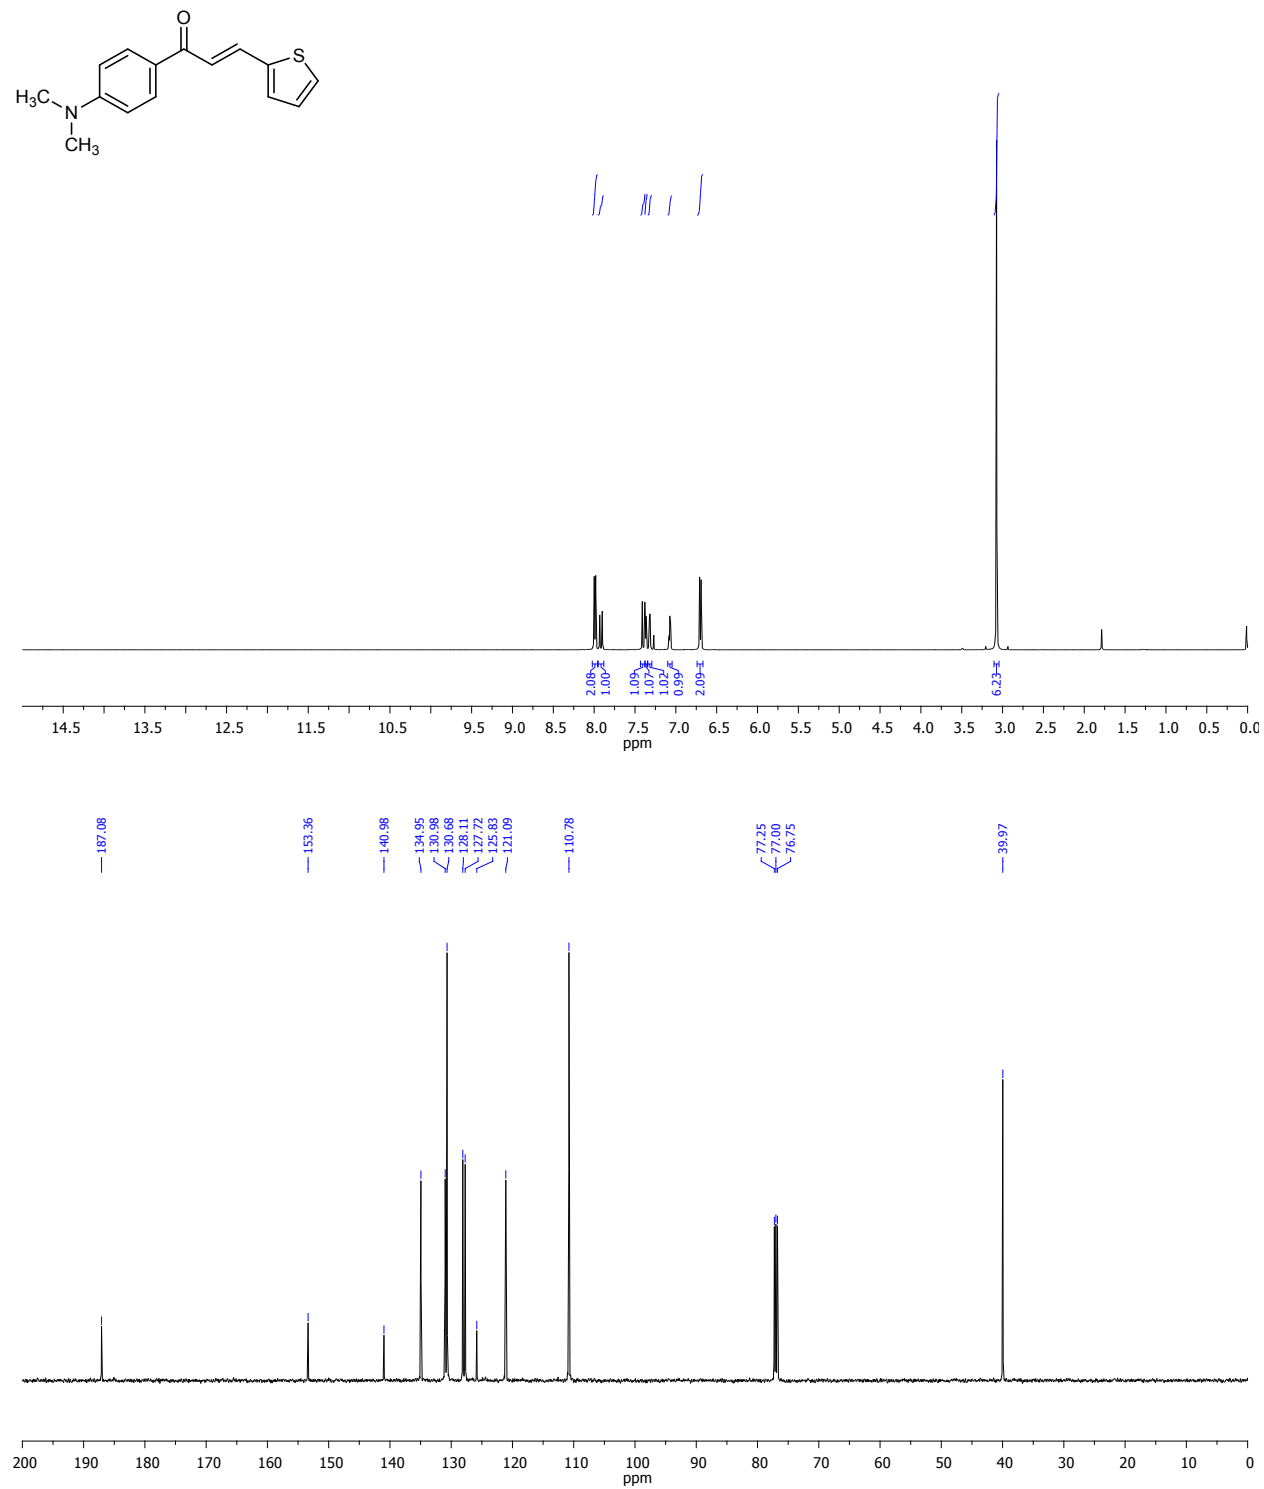

Figure S31. <sup>1</sup>H NMR and <sup>13</sup>C NMR spectra of compound 18d



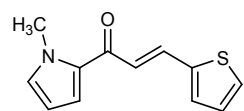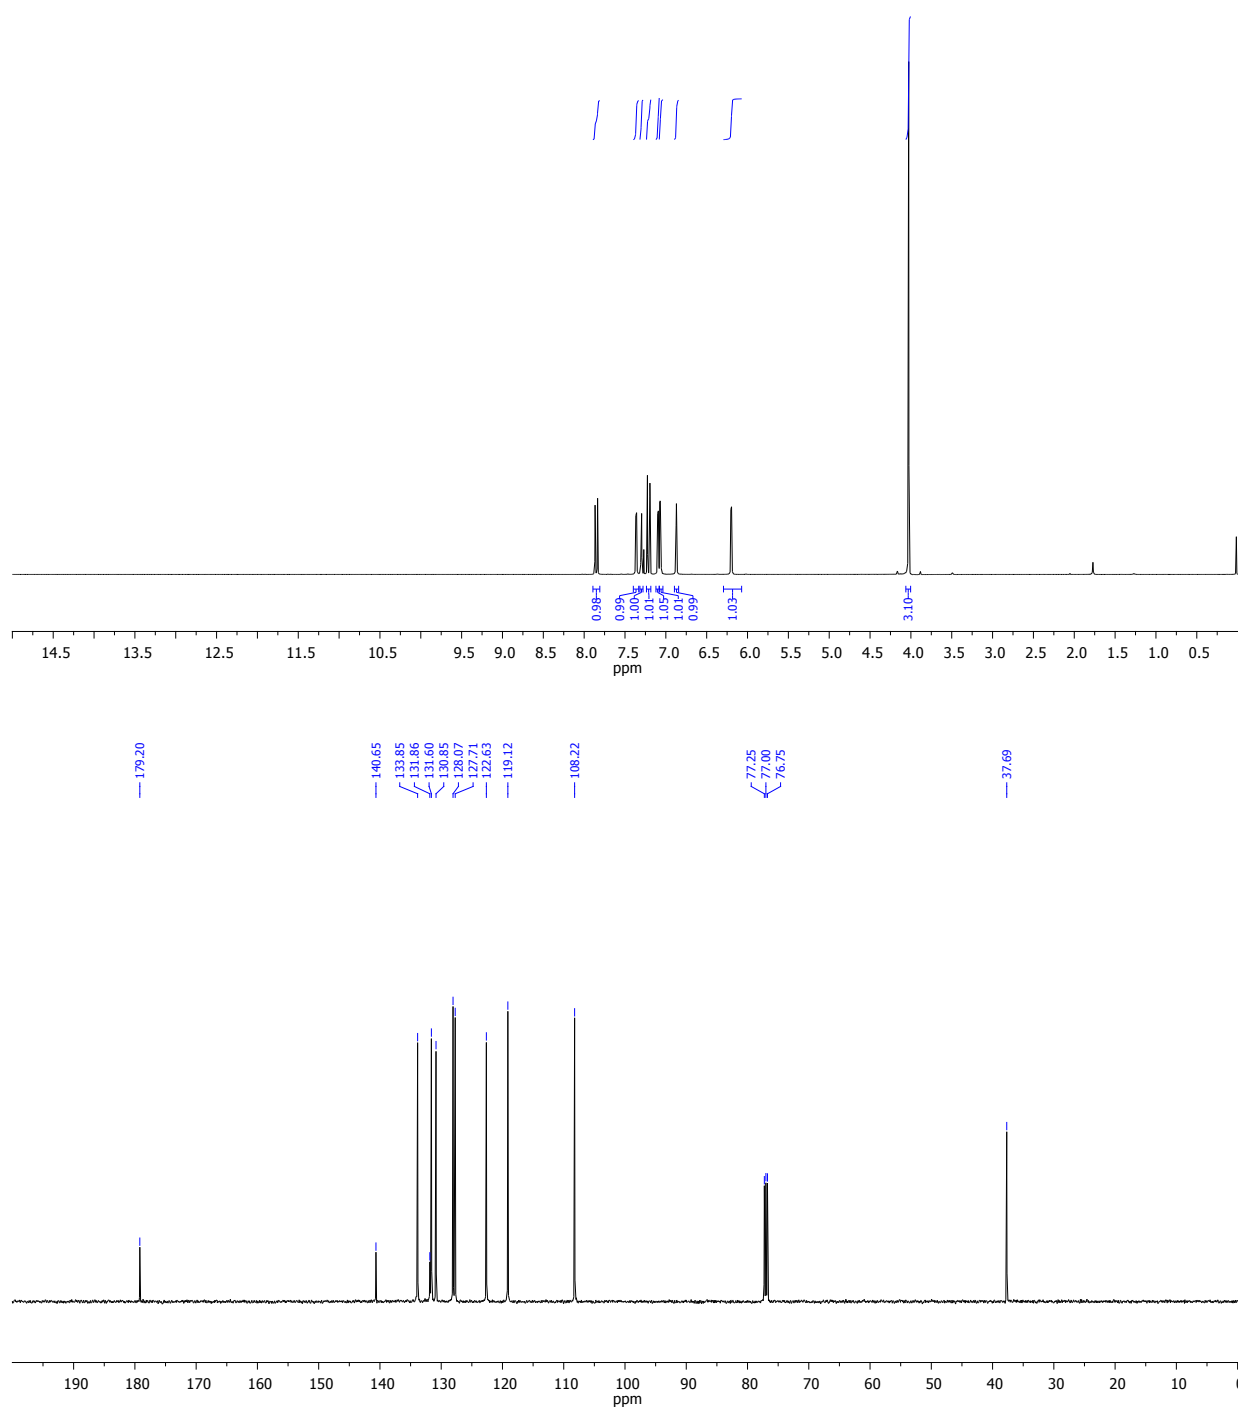

**Figure S32.** <sup>1</sup>H NMR and <sup>13</sup>C NMR spectra of compound **18e**

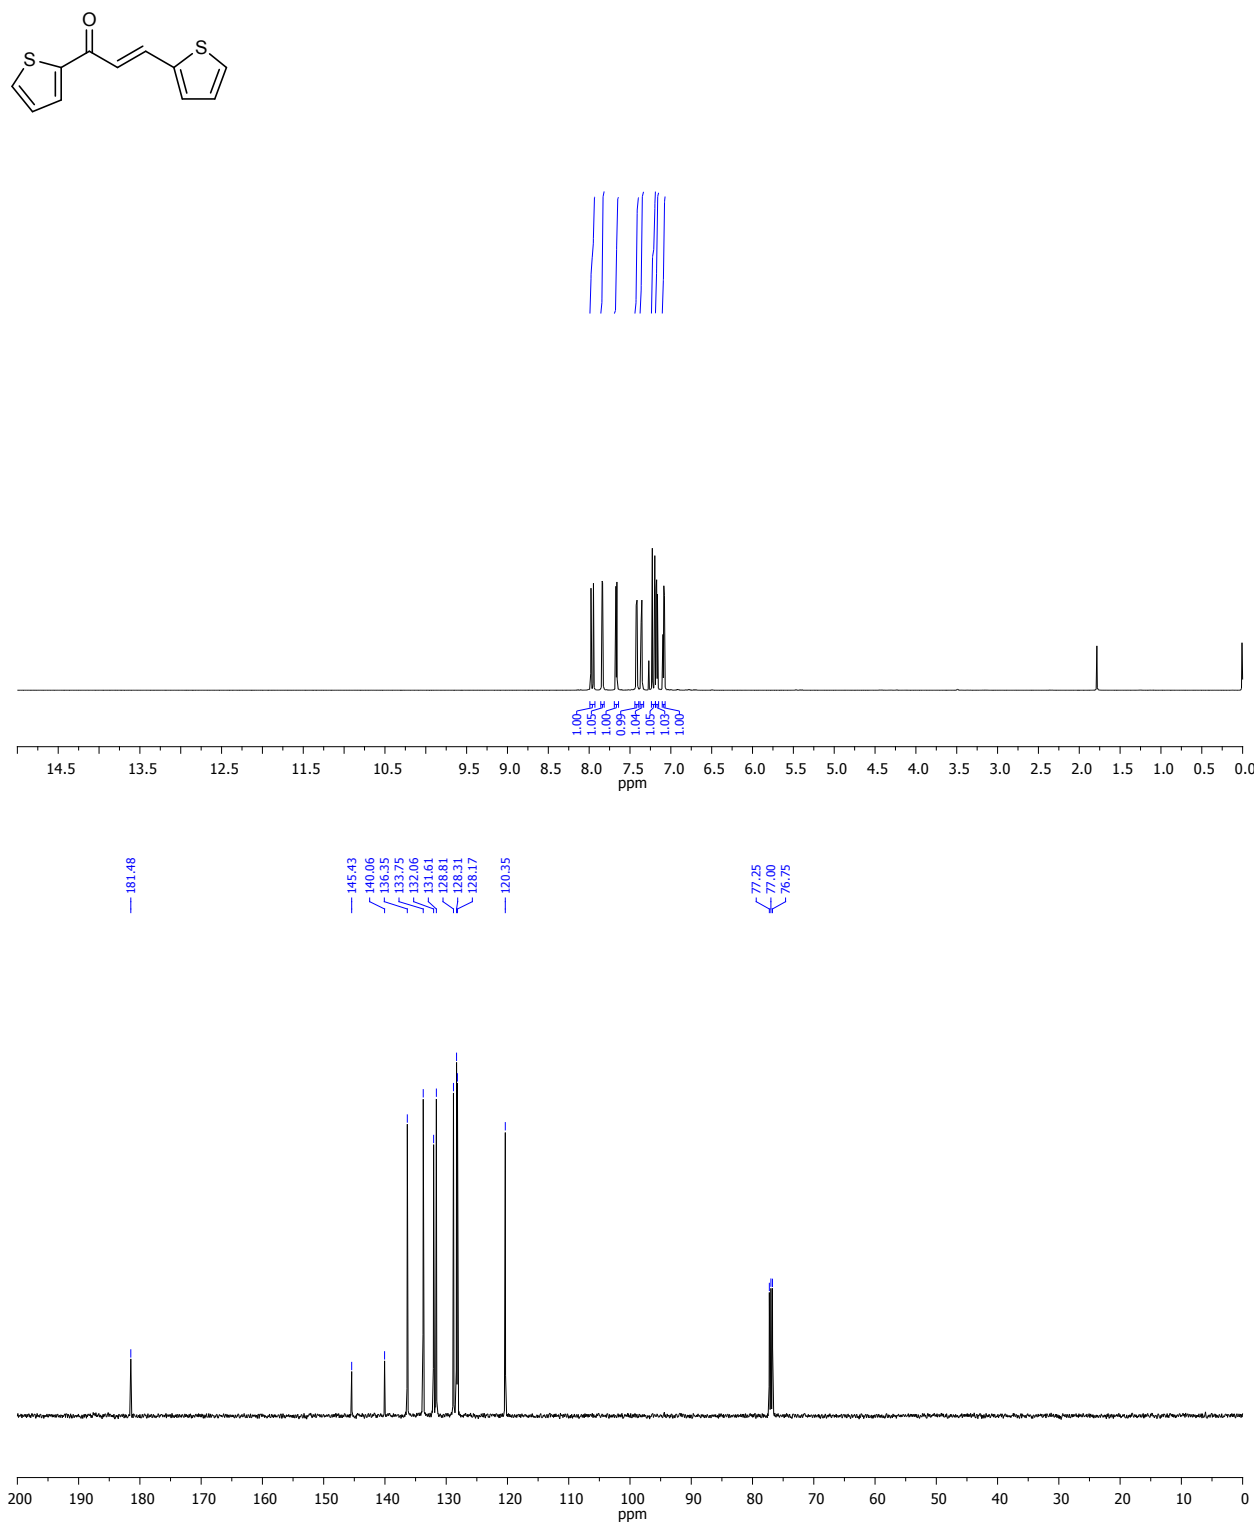

Figure S33. <sup>1</sup>H NMR and <sup>13</sup>C NMR spectra of compound **18f**

## References

1. Akhtar, M. N.; Sakeh, N. M.; Zareen, S.; Gul, S.; Lo, K. M.; Ul-Haq, Z.; Shah, S. A. A.; Ahmad, S. Design and synthesis of chalcone derivatives as potent tyrosinase inhibitors and their structural activity relationship. *J. Mol. Struct.* **2015**, *1085*, 97-103.
2. Boeck, P.; Bandeira Falcão, C. A.; Leal, P. C.; Yunes, R. A.; Filho, V. C.; Torres-Santos, E. C.; Rossi-Bergmann, B. Synthesis of chalcone analogues with increased antileishmanial activity. *Bioorg. Med. Chem.* **2006**, *14*, 1538-1545.
3. Boeck, P.; Leal, P. C.; Yunes, R. A.; Filho, V. C.; López, S.; Sortino, M.; Escalante, A.; Furlán, R. L. E.; Zacchino, S. Antifungal activity and studies on mode of action of novel xanthoxylone-derived chalcones. *Arch. Pharm.* **2005**, *338*, 87-95.
4. Dharmaratne, H. R.; Nanayakkara, N. P. D.; Khan, I. A. Kavalactones from *Piper methysticum*, and their <sup>13</sup>C NMR spectroscopic analyses. *Phytochemistry* **2002**, *59*, 429-433.
5. Rapado, L. N.; Freitas, G. C.; Polpo, A.; Rojas-Cardozo, M.; Rincón, J. V.; Scotti, M. T.; Kato, M. J.; Nakano, E.; Yamaguchi, L. F. A benzoic acid derivative and flavokawains from *Piper* species as schistosomiasis vector controls. *Molecules* **2014**, *19*, 5205-5218.
6. Srinivasan, B.; Johnson, T. E.; Lad, R.; Xing, C. Structure-activity relationship studies of chalcone leading to 3-hydroxy-4,3',4',5'-tetramethoxychalcone and its analogues as potent nuclear factor κB inhibitors and their anticancer activities. *J. Med. Chem.* **2009**, *52*, 7228-7235.
7. Mai, C. W.; Yaeghoobi, M.; Abd-Rahman, N.; Kang, Y. B.; Pichika, M. R. Chalcones with electron-withdrawing and electron-donating substituents: anticancer activity against TRAIL resistant cancer cells, structure-activity relationship analysis and regulation of apoptotic proteins. *Eur. J. Med. Chem.* **2014**, *77*, 378-387.
8. Morimoto, M.; Kumeda, S.; Komai, K. Insect antifeedant flavonoids from *Gnaphalium affine* D. Don. *J. Agri. Food Chem.* **2000**, *48*, 1888-1891.
9. Lu, K.; Yang, K.; Jia, X.; Gao, X.; Zhao, X.; Pan, G.; Ma, Y.; Huang, Q.; Yu, P. Total synthesis of I3, II8-biapigenin and ridiculoflavone A. *Org. Chem. Front.* **2017**, *4* (4), 578-586.
10. Rao, Y. K.; Fang, S.-H.; Tzeng, Y.-M. Differential effects of synthesized 2'-oxygenated chalcone derivatives: modulation of human cell cycle phase distribution. *Bioorg. Med. Chem.* **2004**, *12*, 2679-2686.
11. Akçok, İ.; Çağır, A. Synthesis of stilbene-fused 2'-hydroxychalcones and flavanones. *Bioorg. Chem.* **2010**, *38*, 139-143.
12. Barros, A. I. R. N. A.; Silva, A. M. S.; Alkorta, I.; Elguero, J. Synthesis, experimental and theoretical NMR study of 2'-hydroxychalcones bearing a nitro substituent on their B ring. *Tetrahedron* **2004**, *60*, 6513-6521.
13. Navarini, A. L. F.; Chiaradia, L. D.; Mascarello, A.; Fritzen, M.; Nunes, R. J.; Yunes, R. A.; Creczynski-Pasa, T. B. Hydroxychalcones induce apoptosis in B16-F10 melanoma cells via GSH and ATP depletion. *Eur. J. Med. Chem.* **2009**, *44*, 1630-1637.
14. Batt, D. G.; Goodman, R.; Jones, D. G.; Kerr, J. S.; Mantegna, L. R.; McAllister, C.; Newton, R. C.; Nurnberg, S.; Welch, P. K.; Covington, M. B. 2'-Substituted chalcone derivatives as inhibitors of interleukin-1 biosynthesis. *J. Med. Chem.* **1993**, *36*, 1434-1442.
